# Supplementary material
Source: bioRxiv or medRxiv preprint supplement (http://medrxiv.org/highwire/filestream/92837/field_highwire_adjunct_files/0/2020.08.05.20169169-1.pdf)
Supplement: Supplementary file [file 2020.08.05.20169169-1.pdf]

# Supplemental Materials

# Methods

[Supplemental Document 1. Detailed Study Design](#)

[Supplemental Document 2. Detailed Description of the Models](#)

[Supplemental Table 1. Countries' Health Expenditures](#)

[Supplemental Figure 1. Countries' Health Expenditures](#)

# Results

➤ [Acute Ischemic Stroke; Demographics](#)

[Supplemental Table 3. Subgroups of AIS Patients Younger or Older than 55-year-old](#)

[Supplemental Table 4. Subgroups of AIS Patients Younger or Older than 65-year-old](#)

[Supplemental Table 5. Subgroups of AIS Patients based on Sex](#)

➤ [Acute Ischemic Stroke; Outcome Measures](#)

[Supplemental Table 6. Subgroups of AIS Patients According to the TOAST Criteria](#)

[Supplemental Table 7. Subgroups of AIS Patients According to the NIHSS](#)

[Supplemental Table 8. Subgroups of AIS Patients According to the Presence or Absence of LVO](#)

[Supplemental Table 9. Subgroups of AIS Patients According to the Imaging Patterns](#)

[Supplemental Table 10. Subgroups of AIS Patients with Stroke as the Chief Complaints Versus others](#)

➤ [Acute Ischemic Stroke; Ecological Approach](#)

[Supplemental Table 11. Subgroups of AIS Patients based on Geographical Regions](#)

[Supplemental Table 12. Subgroups of AIS Patients According to the Countries' Health Expenditure](#)

- [Structure of the Models: Proportion of the Comorbidities under each Subclass of the Models](#)

[Supplemental Table 13. Dividing the SARS-CoV-2 Infected AIS Patients into 2 Subgroups](#)

[Supplemental Table 14. Dividing the SARS-CoV-2 Infected AIS Patients into 3 Subgroups](#)

[Supplemental Table 15A. Dividing the SARS-CoV-2 Infected AIS Patients into 4 and 5 Subgroups by Spectral Clustering](#)

[Supplemental Table 15B. Dividing the SARS-CoV-2 Infected AIS Patients into 4 and 5 Subgroups based on K-Mean Clustering](#)

[Supplemental Table 16. Dividing the SARS-CoV-2 Infected Patients with IPH into 2 Subgroups](#)

[Supplemental Table 17. Dividing the SARS-CoV-2 Infected Patients with IPH into 3 Subgroups](#)

[Supplemental Table 18A. Dividing the SARS-CoV-2 Infected Patients with IPH into 4 and 5 Subgroups by Spectral Clustering](#)

[Supplemental Table 18B. Dividing the SARS-CoV-2 Infected Patients with IPH into 4 and 5 Subgroups by K-Mean Clustering](#)

[Supplemental Figure 2. Contingency Matrices, models regarding the SARS-CoV-2 Infected Patients with AIS](#)

[Supplemental Figure 3. Contingency Matrices, models regarding the SARS-CoV-2 Infected Patients with IPH](#)

- [Acute Ischemic Stroke; Comparing the Patients among the Comorbidities' Subgroups](#)

[Supplemental Table 19. Subgroups of AIS Patients Clustered into 2 Groups](#)

[Supplemental Table 20. Subgroups of AIS Patients Clustered into 3 Groups](#)

- [Intraparenchymal Hemorrhage; Comparing the Patients among the Comorbidities' Subgroups](#)

[Supplemental Table 21. Dividing the IPH Patients to 2 Subgroups](#)

[Supplemental Table 22. Dividing the IPH Patients to 3 Subgroups](#)

## [Discussion](#)

[Discussion; Supplemental Table 23. TOAST subclasses and lacunar imaging findings in epidemiological studies](#)

## [References](#)

# SARS-CoV-2 and Stroke Characteristics:

## A Report from the multinational COVID-19 Stroke Study Group

Shima Shahjouei, MD, MPH,<sup>1</sup> Georgios Tsivgoulis, MD, PhD, MSc,<sup>2</sup> Ghasem Farahmand, MD,<sup>3,4</sup> Eric Koza, MD Candidate,<sup>5</sup> Ashkhan Mowla, MD,<sup>1,6</sup> Alireza Vafaei Sadr, PhD,<sup>7</sup> Arash Kia, MD,<sup>8</sup> Alaleh Vaghefi Far, MD,<sup>4</sup> Stefania Mondello, MD, PhD, MPH,<sup>9</sup> Achille Cernigliaro, PhD, MPH,<sup>10</sup> Annemarei Ranta, MD, PhD, FRACP,<sup>11</sup> Martin Punter, PhD, MBChB,<sup>11</sup> Faezeh Khodadadi, Pharm.D,<sup>12</sup> Mirna Sabra, PhD,<sup>13</sup> Mahtab Ramezani, MD,<sup>14</sup> Soheil Naderi, MD,<sup>15</sup> Oluwaseyi Olulana, MS,<sup>5</sup> Durgesh Chaudhary, MBBS,<sup>1</sup> Aicha Lyoubi, MD,<sup>16</sup> Bruce Campbell, MD,<sup>17,18</sup> Juan F. Arenillas, MD,<sup>19</sup> Daniel Bock, MD,<sup>20</sup> Joan Montaner, MD,<sup>21</sup> Saeideh Aghayari Sheikh Neshin, MD,<sup>22</sup> Diana Aguiar de Sousa, MD, PhD,<sup>23</sup> Matthew S. Tenser, MD,<sup>6</sup> Ana Aires, MD,<sup>24,25</sup> Mercedes De Lera Alfonso, MD,<sup>19</sup> Orkhan Alizada,<sup>26</sup> MD, Elsa Azevedo, MD,<sup>24,25</sup> Nitin Goyal, MD,<sup>27</sup> Zabihollah Babaepour, MD,<sup>28</sup> Gelareh Banihashemi, MD,<sup>29</sup> Leo H. Bonati, MD,<sup>30</sup> Carlo Cereda, MD,<sup>31</sup> Jason J. Chang, MD,<sup>32</sup> Miljenko Crnjakovic, MD,<sup>33</sup> GianMarco De Marchis, MD,<sup>34</sup> Massimo Del Sette, MD,<sup>35</sup> Seyed Amir Ebrahimzadeh, MD, MPH,<sup>36</sup> Mehdi Farhoudi, MD,<sup>37</sup> Ilaria Gandoglia, MD,<sup>35</sup> Bruno Gonçalves, MD,<sup>38</sup> Christoph Griessenauer, MD,<sup>1</sup> Mehmet Murat Hancı, MD,<sup>26</sup> Aristeidis H. Katsanos, MD,<sup>2,39</sup> Christos Krogias, MD,<sup>40</sup> Ronen Leker, MD,<sup>41</sup> Lev Lotman, MD,<sup>42</sup> Jeffrey Mai, MD,<sup>43</sup> Shailesh Male, MD,<sup>44</sup> Konark Malhotra, MD,<sup>45</sup> Branko Malojcic, MD, PhD,<sup>46</sup> Teresa Mesquita, MD,<sup>47</sup> Asadollah Mirghasemi, MD,<sup>48</sup> Hany Mohamed Aref, MD,<sup>49</sup> Zeinab Mohseni Afshar, MD,<sup>50</sup> Jusun Moon, MD,<sup>51</sup> Mika Niemelä, MD, PhD,<sup>52</sup> Behnam Rezaei Jahromi, MD,<sup>52</sup> Lawrence Nolan, MD,<sup>41</sup> Abhi Pandhi, MD,<sup>27</sup> Jong-Ho Park, MD,<sup>53</sup> João Pedro Marto, MD,<sup>46</sup> Francisco Purroy, MD, PhD,<sup>54</sup> Sakineh Ranji-Burachaloo, MD,<sup>3</sup> Nuno Reis Carreira, MD,<sup>55</sup> Manuel Requena, MD,<sup>56</sup> Marta Rubiera, MD,<sup>56</sup> Seyed Aidin Sajedi, MD,<sup>57</sup> João Sargento-Freitas, MD,<sup>58</sup> Vijay Sharma, MD,<sup>59</sup> Thorsten Steiner, MD,<sup>60,61</sup> Kristi Temprow, MD,<sup>41</sup> Guillaume Turc, MD, PhD, FESO, Yassaman Ahmadzadeh, MD,<sup>62</sup> Mostafa Almasi-Dooghaee, MD,<sup>63,64</sup> Farhad Assarzadegan, MD,<sup>14</sup> Arefeh Babazadeh, MD, MPH,<sup>65</sup> Humain Baharvahdat, MD,<sup>66</sup> Fabricio Cardoso, MD, MPH,<sup>67</sup> Apoorva Dev, PhD,<sup>12</sup> Mohammad Ghorbani, MD,<sup>68</sup> Ava Hamidi, MD,<sup>69</sup> Zeynab Sadat Hasheminejad, MD,<sup>70</sup> Sahar Hojjat-Anasri Komachali, MD,<sup>71</sup> Fariborz Khorvash, MD,<sup>72</sup> Firas Kobeissy, PhD,<sup>73</sup> Hamidreza Mirkarimi, MD,<sup>74</sup> Elahe Mohammadi-Vosough, MD,<sup>74</sup> Debdipto Misra, MS,<sup>75</sup> Ali Reza Noorian, MD,<sup>76</sup> Peyman Nowrouzi-Sohrabi, PhD,<sup>77</sup> Sepideh Paybast, MD,<sup>78</sup> Leila Poorsaadat, MD,<sup>79</sup> Mehrdad Roozbeh, MD,<sup>80</sup> Behnam Sabayan, MD, PhD,<sup>81</sup> Saeideh Salehizadeh,<sup>82</sup> Alia Saberi, MD,<sup>22</sup> Mercedeh Sepehrnia, MD,<sup>70</sup> Fahimeh Vahabizad, MD,<sup>29</sup> Thomas Yasuda, MD,<sup>67</sup> Ahmadreza Hojati Marvasti, MD,<sup>4</sup> Mojdeh Ghabaei, MD,<sup>3,4</sup> Nasrin Rahimian, MD, MPH,<sup>83</sup> Mohammad Hossein Harirchian, MD,<sup>3</sup> Afshin Borhani-Haghighi, MD,<sup>84</sup> Rohan Arora, MD,<sup>85</sup> Saeed Ansari, MD,<sup>27</sup> Venkatesh Avula, MS,<sup>86</sup> Jiang Li, MD,<sup>86</sup> Vida Abedi, MD,<sup>86,87</sup> Ramin Zand, MD, MPH.<sup>1</sup>

<sup>1</sup>Neurology Department, Neuroscience Institute, Geisinger Health System, Pennsylvania, USA;

<sup>2</sup>Second Department of Neurology, National and Kapodistrian University of Athens, School of Medicine, "Attikon" University Hospital, Athens, Greece;

<sup>3</sup>Iranian Center of Neurological Research, Neuroscience Institute, Tehran University of Medical Sciences, Tehran, Iran;

<sup>4</sup>Neurology Department, Tehran University of Medical Sciences, Tehran, Iran;

<sup>5</sup>Geisinger Commonwealth School of Medicine, Scranton, Pennsylvania, USA;

<sup>6</sup>Division of Stroke and Endovascular Neurosurgery, Department of Neurological Surgery, Keck School of Medicine, University of Southern California, California, USA;

<sup>7</sup>Department de Physique Theorique and Center for Astroparticle Physics, University Geneva, Switzerland;

<sup>8</sup>Icahn school of medicine at Mount Sinai, Department of Population Health Science and Policy, Institute for Healthcare Delivery Science, New York, USA;

<sup>9</sup>Department of Biomedical and Dental Sciences and Morphofunctional Imaging, University of Messina, Messina, Italy;

<sup>10</sup>Regional Health Authority of Sicily, Palermo, Italy;

<sup>11</sup>Department of Neurology, Wellington Hospital, Wellington, New Zealand;

<sup>12</sup>PES University, Bangalore, Karnataka, India;

<sup>13</sup>Neurosciences Research Center (NRC), Lebanese University/ Medical School, Beirut, Lebanon;

<sup>14</sup>Neurology Department, Shahid Beheshti University of Medical Sciences, Tehran, Iran;

<sup>15</sup>Department of Neurosurgery, Tehran University of Medical Sciences, Tehran, Iran;

<sup>16</sup>Neurology Department, Delafontaine Hospital, Saint-Denis, France

<sup>17</sup>Department of Neurology, Royal Melbourne Hospital, Parkville, Australia;

<sup>18</sup>University of Melbourne, Parkville, Australia;

<sup>19</sup>Department of Neurology, University of Valladolid, Valladolid, Spain;

<sup>20</sup>Department of Cardiology, Klinikum Frankfurt Höchst, Frankfurt Germany;

<sup>21</sup>Department of Neurology, Hospital Universitario Virgen Macarena, Sevilla, Spain;

<sup>22</sup>Neurology Department, Poursina Hospital, Rasht, Guilan, Iran;

<sup>23</sup>Department of Neurology, Hospital de Santa Maria, University of Lisbon, Lisbon, Portugal;

<sup>24</sup>Department of Neurology, Centro Hospitalar Universitário de São João, Porto, Portugal;

<sup>25</sup>Faculty of Medicine, University of Porto, Porto, Portugal;

<sup>26</sup>Neurosurgery Department, Istanbul University-Cerrahpasa, Cerrahpasa Medical Faculty, Istanbul, Turkey;

<sup>27</sup>Department of Neurology, University of Tennessee, Tennessee, USA;

<sup>28</sup>Neurology Ward, Valiasr Hospital, Borujen, Iran;

<sup>29</sup>Neurology Department, Sina Hospital, Tehran University of Medical Sciences, Tehran, Iran;

- <sup>30</sup>Department of Neurology and Stroke Unit, University Hospital Basel, Switzerland;
- <sup>31</sup>Stroke Center, Neurocenter of Southern Switzerland, Lugano, Switzerland;
- <sup>32</sup>Department of Critical Care Medicine, MedStar Washington Hospital Center, Washington, DC, USA;
- <sup>33</sup>Intensive Care Unit, Department of Neurology, Clinical Hospital Dubrava, Zagreb, Croatia;
- <sup>34</sup>Neurorehabilitation Unit, University Center for Medicine of Aging and Rehabilitation Basel, Felix Platter Hospital, University of Basel, Switzerland;
- <sup>35</sup>Neurology Unit, Galliera Hospital, Genova, Italy;
- <sup>36</sup>Department of Radiology, Yasrebi Hospital, Kashan, Iran;
- <sup>37</sup>Neurosciences Research Center (NSRC), Tabriz University of Medical Sciences, Tabriz, Iran;
- <sup>38</sup>Department of Neurology, GHU Paris Psychiatrie et Neurosciences, Université de Paris, INSERM U1266, Paris, France;
- <sup>39</sup>Division of Neurology, McMaster University/ Population Health Research Institute, Hamilton, ON, Canada
- <sup>40</sup>Department of Neurology, St. Josef-Hospital, Ruhr University Bochum, Bochum, Germany;
- <sup>41</sup>Department of Neurology, Hadassah-Hebrew University Medical Center, Jerusalem, Israel;
- <sup>42</sup>Department of Neurology, Albany Medical Center, Albany, NY;
- <sup>43</sup>Department of Neurosurgery, Georgetown University and MedStar Washington Hospital Center, Washington, DC, USA;
- <sup>44</sup>Neurology Department, Vidant Medical Center, Greenville, North Carolina, USA;
- <sup>45</sup>Department of Neurology, Allegheny Health Network (AHN), Pittsburgh, Pennsylvania, USA;
- <sup>46</sup>TIA Clinic, Department of Neurology, University Hospital Centre Zagreb, Zagreb School of Medicine, University of Zagreb, Zagreb, Croatia;
- <sup>47</sup>Department of Neurology, Hospital de Egas Moniz, Centro Hospitalar Lisboa Ocidental, Lisbon, Portugal;
- <sup>48</sup>Department of Anesthesiology, University of Ottawa, Canada;
- <sup>49</sup>Department of Neurology, Ain Shams University, Cairo, Egypt;
- <sup>50</sup>Infection Disease Research Center, Kermanshah University of Medical Sciences, Kermanshah, Iran;
- <sup>51</sup>Department of Neurology, National Medical Center, Seoul, South Korea;
- <sup>52</sup>Department of Neurosurgery, Helsinki University Hospital, Helsinki, Finland;
- <sup>53</sup>Department of Neurology, Myongji Hospital, Hanyang University College of Medicine, South Korea;
- <sup>54</sup>Department of Neurology, Hospital Arnau de Vilanova, Lleida, Spain;
- <sup>55</sup>Department of Neurology, Hospital Arnau de Vilanova, Institut de Recerca Biomèdica de Lleida (IRBLleida), Universitat de Lleida UdL Lleida, Spain
- <sup>56</sup>Stroke Unit, Department of Neurology, Hospital Vall d'Hebron. Department de Medicina, Universitat Autònoma de Barcelona, Barcelona, Spain;
- <sup>57</sup>Neuroscience Research Center, Department of Neurology, Golestan University of Medical Sciences, Golestan, Iran;
- <sup>58</sup>Department of Neurology, Centro Hospitalar e Universitário de Coimbra, Coimbra, Portugal;
- <sup>59</sup>Division of Neurology, University Medicine Cluster, National University Health System, Singapore, Singapore;
- <sup>60</sup>Department of Neurology, Klinikum Frankfurt Höchst, Frankfurt, Germany;
- <sup>61</sup>Department of Neurology Heidelberg University Hospital, Germany
- <sup>62</sup>Hospital for Special Surgery, New York, USA;
- <sup>63</sup>Divisions of Vascular and Endovascular Neurosurgery and Neurology, Firoozgar Hospital, Iran University of Medical Sciences, Tehran, Iran;
- <sup>64</sup>Divisions of Vascular and Endovascular Neurosurgery and Neurology, Rasoul-Akram Hospital, Iran University of Medical Sciences, Tehran, Iran;
- <sup>65</sup>Infectious Diseases and Tropical Medicine Research Center, Health Research Institute, Babol University of Medical Sciences, Babol, Iran;
- <sup>66</sup>Neurosurgical Department, Ghaem Hospital, Mashhad University of Medical Sciences, Mashhad, Iran;
- <sup>67</sup>Neurology Department, Centro Médico de Campinas, São Paulo, Brazil;
- <sup>68</sup>Division of Vascular and Endovascular Neurosurgery, Firoozgar Hospital, Iran University of Medical Sciences, Tehran, Iran;
- <sup>69</sup>Neurology Ward, Gheshm Hospital, Gheshm, Iran;
- <sup>70</sup>Department of Neurology, Imam Hosein Hospital, Shahid Beheshti Medical University, Tehran, Iran;
- <sup>71</sup>Department of Neurology, Pirooz hospital, Gilan University of Medical Sciences, Lahijan, Iran;
- <sup>72</sup>Professor Of Neurology, Isfahan University of Neurology, Isfahan, Iran;
- <sup>73</sup>Program of Neurotrauma, Neuroproteomics and Biomarker Research (NNBR), University of Florida, Florida, USA;
- <sup>74</sup>Neurology Ward, Modarres Hospital, Kashmar, Iran;
- <sup>75</sup>Steele Institute of Health & Innovation, Geisinger Health System, Pennsylvania, USA;
- <sup>76</sup>Department of Neurology, Southern California Permanente Medical Group, Irvine, California, USA;
- <sup>77</sup>Student Research Committee, Shiraz University of Medical Sciences, Shiraz, Iran;
- <sup>78</sup>Department of Neurology, Bou Ali hospital, Qazvin University of Medical Sciences, Qazvin, Iran;
- <sup>79</sup>Department of Neurology, Arak University of Medical Sciences, Arak, Iran;
- <sup>80</sup>Brain Mapping Research Center, Shahid Beheshti University of Medical Sciences, Tehran, Iran;
- <sup>81</sup>Department of Neurology, Massachusetts General Hospital, Harvard Medical School, Boston, MA, USA;
- <sup>82</sup>Salahadin Ayubi Hospital, Baneh, Iran;
- <sup>83</sup>Department of Neurology, Yasrebi Hospital, Kashan, Iran;
- <sup>84</sup>Clinical Neurology Research Center, Shiraz University of Medical Sciences, Shiraz, Iran;
- <sup>85</sup>Department of Neurology, Long Island Jewish Forest Hills, Queens, New York, USA;
- <sup>86</sup>Department of Molecular and Functional Genomics, Geisinger Health System, Danville, Pennsylvania, USA;
- <sup>87</sup>Biocomplexity Institute, Virginia Tech, Blacksburg, Virginia, USA.

Corresponding Author:

Ramin Zand M.D., M.P.H.  
 Neuroscience Institute, Geisinger,  
 100 North Academy Ave. Danville, PA, 17822  
 phone number: 570-214-4101  
 Fax number: (570) 808-3208  
 E-mail address: [rzand@geisinger.edu](mailto:rzand@geisinger.edu); [ramin.zand@gmail.com](mailto:ramin.zand@gmail.com)  
 Laboratory: [www.thedecodelab.com](http://www.thedecodelab.com)

# METHODS

# Methods; Supplemental Document 1.

## Detailed Study Design

This multicenter, multinational observational study was conducted and reported according to the Strengthening the Reporting of Observational Studies in Epidemiology (STROBE),<sup>1</sup> and Enhancing the QUALity and Transparency Of health Research (EQUATOR) guidelines.<sup>2</sup> The study protocol was designed by the investigators at the Neuroscience Institute of Geisinger Health System, Pennsylvania, USA, and received approval by the Institutional Review Board of Geisinger Health System and other participating institutions when it was required. Investigators from North America (Canada and six states of the United States), South America (Brazil and Mexico), Europe (Belgium, Croatia, Czech Republic, Finland, France, Germany, Greece, Ireland, Italy, Norway, Portugal, Spain, Sweden, and Switzerland), Asia and the Middle East (India, Iran, Iraq, Israel, Lebanon, Singapore, South Korea, Turkey, and the United Arab Emirate), Oceania (Australia and New Zealand), and Africa (Egypt, Nigeria, and Uganda) responded to our invitation. The centers were included by non-probability sampling and data were recruited until June 10th, 2020. The core investigators invited their existing networks and collaborators from several countries through phone calls, emails, and announcements on social media platforms for professionals. The investigators and collaborators further introduced the study to local societies for physicians, academic health systems, hospitals that were designated as COVID-19 centers, services in charge of stroke patients, and other related organizations, sometimes using local languages. The authors also invited many stroke clinic investigators in other affected countries. In the USA, our collaborators from seven health systems accepted our invitation. Tertiary centers from health systems in New York, Pennsylvania, Tennessee, North Carolina, Virginia, and California provided data. In New Zealand, the data collection was led by the National Stroke Register team, which is supported by the National Stroke Network and the New Zealand Ministry of Health. Stroke physicians from all districts (Auckland, Bay of Plenty, Canterbury, Capital and Coast, Counties Manukau, Hawke's Bay, Lakes, Mid Central, Nelson Marlborough, Northland District, South Canterbury, Southern, Tairāwhiti, Taranaki, Waikato, Waitemata, West Coast, Wairarapa, Whanganui, and Hutt Valley) further verified the stroke events. In Iran, we communicated with the Departments of Neurology and Neurosurgery in main university hospitals according to the ranking by the Iranian Ministry of Health and Medical Education, geographical location, and whether the center was located in the SARS-CoV-2 infection hot spots. The local investigators further announced the invitation through the Iranian Stroke Organization and the National Society for Neurologists portals. We received data from 16 provinces (Tehran, East Azerbaijan, Khorasan, Guilan, Ardabil, Isfahan, Golestan, Kermanshah, Semnan, Hormozgan,

Kerman, Lorestan, Khuzestan, Markazi, Fars, and Ghazvin). In India, detailed data regarding the stroke were obtained from four states (Karnataka, Chhattisgarh, Ladakh, and Uttar Khand). Data from all Karnataka districts (Bengaluru, Mysuru, Belagavi, Kalaburgi, Vijayapura, Chikkaballapur, Bagalkote, Bidar, and Dakshina-Kannada) were obtained from the Government of Karnataka, Department of Health and Family Welfare in Bengaluru. Records of stroke were rechecked with Stroke Registry in Karnataka and individual communications with 15 tertiary centers in Bengaluru. In Lebanon, two health systems in Beirut, where over 75% of patients with SARS-CoV-2 diagnosis were hospitalized, participated in this study. In Italy, data from Sicily were provided by the Regional Health Authority of Sicily. We also received data from Genova. Multiple centers in Switzerland (Lugano, and Basel), Israel (Jerusalem), Portugal (Porto, Coimbra, and Lisbon), Spain (Valladolid, Barcelona, Lleida, and Seville), Greece (Athens), Germany (Frankfurt, and Bochum), France (Paris), Croatia (Zagreb), Brazil (São Paulo), Turkey (Istanbul), Finland (Helsinki), South Korea (Seoul), Australia (Adelaide, Melbourne, and Sydney), Uganda (Kampala), Egypt (Cairo) collaborated in this study. Collaborators from United Arab Emirates (Abu Dhabi) could not provide data by the deadline. Several centers reported no eligible patients for this study. Centers in Brazil, Canada, Croatia, Egypt, France, Germany, Greece, Iran, Israel, Italy, Portugal, Republic of Korea, Singapore, Spain, Switzerland, Turkey, and the United States reported data on their patients for the purpose of this study.



# Methods; Supplemental Document 2.

## Detailed Description of the Models

The patients were clustered based on the laboratory findings and comorbidities. We used clinicians' expert opinion (EX models), or unsupervised machine learning algorithms (ML models) for defining the clusters. The results of different models were compared through the contingency matrix (a.k.a contingency table).<sup>3</sup> We could not introduce any clustering based on the laboratory findings. The models for clustering the patients based on the comorbidities are as follows:

### A. Models based on the expert opinion (EX models)

Patients were categorized based on the number of the existing comorbidities. We either considered all comorbidities (Expert-All, EX-A models; including hypertension, diabetes mellitus, ischemic heart disease, atrial fibrillation, carotid stenosis, chronic kidney disease, cardiac ejection fraction less than 40%, active neoplasm, rheumatological diseases, history of transient ischemic attack or stroke, and current smoking), or selected number of vascular comorbidities (Expert-Selected, EX-S models; including hypertension, diabetes mellitus, ischemic heart disease, atrial fibrillation, carotid stenosis, chronic kidney disease, previous transient ischemic attack or stroke, and current smoking). We further clustered the patients under each of these models to two (EX-A<sub>2</sub> and EX-S<sub>2</sub>) or three (EX-A<sub>3</sub> and EX-S<sub>3</sub>) subgroups.

1. EX-A<sub>2</sub>: based on expert opinion and including all comorbidities, in two subgroups.
  - a. Subgroup a: zero or one comorbidity,
  - b. Subgroup b: more than one comorbidity.
2. EX-S<sub>2</sub>: based on expert opinion and including selected comorbidities, in two subgroups.
  - a. Subgroup a: zero or one comorbidity,
  - b. Subgroup b: more than one comorbidity.
3. EX-A<sub>3</sub>: based on expert opinion and including all comorbidities, in three subgroups.
  - a. Subgroup a: zero comorbidity,
  - b. Subgroup b: one or two comorbidities,
  - c. Subgroup c: more than two comorbidities.
4. EX-S<sub>3</sub>: based on expert opinion and including selected comorbidities, in three subgroups.
  - a. Subgroup a: zero comorbidity,
  - b. Subgroup b: one or two comorbidities,
  - c. Subgroup c: more than two comorbidities.

### B. Models based on machine learning algorithms (ML models)

We used unsupervised machine learning algorithms for clustering. Hierarchical and K-means clustering (ML-K models) and spectral clustering (ML-S models) were used. We grouped the patients to two (ML-K<sub>2</sub> and ML-S<sub>2</sub>), three (ML-K<sub>3</sub> and ML-S<sub>3</sub>), four (ML-K<sub>4</sub> and ML-S<sub>4</sub>), and five (ML-K<sub>5</sub> and ML-S<sub>5</sub>) clusters.

**Methods**

**Supplemental Table 1 &**

**Supplemental Figure 1**

**Country Health Expenditures**

**Supplemental Table 1.** Annual country health expenditures during 2010 – 2017, according to WHO Health Expenditure reports. These countries provided reports of stroke among SARS-CoV-2 infected patients.

| Countries                | Current Health Expenditure (CHE) per Capita in US\$ |            |            |            |             |            |            |             |
|--------------------------|-----------------------------------------------------|------------|------------|------------|-------------|------------|------------|-------------|
|                          | 2010                                                | 2011       | 2012       | 2013       | 2014        | 2015       | 2016       | 2017        |
| United States of America | \$7,957.28                                          | \$8,169.91 | \$8,441.00 | \$8,647.64 | \$9,068.00  | \$9,538.07 | \$9,941.35 | \$10,246.14 |
| Switzerland              | \$8,021.81                                          | \$9,572.17 | \$9,286.55 | \$9,689.67 | \$10,014.71 | \$9,807.80 | \$9,835.96 | \$9,956.26  |
| Germany                  | \$4,597.24                                          | \$5,021.63 | \$4,754.66 | \$5,094.42 | \$5,290.72  | \$4,617.49 | \$4,734.18 | \$5,033.45  |
| Canada                   | \$5,044.14                                          | \$5,361.24 | \$5,408.93 | \$5,345.32 | \$5,081.56  | \$4,539.14 | \$4,518.14 | \$4,754.95  |
| France                   | \$4,593.39                                          | \$4,933.40 | \$4,652.29 | \$4,900.39 | \$4,987.87  | \$4,204.09 | \$4,256.96 | \$4,379.73  |
| Israel                   | \$2,211.02                                          | \$2,410.75 | \$2,376.65 | \$2,648.82 | \$2,788.50  | \$2,640.31 | \$2,856.18 | \$3,144.63  |
| Italy                    | \$3,214.55                                          | \$3,387.58 | \$3,125.61 | \$3,195.55 | \$3,190.09  | \$2,708.84 | \$2,736.26 | \$2,840.13  |
| Singapore                | \$1,513.57                                          | \$1,704.37 | \$1,863.08 | \$2,114.62 | \$2,237.40  | \$2,326.27 | \$2,489.91 | \$2,618.71  |
| Spain                    | \$2,775.14                                          | \$2,894.76 | \$2,588.67 | \$2,628.86 | \$2,671.28  | \$2,351.53 | \$2,390.63 | \$2,506.46  |
| Republic of Korea        | \$1,374.27                                          | \$1,521.49 | \$1,575.86 | \$1,712.08 | \$1,910.74  | \$1,925.47 | \$2,040.41 | \$2,283.07  |
| Portugal                 | \$2,213.10                                          | \$2,207.70 | \$1,918.60 | \$1,959.42 | \$1,986.89  | \$1,724.53 | \$1,802.77 | \$1,908.03  |
| Greece                   | \$2,573.74                                          | \$2,354.01 | \$1,968.48 | \$1,834.34 | \$1,724.53  | \$1,464.73 | \$1,499.35 | \$1,516.59  |
| Brazil                   | \$891.76                                            | \$1,025.49 | \$950.93   | \$974.50   | \$1,009.83  | \$776.15   | \$795.66   | \$928.80    |
| Croatia                  | \$1,126.37                                          | \$1,132.50 | \$1,029.97 | \$889.94   | \$909.37    | \$795.52   | \$840.91   | \$902.14    |
| Iran                     | \$440.85                                            | \$524.69   | \$519.30   | \$413.73   | \$382.71    | \$375.13   | \$454.19   | \$475.48    |
| Turkey                   | \$539.33                                            | \$531.66   | \$524.82   | \$552.41   | \$527.20    | \$454.61   | \$468.65   | \$444.65    |
| Egypt                    | \$111.44                                            | \$123.26   | \$143.38   | \$140.33   | \$153.79    | \$180.82   | \$151.47   | \$105.77    |

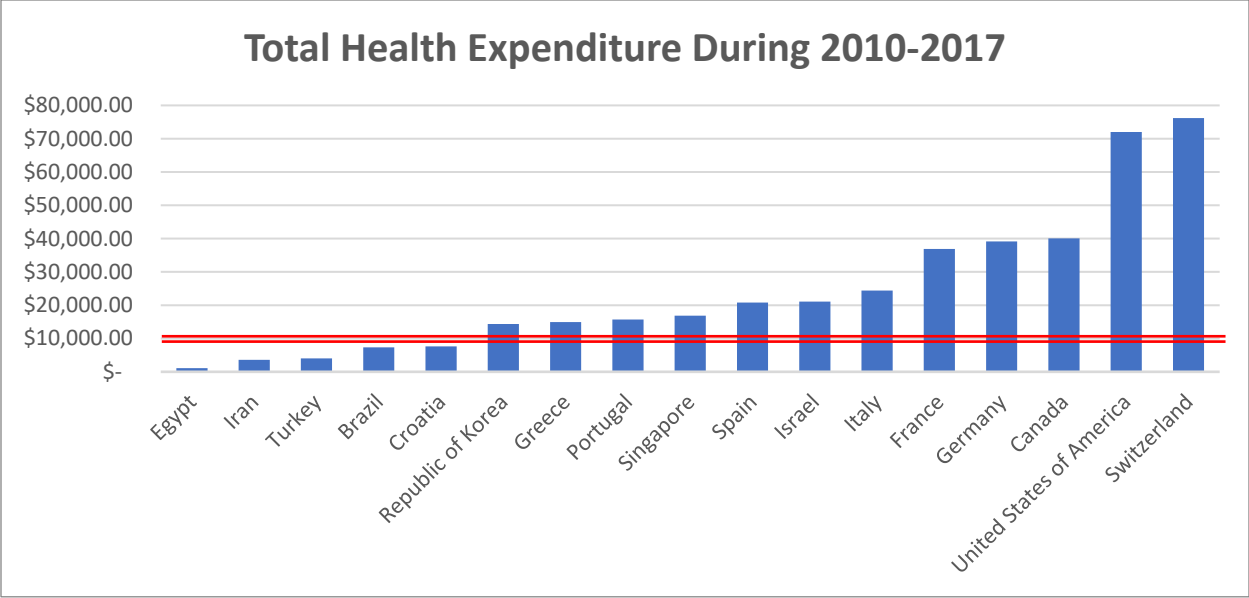

**Supplemental Figure 1.** Distribution of total health expenditures during 2010-2017 by country, according to WHO Health Expenditure. These countries provided reports of stroke among SARS-CoV-2 infected patients.

# RESULTS

# **Results**

## **Acute Ischemic Stroke;**

### **Demographics**

#### **Supplemental Tables 3-5**

### Results; Supplemental Table 3. Subgroups of AIS patients younger or older than 55-year-old

Baseline characteristics, comorbidities, and laboratory findings among SARS-CoV-2 patients with an acute ischemic stroke, comparing those younger versus older than 55. **Blue ink indicates the post-hoc p values.**

| Parameter                                                              | Age <55-year-old<br>N = 67 (36.2%) | Age >55-year-old<br>N = 256 (79.3%) | P-value |
|------------------------------------------------------------------------|------------------------------------|-------------------------------------|---------|
| Sex; Female; N (%)                                                     | 29 (41.8)                          | 102 (39.8)                          | 0.77    |
| Large Vessel Occlusion; N (%)                                          | 30 (47.6)                          | 96 (43.6)                           | 0.58    |
| Intravenous Thrombolysis; N (%)                                        | 11 (16.4)                          | 33 (12.9)                           | 0.45    |
| Mechanical Thrombectomy; N (%)                                         | 8 (11.9)                           | 16 (6.3)                            | 0.11    |
| National Institutes of Health Stroke Scale (NIHSS) Score; Median [IQR] | 8.0 [4.0 – 17.0]                   | 9.0 [4.0 – 17.0]                    | 0.68    |
| Imaging Patterns                                                       |                                    |                                     |         |
| Embollic/Large Vessel athero-Thromboembolism; N (%)                    | 46 (78.0)                          | 160 (81.2)                          | 0.21    |
| Lacune; N (%)                                                          | 4 (6.8)                            | 22 (11.2)                           |         |
| Border-zone; N (%)                                                     | 9 (15.3)                           | 14 (7.1)                            |         |
| Vasculitis Pattern; N (%)                                              | 0 (0.0)                            | 1 (0.5)                             |         |
| TOAST                                                                  |                                    |                                     |         |
| Large-Artery Atherosclerosis; N (%)                                    | 14 (31.1)                          | 42 (33.6)                           | 0.05    |
| Cardio-embolism; N (%)                                                 | 7 (15.6)                           | 39 (31.2) <sup>A (0.04)</sup>       |         |
| Small-Vessel Occlusion; N (%)                                          | 4 (8.9)                            | 13 (10.4)                           |         |
| Stroke of Other Determined Etiology; N (%)                             | 7 (15.6) <sup>B (0.02)</sup>       | 6 (4.8)                             |         |
| Stroke of Undetermined Etiology; N (%)                                 | 13 (28.9)                          | 25 (20.0)                           |         |
| Interval Between Onset to Index Event; Median [IQR]; Days              | 4.0 [0.0 – 10.0]                   | 3.0 [0.0 – 8.0]                     | 0.22    |
| Mechanical Ventilation; N (%)                                          | 18 (26.9)                          | 67 (26.2)                           | 0.91    |
| Disposition*                                                           |                                    |                                     |         |
| Discharged Home; N (%)                                                 | 39 (59.4) <sup>B (0.002)</sup>     | 89 (38.9)                           | <0.001  |
| In Hospital Mortality; N (%)                                           | 8 (12.5)                           | 74 (31.8) <sup>A (0.01)</sup>       |         |
| Still in Hospital/Subacute Care; N (%)                                 | 18 (28.1)                          | 70 (30.0)                           |         |
| Length of Hospital Stay; Median (IQR); Days                            | 12.0 [5.0 – 18.0]                  | 7.0 [4.0 – 15.0]                    | 0.05    |
| Comorbidities                                                          |                                    |                                     |         |
| Hypertension; N (%)                                                    | 26 (39.4)                          | 176 (69.3)                          | <0.001  |
| Diabetes Mellitus; N (%)                                               | 20 (29.9)                          | 91 (35.8)                           | 0.36    |
| Ischemic Heart Disease; N (%)                                          | 9 (13.8)                           | 63 (27.3)                           | 0.03    |
| Atrial Fibrillation; N (%)                                             | 4 (6.1)                            | 41 (16.1)                           | 0.04    |
| Carotid Stenosis; N (%)                                                | 3 (4.6)                            | 35 (15.2)                           | 0.03    |

| Parameter                                                | Age <55-year-old<br>N = 67 (36.2%) | Age >55-year-old<br>N = 256 (79.3%) | P-value |
|----------------------------------------------------------|------------------------------------|-------------------------------------|---------|
| Chronic Kidney Disease; N (%)                            | 12 (18.2)                          | 30 (11.8)                           | 0.17    |
| Cardiac Ejection Fraction <40%; N (%)                    | 4 (6.2)                            | 20 (8.7)                            | 0.51    |
| Active Neoplasm; N (%)                                   | 4 (6.2)                            | 17 (7.4)                            | 0.74    |
| Rheumatological Disease; N (%)                           | 1 (1.5)                            | 4 (1.7)                             | 0.92    |
| Prior Stroke or Transient Ischemic Attack; N (%)         | 1 (1.5)                            | 4 (1.7)                             | 0.92    |
| Smoking; N (%)                                           | 8 (12.1)                           | 45 (17.7)                           | 0.28    |
| <b>Laboratory Findings</b>                               |                                    |                                     |         |
| White Blood Cell Count x10 <sup>9</sup> /L; Mean (SD)    | 9.9 ± 4.8                          | 9.8 ± 4.8                           | 0.91    |
| White Blood Cell Count x10 <sup>9</sup> /L; Median [IQR] | 9.1 [7.3 – 11.6]                   | 9.0 [6.7 – 11.1]                    | 0.96    |
| Neutrophil Count x10 <sup>9</sup> /L; Mean (SD)          | 7.7 ± 4.7                          | 7.7 ± 4.4                           | 0.99    |
| Neutrophil Count x10 <sup>9</sup> /L; Median [IQR]       | 6.7 [4.8 – 9.1]                    | 6.8 [4.8 – 9.3]                     | 0.86    |
| Lymphocyte Count x10 <sup>9</sup> /L; Mean (SD)          | 2.0 ± 2.3                          | 1.6 ± 1.4                           | 0.05    |
| Lymphocyte x10 <sup>9</sup> /L; Median [IQR]             | 1.6 [1.2 – 2.2]                    | 1.3 [0.9 – 1.9]                     | <0.001  |
| Platelet Count x10 <sup>9</sup> /L; Mean (SD)            | 315.9 ± 201.9                      | 314.2 ± 487.5                       | 0.98    |
| Platelet Count x10 <sup>9</sup> /L; Median [IQR]         | 259.5 [179.0 – 398.5]              | 219.0 [158.5 – 315.0]               | 0.02    |
| Alanine Transaminase (ALT); Mean (SD); U/L               | 43.4 ± 60.4                        | 69.3 ± 92.0                         | 0.01    |
| Alanine Transaminase (ALT); Median [IQR] ; U/L           | 17.1 [6.1 – 56.4]                  | 34.3 [12.0 – 99.0]                  | 0.02    |
| Aspartate Transaminase (AST); Mean (SD); U/L             | 20.9 ± 16.2                        | 35.2 ± 28.2                         | <0.001  |
| Aspartate Transaminase (AST); Median [IQR] ; U/L         | 16.0 [10.4 – 25.0]                 | 26.0 [15.0 – 44.0]                  | <0.001  |
| Blood Urea Nitrogen (BUN); Mean (SD); mg/dl              | 68.0 ± 197.7                       | 48.8 ± 53.6                         | 0.46    |
| Blood Urea Nitrogen (BUN); Median [IQR]; mg/dl           | 30.0 [18.0 – 50.0]                 | 33.0 [22.0 – 50.0]                  | 0.38    |
| Creatinine; Mean (SD); mg/dl                             | 1.4 ± 1.5                          | 1.5 ± 1.8                           | 0.53    |
| Creatinine; Median [IQR]; mg/dl                          | 0.9 [0.8 – 1.2]                    | 1.1 [0.9 – 1.5]                     | <0.001  |
| C-Reactive Protein (CRP); Mean (SD); mg/L                | 87.0 ± 259.0                       | 54.0 ± 55.0                         | 0.34    |
| C-Reactive Protein (CRP); Median [IQR]; mg/L             | 32.0 [20.0 – 48.0]                 | 38.0 [25.0 – 60.0]                  | 0.06    |
| Lactate Dehydrogenase (LDH); Mean (SD); U/L              | 487.1 ± 334.5                      | 635.3 ± 1716.0                      | 0.64    |
| Lactate Dehydrogenase (LDH); Median [IQR]; U/L           | 397.5 [286.0 – 588.0]              | 371.0 [241.5 – 522.5]               | 0.44    |
| Fibrinogen; Mean (SD); mg/dl                             | 285.6 ± 266.5                      | 547.8 ± 1181.4                      | 0.27    |
| Fibrinogen; Median [IQR]; mg/dl                          | 338.5 [4.0 – 501.0]                | 220.0 [42.0 – 490.0]                | 0.70    |
| D- Dimer; Mean (SD); ng/ml                               | 1911.7 ± 3209.7                    | 2884.7 ± 7135.6                     | 0.47    |
| D- Dimer; Median [IQR]; ng/ml                            | 625.5 [426.0 – 2085.0]             | 1100.0 [585.0 – 2205.0]             | 0.22    |

\* Data on patients' disposition were sparse.



## Results; Supplemental Table 4. Subgroups of AIS patients younger or older than 65-year-old

Baseline characteristics, comorbidities, and laboratory findings among SARS-CoV-2 patients with an acute ischemic stroke, comparing those younger versus older than 65. **Blue ink indicates the post-hoc p values.**

| Parameter                                                              | Age <65-year-old<br>N = 148 (45.8%) | Age >65-year-old<br>N = 175 (54.2%) | P-value |
|------------------------------------------------------------------------|-------------------------------------|-------------------------------------|---------|
| Age; Mean (SD); Years                                                  | 54 ± 10                             | 79 ± 8                              | <0.001  |
| Age; Median [IQR]; Years                                               | 57 [49 - 62]                        | 77 [72 - 84]                        | <0.001  |
| Sex; Female; N (%)                                                     | 52 (35.1)                           | 78 (44.6)                           | 0.09    |
| Large Vessel Occlusion; N (%)                                          | 62 (47.3)                           | 64 (42.1)                           | 0.38    |
| Intravenous Thrombolysis; N (%)                                        | 29 (19.6)                           | 15 (8.6)                            | 0.004   |
| Mechanical Thrombectomy; N (%)                                         | 14 (9.5)                            | 10 (5.7)                            | 0.20    |
| National Institutes of Health Stroke Scale (NIHSS) Score; Median [IQR] | 8.0 [4.0 – 16.0]                    | 11.0 [5.0 – 20.0]                   | 0.15    |
| Imaging Patterns                                                       |                                     |                                     |         |
| Embollic/Large Vessel athero-Thromboembolism; N (%)                    | 94 (80.3)                           | 112 (80.6)                          | 0.31    |
| Lacune; N (%)                                                          | 9 (7.7)                             | 17 (12.2)                           |         |
| Border-zone; N (%)                                                     | 13 (11.1)                           | 10 (7.2)                            |         |
| Vasculitis Pattern; N (%)                                              | 1 (0.9)                             | 0 (0.0)                             |         |
| TOAST                                                                  |                                     |                                     |         |
| Large-Artery Atherosclerosis; N (%)                                    | 33 (38.8)                           | 23 (27.1)                           | 0.07    |
| Cardio-embolism; N (%)                                                 | 15 (17.6)                           | 21 (36.5) <sup>A (0.006)</sup>      |         |
| Small-Vessel Occlusion; N (%)                                          | 8 (9.4)                             | 9 (10.6)                            |         |
| Stroke of Other Determined Etiology; N (%)                             | 8 (9.4)                             | 5 (5.9)                             |         |
| Stroke of Undetermined Etiology; N (%)                                 | 21 (24.7)                           | 17 (20.0)                           |         |
| Interval Between Onset to Index Event; Median [IQR]; Days              | 4.0 [0.0 – 10.0]                    | 2.0 [0.0 – 8.0]                     | 0.10    |
| Mechanical Ventilation; N (%)                                          | 42 (28.4)                           | 43 (24.6)                           | 0.44    |
| Disposition*                                                           |                                     |                                     |         |
| Discharged Home; N (%)                                                 | 71 (52.2) <sup>B (0.002)</sup>      | 56 (34.8)                           | 0.01    |
| In Hospital Mortality; N (%)                                           | 29 (21.3)                           | 53 (32.9) <sup>A (0.03)</sup>       |         |
| Still in Hospital/Subacute Care; N (%)                                 | 36 (26.5)                           | 52 (32.3)                           |         |
| Length of Hospital Stay; Median (IQR); Days                            | 9.0 [5.0 – 18.0]                    | 7.0 [4.0 – 14.0]                    | 0.05    |
| Comorbidities                                                          |                                     |                                     |         |
| Hypertension; N (%)                                                    | 77 (52.4)                           | 125 (72.3)                          | <0.001  |
| Diabetes Mellitus; N (%)                                               | 54 (36.5)                           | 57 (32.9)                           | 0.51    |
| Ischemic Heart Disease; N (%)                                          | 25 (18.0)                           | 47 (29.9)                           | 0.02    |
| Atrial Fibrillation; N (%)                                             | 12 (8.2)                            | 33 (19.1)                           | 0.01    |
| Carotid Stenosis; N (%)                                                | 9 (6.5)                             | 29 (18.5)                           | 0.002   |

| Parameter                                                | Age <65-year-old<br>N = 148 (45.8%) | Age >65-year-old<br>N = 175 (54.2%) | P-value |
|----------------------------------------------------------|-------------------------------------|-------------------------------------|---------|
| Chronic Kidney Disease; N (%)                            | 24 (16.3)                           | 18 (10.4)                           | 0.12    |
| Cardiac Ejection Fraction <40%; N (%)                    | 6 (4.3)                             | 18 (11.5)                           | 0.03    |
| Active Neoplasm; N (%)                                   | 11 (7.9)                            | 10 (6.4)                            | 0.61    |
| Rheumatological Disease; N (%)                           | 1 (0.7)                             | 4 (2.5)                             | 0.22    |
| Prior Stroke or Transient Ischemic Attack; N (%)         | 1 (0.7)                             | 4 (2.5)                             | 0.22    |
| Smoking; N (%)                                           | 18 (12.2)                           | 35 (20.2)                           | 0.06    |
| <b>Laboratory Findings</b>                               |                                     |                                     |         |
| White Blood Cell Count x10 <sup>9</sup> /L; Mean (SD)    | 9.8 ± 4.7                           | 9.8 ± 5.0                           | 0.96    |
| White Blood Cell Count x10 <sup>9</sup> /L; Median [IQR] | 9.1 [7.2 – 11.3]                    | 8.9 [6.5 – 11.1]                    | 0.54    |
| Neutrophil Count x10 <sup>9</sup> /L; Mean (SD)          | 7.7 ± 4.2                           | 7.7 ± 4.7                           | 0.97    |
| Neutrophil Count x10 <sup>9</sup> /L; Median [IQR]       | 6.9 [4.9 – 9.2]                     | 6.5 [4.7 – 9.2]                     | 0.52    |
| Lymphocyte Count x10 <sup>9</sup> /L; Mean (SD)          | 1.8 ± 2.0                           | 1.6 ± 1.3                           | 0.32    |
| Lymphocyte x10 <sup>9</sup> /L; Median [IQR]             | 1.4 [1.0 – 2.0]                     | 1.3 [0.8 – 1.9]                     | 0.06    |
| Platelet Count x10 <sup>9</sup> /L; Mean (SD)            | 306.5 ± 218.5                       | 321.8 ± 571.5                       | 0.77    |
| Platelet Count x10 <sup>9</sup> /L; Median [IQR]         | 266.0 [177.0 – 381.0]               | 207.0 [154.0 – 300.0]               | 0.03    |
| Alanine Transaminase (ALT); Mean (SD); U/L               | 61.2 ± 81.1                         | 65.4 ± 91.4                         | 0.69    |
| Alanine Transaminase (ALT); Median [IQR]; U/L            | 26.9 [7.0 – 80.4]                   | 32.8 [12.0 – 96.0]                  | 0.54    |
| Aspartate Transaminase (AST); Mean (SD); U/L             | 27.2 ± 22.4                         | 36.5 ± 29.6                         | 0.003   |
| Aspartate Transaminase (AST); Median [IQR]; U/L          | 21.0 [12.0 – 35.0]                  | 27.0 [15.5 – 47.5]                  | 0.01    |
| Blood Urea Nitrogen (BUN); Mean (SD); mg/dl              | 61.4 ± 138.9                        | 45.4 ± 54.8                         | 0.21    |
| Blood Urea Nitrogen (BUN); Median [IQR]; mg/dl           | 32.5 [21.4 – 56.0]                  | 32.0 [20.0 – 47.0]                  | 1.00    |
| Creatinine; Mean (SD); mg/dl                             | 1.5 ± 2.2                           | 1.6 ± 1.2                           | 0.59    |
| Creatinine; Median [IQR]; mg/dl                          | 1.0 [0.8 – 1.3]                     | 1.2 [0.9 – 1.5]                     | 0.004   |
| C-Reactive Protein (CRP); Mean (SD); mg/L                | 70.0 ± 178.0                        | 53.0 ± 60.0                         | 0.27    |
| C-Reactive Protein (CRP); Median [IQR]; mg/L             | 35.0 [25.0 – 60.0]                  | 37.0 [24.0 – 55.0]                  | 0.95    |
| Lactate Dehydrogenase (LDH); Mean (SD); U/L              | 548.9 ± 788.5                       | 653.6 ± 1975.0                      | 0.68    |
| Lactate Dehydrogenase (LDH); Median [IQR]; U/L           | 420.0 [283.5 – 558.5]               | 358.0 [220.0 – 503.0]               | 0.14    |
| Fibrinogen; Mean (SD); mg/dl                             | 421.3 ± 674.7                       | 528.5 ± 1347.3                      | 0.64    |
| Fibrinogen; Median [IQR]; mg/dl                          | 346.0 [4.0 – 506.0]                 | 166.4 [22.9 – 464.0]                | 0.30    |
| D- Dimer; Mean (SD); ng/ml                               | 2417.5 ± 6626.8                     | 2874.2 ± 6284.3                     | 0.69    |
| D- Dimer; Median [IQR]; ng/ml                            | 830.0 [510.0 – 2085.0]              | 1100.0 [578.0 – 2430.0]             | 0.09    |

\* Data on patients' disposition were sparse.

## Results; Supplemental Table 5. Subgroups of AIS patients based on sex.

Baseline characteristics, comorbidities, and laboratory findings among SARS-CoV-2 patients with an acute ischemic stroke among female versus male patients. **Blue ink indicates the post-hoc p values.**

| Parameter                                                              | Female<br>N = 130 (40.2%)    | Male<br>N = 193 (59.8%) | P-value |
|------------------------------------------------------------------------|------------------------------|-------------------------|---------|
| Age; Mean (SD); Years                                                  | 68.8 ± 17.1                  | 66.1 ± 13.7             | 0.13    |
| Age; Median [IQR]; Years                                               | 73 [58 – 81]                 | 66 [58 – 76]            | 0.14    |
| Large Vessel Occlusion; N (%)                                          | 46 (39.3)                    | 80 (48.2)               | 0.14    |
| Intravenous Thrombolysis; N (%)                                        | 22 (16.9)                    | 22 (11.4)               | 0.16    |
| Mechanical Thrombectomy; N (%)                                         | 12 (9.2)                     | 12 (6.2)                | 0.31    |
| National Institutes of Health Stroke Scale (NIHSS) Score; Median [IQR] | 12.0 [5.0 – 19.0]            | 8.0 [4.0 – 16.0]        | <0.001  |
| Imaging Patterns                                                       |                              |                         |         |
| Embollic/Large Vessel athero-Thromboembolism; N (%)                    | 83 (81.4)                    | 123 (79.9)              | 0.49    |
| Lacune; N (%)                                                          | 11 (10.8)                    | 15 (9.7)                |         |
| Border-zone; N (%)                                                     | 7 (6.9)                      | 16 (10.4)               |         |
| Vasculitis Pattern; N (%)                                              | 1 (1.0)                      | 0 (0.0)                 |         |
| TOAST                                                                  |                              |                         |         |
| Large-Artery Atherosclerosis; N (%)                                    | 19 (28.4)                    | 27 (35.9)               | 0.05    |
| Cardio-embolism; N (%)                                                 | 21 (31.3)                    | 25 (24.3)               |         |
| Small-Vessel Occlusion; N (%)                                          | 3 (4.5)                      | 14 (13.6)               |         |
| Stroke of Other Determined Etiology; N (%)                             | 9 (13.4) <sup>B (0.02)</sup> | 4 (3.9)                 |         |
| Stroke of Undetermined Etiology; N (%)                                 | 15 (22.4)                    | 23 (22.3)               |         |
| Interval Between Onset to Index Event; Median [IQR]; Days              | 1.0 [0 – 8.0]                | 4.0 [0 – 9.0]           | 0.55    |
| Mechanical Ventilation; N (%)                                          | 35 (26.9)                    | 50 (25.9)               | 0.84    |
| Disposition*                                                           |                              |                         |         |
| Discharged Home; N (%)                                                 | 47 (39.2)                    | 80 (45.2)               | 0.59    |
| In Hospital Mortality; N (%)                                           | 35 (29.2)                    | 47 (26.6)               |         |
| Still in Hospital/Subacute Care; N (%)                                 | 38 (31.7)                    | 50 (28.2)               |         |
| Length of Hospital Stay; Median (IQR); Days                            | 7.0 [4.0 – 17.0]             | 7.0 [4.0 – 15.0]        | 0.10    |
| Comorbidities                                                          |                              |                         |         |
| Hypertension; N (%)                                                    | 80 (63.0)                    | 122 (63.2)              | 0.97    |
| Diabetes Mellitus; N (%)                                               | 46 (35.9)                    | 65 (33.7)               | 0.68    |
| Ischemic Heart Disease; N (%)                                          | 28 (23.9)                    | 44 (24.6)               | 0.90    |
| Atrial Fibrillation; N (%)                                             | 22 (17.3)                    | 23 (11.9)               | 0.17    |
| Carotid Stenosis; N (%)                                                | 14 (12.0)                    | 24 (13.4)               | 0.72    |
| Chronic Kidney Disease; N (%)                                          | 10 (7.9)                     | 32 (16.6)               | 0.02    |

| Parameter                                                | Female<br>N = 130 (40.2%) | Male<br>N = 193 (59.8%) | P-value |
|----------------------------------------------------------|---------------------------|-------------------------|---------|
| Cardiac Ejection Fraction <40%; N (%)                    | 12 (11.1)                 | 11 (6.1)                | 0.13    |
| Active Neoplasm; N (%)                                   | 7 (6.0)                   | 14 (6.8)                | 0.55    |
| Rheumatological Disease; N (%)                           | 1 (0.9)                   | 4 (2.2)                 | 0.37    |
| Prior Stroke or Transient Ischemic Attack; N (%)         | 2 (1.7)                   | 3 (1.7)                 | 0.98    |
| Smoking; N (%)                                           | 12 (9.4)                  | 41 (21.2)               | 0.01    |
| Laboratory Findings                                      |                           |                         |         |
| White Blood Cell Count x10 <sup>9</sup> /L; Mean (SD)    | 9.7 ± 5.0                 | 9.9 ± 4.7               | 0.80    |
| White Blood Cell Count x10 <sup>9</sup> /L; Median [IQR] | 8.8 [6.5 – 10.8]          | 9.1 [7.2 – 11.6]        | 0.64    |
| Neutrophil Count x10 <sup>9</sup> /L; Mean (SD)          | 7.7 ± 4.9                 | 7.7 ± 4.2               | 0.94    |
| Neutrophil Count x10 <sup>9</sup> /L; Median [IQR]       | 6.3 [4.6 – 9.2]           | 7.2 [4.9 – 9.4]         | 0.94    |
| Lymphocyte Count x10 <sup>9</sup> /L; Mean (SD)          | 1.6 ± 0.8                 | 1.7 ± 2.1               | 0.64    |
| Lymphocyte x10 <sup>9</sup> /L; Median [IQR]             | 1.5 [1.0 – 2.2]           | 1.3 [0.9 – 1.8]         | 0.24    |
| Platelet Count x10 <sup>9</sup> /L; Mean (SD)            | 284.9 ± 199.0             | 334.6 ± 546.7           | 0.35    |
| Platelet Count x10 <sup>9</sup> /L; Median [IQR]         | 242.0 [162.0 – 353.0]     | 221.0 [161.0 – 313.0]   | 0.90    |
| Alanine Transaminase (ALT); Mean (SD); U/L               | 47.4 ± 55.5               | 73.6 ± 100.2            | 0.01    |
| Alanine Transaminase (ALT); Median [IQR] ; U/L           | 22.4 [4.0 – 74.0]         | 33.0 [12.3 – 109.0]     | 0.05    |
| Aspartate Transaminase (AST); Mean (SD); U/L             | 32.1 ± 25.5               | 32.1 ± 27.7             | 0.98    |
| Aspartate Transaminase (AST); Median [IQR] ; U/L         | 25.0 [14.0 – 44.0]        | 23.0 [14.0 – 40.0]      | 0.42    |
| Blood Urea Nitrogen (BUN); Mean (SD); mg/dl              | 38.1 ± 36.0               | 63.4 ± 131.2            | 0.02    |
| Blood Urea Nitrogen (BUN); Median [IQR]; mg/dl           | 29.0 [19.0 – 41.0]        | 34.5 [22.0 – 56.5]      | 0.91    |
| Creatinine; Mean (SD); mg/dl                             | 1.4 ± 1.3                 | 1.6 ± 1.9               | 0.31    |
| Creatinine; Median [IQR]; mg/dl                          | 1.0 [0.8 – 1.5]           | 1.1 [0.9 – 1.5]         | 0.68    |
| C-Reactive Protein (CRP); Mean (SD); mg/L                | 49.7 ± 65.4               | 69.3 ± 131.2            | 0.23    |
| C-Reactive Protein (CRP); Median [IQR]; mg/L             | 33.0 [23.0 – 50.0]        | 40.0 [26.0 – 58.0]      | 0.33    |
| Lactate Dehydrogenase (LDH); Mean (SD); U/L              | 438.6 ± 353.6             | 696.8 ± 1894.5          | 0.33    |
| Lactate Dehydrogenase (LDH); Median [IQR]; U/L           | 349.5 [277.5 – 467.0]     | 414.5 [241.0 – 556.0]   | 0.13    |
| Fibrinogen; Mean (SD); mg/dl                             | 286.7 ± 227.9             | 562.3 ± 1216.6          | 0.23    |
| Fibrinogen; Median [IQR]; mg/dl                          | 346.0 [56.0 – 477.0]      | 218.0 [3.9 – 561.0]     | 0.68    |
| D- Dimer; Mean (SD); ng/ml                               | 2979.3 ± 6778.1           | 2470.6 ± 6258.5         | 0.67    |
| D- Dimer; Median [IQR]; ng/ml                            | 1057.0 [510.0 – 2200.0]   | 992 [568.0 – 2180.0]    | 0.92    |

\* Data on patients' disposition were sparse.

# **Results**

## **Acute Ischemic Stroke;**

### **Outcome Measures**

#### **Supplemental Tables 6-10**

## Results; Supplemental Table 6. Subgroups of AIS patients according to the TOAST criteria

Baseline characteristics, comorbidities, and laboratory findings among SARS-CoV-2 patients with an acute ischemic stroke, based on TOAST classification subgroups. [Blue ink indicates the post-hoc p values.](#)

| Parameter                                                              | A: Large Artery Atherosclerosis<br>N = 56 (32.9%)                                                        | B: Cardio-embolism<br>N = 46 (27.1%)       | C: Small artery occlusion<br>N = 17 (10.0%)                                                              | D: Other Determined<br>N = 13 (7.6%)                               | E: Undetermined<br>N = 38 (22.4%)          | P-value |
|------------------------------------------------------------------------|----------------------------------------------------------------------------------------------------------|--------------------------------------------|----------------------------------------------------------------------------------------------------------|--------------------------------------------------------------------|--------------------------------------------|---------|
| Age; Mean (SD); Years                                                  | 63 ± 15                                                                                                  | 72 ± 14<br><a href="#">D (0.021)</a>       | 67 ± 18                                                                                                  | 57 ± 16                                                            | 65 ± 18                                    | 0.01    |
| Age; Median [IQR]; Years                                               | 64.0 [56.0 – 73.0]                                                                                       | 75.0 [62.0 – 81.0]                         | 75.0 [58.0 – 78.0]                                                                                       | 54.0 [40.0 – 72.0]                                                 | 64.0 [51.0 – 80.0]                         | 0.07    |
| Sex; Female; N (%)                                                     | 19 (33.9)                                                                                                | 21 (45.7)                                  | 3 (17.6)                                                                                                 | 9 (69.2)<br><a href="#">C (0.043)</a>                              | 15 (39.5)                                  | 0.05    |
| Large Vessel Occlusion; N (%)                                          | 46 (85.2)<br><a href="#">B (0.003)</a><br><a href="#">D (&lt;0.001)</a><br><a href="#">E (&lt;0.001)</a> | 24 (53.3)                                  | 0 (0.0)                                                                                                  | 2 (18.2)                                                           | 7 (20.0)                                   | <0.001  |
| Intravenous Thrombolysis; N (%)                                        | 14 (25.0)                                                                                                | 8 (17.4)                                   | 0 (0.0)                                                                                                  | 2 (15.4)                                                           | 4 (10.5)                                   | 0.12    |
| Mechanical Thrombectomy; N (%)                                         | 10 (17.9)                                                                                                | 10 (21.7)                                  | 0 (0.0)                                                                                                  | 1 (7.7)                                                            | 2 (5.3)                                    | 0.07    |
| National Institutes of Health Stroke Scale (NIHSS) Score; Median [IQR] | 9.0 [5.0 – 17.0]                                                                                         | 13.0 [8.0 -20.0]                           | 4.0 [2.0 -8.0]                                                                                           | 14.0 [6.0 – 18.0]                                                  | 7.0 [3.0 – 17.0]                           | 0.10    |
| Imaging Patterns                                                       |                                                                                                          |                                            |                                                                                                          |                                                                    |                                            |         |
| Embolic/Large Vessel athero-Thromboembolism; N (%)                     | 54 (96.4)<br><a href="#">C (&lt;0.001)</a><br><a href="#">D (0.017)</a>                                  | 43 (93.5)<br><a href="#">C (&lt;0.001)</a> | 4 (23.5)                                                                                                 | 9 (69.2)                                                           | 34 (89.5)<br><a href="#">C (&lt;0.001)</a> | <0.001  |
| Lacune; N (%)                                                          | 0 (0.0)                                                                                                  | 1 (2.2)                                    | 13 (76.5)<br><a href="#">B (&lt;0.001)</a><br><a href="#">D (0.001)</a><br><a href="#">E (&lt;0.001)</a> | 1 (7.7)                                                            | 4 (10.5)                                   |         |
| Border-zone; N (%)                                                     | 2 (3.6)                                                                                                  | 1 (2.2)                                    | 0 (0.0)                                                                                                  | 3 (23.1)<br><a href="#">A (0.044)</a><br><a href="#">B (0.024)</a> | 0 (0.0)                                    |         |
| Vasculitis Pattern; N (%)                                              | 0 (0.0)                                                                                                  | 1 (2.2)                                    | 0 (0.0)                                                                                                  | 0 (0.0)                                                            | 0 (0.0)                                    |         |
| Interval Between Onset to Index Event; Median [IQR]; Days              | 4.0 [1.0 – 10.0]                                                                                         | 2.0 [0.0 – 11.0]                           | 2.0 [0.0 – 6.0]                                                                                          | 10.0 [4.0 – 17.0]                                                  | 4.0 [0.0 – 12.0]                           | 0.12    |
| Mechanical Ventilation; N (%)                                          | 22 (29.3)                                                                                                | 10 (21.7)                                  | 4 (23.5)                                                                                                 | 9 (69.2)                                                           | 11 (28.9)                                  | 0.02    |
| Disposition*                                                           |                                                                                                          |                                            |                                                                                                          |                                                                    |                                            |         |
| Discharged Home; N (%)                                                 | 24 (42.9)                                                                                                | 16 (34.8)                                  | 11 (64.7)                                                                                                | 8 (61.5)                                                           | 9 (24.3)                                   | 0.12    |
| In Hospital Mortality; N (%)                                           | 14 (25.0)                                                                                                | 13 (28.3)                                  | 3 (17.6)                                                                                                 | 2 (15.4)                                                           | 9 (24.3)                                   |         |
| Still in Hospital/Subacute Care; N (%)                                 | 18 (32.1)                                                                                                | 17 (37.0)                                  | 3 (17.6)                                                                                                 | 3 (23.1)                                                           | 19 (54.1)                                  |         |
| Length of Hospital Stay; Median (IQR); Days                            | 6.0 [4.0 – 15.0]                                                                                         | 7.0 [5.0 -14.0]                            | 7.0 [5.0 – 16.0]                                                                                         | 20.0 [4.0 – 35.0]                                                  | 8.0 [6.0 – 26.0]                           | 0.17    |
| Comorbidities                                                          |                                                                                                          |                                            |                                                                                                          |                                                                    |                                            |         |
| Hypertension; N (%)                                                    | 30 (53.6)                                                                                                | 35 (76.1)<br><a href="#">D (0.023)</a>     | 10 (58.8)                                                                                                | 4 (30.8)                                                           | 25 (65.8)                                  | 0.03    |
| Diabetes Mellitus; N (%)                                               | 20 (35.7)                                                                                                | 15 (32.6)                                  | 6 (35.3)                                                                                                 | 1 (7.7)                                                            | 12 (31.6)                                  | 0.41    |
| Ischemic Heart Disease; N (%)                                          | 11 (19.6)                                                                                                | 21 (45.7)                                  | 3 (17.6)                                                                                                 | 1 (7.7)                                                            | 2 (5.3)                                    | <0.001  |

| Parameter                                                | A: Large Artery Atherosclerosis<br>N = 56 (32.9%) | B: Cardio-embolism<br>N = 46 (27.1%)  | C: Small artery occlusion<br>N = 17 (10.0%) | D: Other Determined<br>N = 13 (7.6%) | E:<br>Undetermined<br>N = 38 (22.4%) | P-value |
|----------------------------------------------------------|---------------------------------------------------|---------------------------------------|---------------------------------------------|--------------------------------------|--------------------------------------|---------|
|                                                          |                                                   | A (0.048)<br>E (<0.001)               |                                             |                                      |                                      |         |
| Atrial Fibrillation; N (%)                               | 2 (3.6)                                           | 23 (50.0)<br>A (<0.001)<br>E (<0.001) | 4 (23.5)                                    | 1 (7.7)                              | 1 (2.6)                              | <0.001  |
| Carotid Stenosis; N (%)                                  | 16 (28.6)<br>E (0.029)                            | 6 (13.0)                              | 1 (5.9)                                     | 0 (0.0)                              | 2 (5.3)                              | 0.01    |
| Chronic Kidney Disease; N (%)                            | 8 (14.3)                                          | 3 (6.5)                               | 6 (35.3)<br>B (0.038)                       | 1 (7.7)                              | 3 (7.9)                              | 0.03    |
| Cardiac Ejection Fraction <40%; N (%)                    | 5 (8.9)                                           | 8 (17.4)                              | 1 (5.9)                                     | 1 (7.7)                              | 5 (13.2)                             | 0.61    |
| Active Neoplasm; N (%)                                   | 2 (3.6)                                           | 9 (19.6)<br>A (0.029)                 | 1 (5.9)                                     | 0 (0.0)                              | 0 (0.0)                              | <0.001  |
| Rheumatological Disease; N (%)                           | 0 (0.0)                                           | 3 (6.5)                               | 1 (5.9)                                     | 0 (0.0)                              | 0 (0.0)                              | 0.32    |
| Prior Stroke or Transient Ischemic Attack; N (%)         | 0 (0.0)                                           | 0 (0.0)                               | 0 (0.0)                                     | 0 (0.0)                              | 1 (2.6)                              | 0.48    |
| Smoking; N (%)                                           | 11 (19.6)                                         | 5 (10.9)                              | 2 (11.8)                                    | 0 (0.0)                              | 4 (10.5)                             | 0.34    |
| Laboratory Findings                                      |                                                   |                                       |                                             |                                      |                                      |         |
| White Blood Cell Count x10 <sup>9</sup> /L; Mean (SD)    | 10.2 ± 5.5                                        | 10.3 ± 4.5                            | 9.9 ± 2.5                                   | 11.6 ± 8.1                           | 8.5 ± 3.9                            | 0.29    |
| White Blood Cell Count x10 <sup>9</sup> /L; Median [IQR] | 9.1 [7.1 – 11.3]                                  | 9.8 [7.7 – 12.5]                      | 9.0 [7.9 – 11.8]                            | 9.3 [5.0 – 17.1]                     | 7.7 [5.9 – 10.2]                     | 0.16    |
| Neutrophil Count x10 <sup>9</sup> /L; Mean (SD)          | 8.4 ± 4.8                                         | 7.9 ± 4.5                             | 8.0 ± 2.7                                   | 9.7 ± 7.7                            | 6.5 ± 3.7                            | 0.24    |
| Neutrophil Count x10 <sup>9</sup> /L; Median [IQR]       | 7.2 [5.4 – 9.2]                                   | 8.0 [4.8 – 10.2]                      | 7.0 [6.0 – 10.0]                            | 7.4 [3.5 – 14.2]                     | 5.9 [4.2 – 8.2]                      | 0.16    |
| Lymphocyte Count x10 <sup>9</sup> /L; Mean (SD)          | 1.5 ± 2.3                                         | 2.1 ± 1.3                             | 2.0 ± 2.1                                   | 1.5 ± 0.7                            | 2.1 ± 1.9                            | 0.35    |
| Lymphocyte x10 <sup>9</sup> /L; Median [IQR]             | 1.1 [0.8 – 1.5]                                   | 1.9 [1.2 – 2.6]                       | 1.2 [1.0 – 2.0]                             | 1.5 [0.9 – 2.2]                      | 1.4 [1.0 – 2.6]                      | <0.001  |
| Platelet Count x10 <sup>9</sup> /L; Mean (SD)            | 258.0 ± 134.4                                     | 503.5 ± 992.7                         | 220.7 ± 151.3                               | 343.9 ± 166.9                        | 416.6 ± 431.2                        | 0.20    |
| Platelet Count x10 <sup>9</sup> /L; Median [IQR]         | 223.0 [165.0 – 312.0]                             | 232.0 [155.0 – 320.0]                 | 179.5 [107.5 – 273.5]                       | 338.0 [244.0 – 429.0]                | 249.0 [196.0 – 395.0]                | 0.04    |
| Alanine Transaminase (ALT); Mean (SD); U/L               | 63.5 ± 78.4                                       | 35.5 ± 53.3                           | 51.0 ± 60.0                                 | 44.9 ± 75.5                          | 66.5 ± 81.2                          | 0.29    |
| Alanine Transaminase (ALT); Median [IQR]; U/L            | 33.9 [8.0 – 85.0]                                 | 14.0 [4.0 – 31.0]                     | 44.0 [9.0 – 62.0]                           | 4.8 [1.2 – 43.7]                     | 29.7 [10.9 – 104.3]                  | 0.08    |
| Aspartate Transaminase (AST); Mean (SD); U/L             | 36.5 ± 34.4                                       | 30.3 ± 23.0                           | 25.4 ± 13.9                                 | 34.7 ± 38.3                          | 24.3 ± 19.1                          | 0.26    |
| Aspartate Transaminase (AST); Median [IQR]; U/L          | 23.0 [12.0 – 44.2]                                | 25.0 [12.0 – 43.0]                    | 19.0 [14.0 – 38.3]                          | 38.0 [19.0 – 52.0]                   | 33.0 [24.0 – 50.0]                   | 0.72    |
| Blood Urea Nitrogen (BUN); Mean (SD); mg/dl              | 47.9 ± 51.1                                       | 46.2 ± 63.6                           | 43.0 ± 50.1                                 | 39.3 ± 26.0                          | 86.6 ± 260.6                         | 0.60    |
| Blood Urea Nitrogen (BUN); Median [IQR]; mg/dl           | 33.0 [21.0 – 56.0]                                | 30.5 [19.0 – 50.0]                    | 28.0 [20.0 – 34.0]                          | 38.0 [19.0 – 52.0]                   | 33.0 [24.0 – 50.0]                   | 0.79    |
| Creatinine; Mean (SD); mg/dl                             | 1.3 ± 0.8                                         | 1.1 ± 0.3                             | 1.6 ± 1.4                                   | 1.3 ± 1.2                            | 1.4 ± 1.2                            | 0.43    |
| Creatinine; Median [IQR]; mg/dl                          | 1.0 [0.8 – 1.3]                                   | 1.0 [0.9 – 1.3]                       | 1.3 [1.1 – 1.4]                             | 0.8 [0.6 – 1.2]                      | 1.0 [0.8 – 1.3]                      | 0.05    |
| C-Reactive Protein (CRP); Mean (SD); mg/L                | 47.0 ± 52.0                                       | 49.0 ± 58.0                           | 35.0 ± 18.0                                 | 42.0 ± 25.0                          | 107 ± 325                            | 0.37    |

| Parameter                                      | A: Large Artery Atherosclerosis<br>N = 56 (32.9%) | B: Cardio-embolism<br>N = 46 (27.1%) | C: Small artery occlusion<br>N = 17 (10.0%) | D: Other Determined<br>N = 13 (7.6%) | E: Undetermined<br>N = 38 (22.4%) | P-value |
|------------------------------------------------|---------------------------------------------------|--------------------------------------|---------------------------------------------|--------------------------------------|-----------------------------------|---------|
| C-Reactive Protein (CRP); Median [IQR]; mg/L   | 41.0 [25.0 – 52.0]                                | 36.0 [21.0 – 45.0]                   | 30.0 [23.0 – 44.0]                          | 37.0 [23.0 – 60.0]                   | 36.0 [26.0 – 72.0]                | 0.75    |
| Lactate Dehydrogenase (LDH); Mean (SD); U/L    | 1064.6 ± 2880.1                                   | 542.6 ± 1114.4                       | 371.2 ± 202.7                               | 474.7 ± 472.4                        | 321.5 ± 185.6                     | 0.53    |
| Lactate Dehydrogenase (LDH); Median [IQR]; U/L | 458.0 [319.0 – 668.5]                             | 315.0 [224.0 – 454.0]                | 268.0 [203.0 – 600.0]                       | 337.0 [201.0 – 610.0]                | 326.0 [185.0 – 426.0]             | 0.18    |
| Fibrinogen; Mean (SD); mg/dl                   | 522.7 ± 1054.0                                    | 674.7 ± 1839.4                       | 779.5 ± 918.3                               | 157.2 ± 156.1                        | 217.4 ± 338.1                     | 0.73    |
| Fibrinogen; Median [IQR]; mg/dl                | 76.0 [1.95 – 477.0]                               | 200.5 [3.75 – 446.5]                 | 429.5 [261.5 – 1297.5]                      | 104.0 [2.7 – 353.0]                  | 57.5 [4.0 – 220.0]                | 0.48    |
| D- Dimer; Mean (SD); ng/ml                     | 919.6 ± 956.4                                     | 2019.6 ± 2694.8                      | 820.7 ± 593.0                               | 1257.3 ± 761.9                       | 1386.8 ± 1196.6                   | 0.25    |
| D- Dimer; Median [IQR]; ng/ml                  | 486.5 [371.5 – 1422.5]<br>B (0.039)               | 1100.0 [955.0 – 2355.0]              | 730.0 [480.0 – 1100.0]                      | 949.5 [625.0 – 2200.0]               | 932.5 [513.5 – 2000.5]            | 0.03    |

\* Data on patients' disposition were sparse.



## Results; Supplemental Table 7. Subgroups of AIS patients according to the NIHSS scores.

Baseline characteristics, comorbidities, and laboratory findings among SARS-CoV-2 patients with an acute ischemic stroke, based on NIHSS scores. [Blue ink indicates the post-hoc p values.](#)

| Parameter                                                 | A: No Stroke Symptoms<br>(NIHSS = 0)<br>N = 20 (7.5%) | B: Minor Stroke<br>(NIHSS = 1 to 4)<br>N = 49 (18.4%) | C: Moderate Stroke<br>(NIHSS 5 to 15)<br>N = 117 (43.8%) | D: Moderate to Severe Stroke<br>(NIHSS = 16 to 20)<br>N = 35 (13.1%) | E: Severe Stroke<br>(NIHSS = 21 to 42)<br>N = 46 (17.2%)                              | P value |
|-----------------------------------------------------------|-------------------------------------------------------|-------------------------------------------------------|----------------------------------------------------------|----------------------------------------------------------------------|---------------------------------------------------------------------------------------|---------|
| Age; Mean (SD); Years                                     | 67 ± 13                                               | 65 ± 17                                               | 66 ± 15                                                  | 66 ± 16                                                              | 69 ± 15                                                                               | 0.77    |
| Age; Median [IQR]; Years                                  | 65 [60 – 76]                                          | 65 [55 – 75]                                          | 66 [56 – 77]                                             | 67 [57 – 78]                                                         | 72 [60 – 81]                                                                          | 0.65    |
| Sex; Female; N (%)                                        | 6 (30.0)                                              | 20 (40.8)                                             | 44 (37.6)                                                | 16 (45.7)                                                            | 22 (47.8)                                                                             | 0.60    |
| Large Vessel Occlusion; N (%)                             | 1 (8.3)                                               | 8 (17.0)                                              | 49 (44.5) <sup>B (0.01)</sup>                            | 23 (67.6) <sup>A (0.004)</sup><br><sup>B (&lt;0.001)</sup>           | 31 (75.6) <sup>A (&lt;0.001)</sup><br><sup>B (&lt;0.001)</sup><br><sup>C (0.01)</sup> | <0.001  |
| Intravenous Thrombolysis; N (%)                           | 0 (0.0)                                               | 2 (4.1)                                               | 25 (21.4) <sup>B (0.04)</sup>                            | 11 (31.4) <sup>B (0.004)</sup>                                       | 5 (10.9)                                                                              | <0.001  |
| Mechanical Thrombectomy; N (%)                            | 0 (0.0)                                               | 1 (2.0)                                               | 8 (6.8)                                                  | 9 (25.7) <sup>B (0.01)</sup><br><sup>C (0.01)</sup>                  | 6 (13.0)                                                                              | <0.001  |
| Imaging Patterns                                          |                                                       |                                                       |                                                          |                                                                      |                                                                                       |         |
| Embolic/Large Vessel athero-Thromboembolism; N (%)        | 4 (57.1)                                              | 31 (73.8)                                             | 85 (81.7)                                                | 24 (75.0)                                                            | 39 (92.9)                                                                             | <0.001  |
| Lacune; N (%)                                             | 2 (28.6)                                              | 8 (19.0)                                              | 10 (9.6)                                                 | 1 (3.1)                                                              | 1 (2.4)                                                                               |         |
| Border-zone; N (%)                                        | 0 (0.0)                                               | 3 (7.1)                                               | 9 (8.7)                                                  | 7 (21.9)                                                             | 2 (4.8)                                                                               |         |
| Vasculitis Pattern; N (%)                                 | 1 (14.3)                                              | 0 (0.0)                                               | 0 (0.0)                                                  | 0 (0.0)                                                              | 0 (0.0)                                                                               |         |
| TOAST                                                     |                                                       |                                                       |                                                          |                                                                      |                                                                                       |         |
| Large-Artery Atherosclerosis; N (%)                       | 1 (14.3)                                              | 9 (25.7)                                              | 30 (43.5)                                                | 5 (19.2)                                                             | 11 (36.7)                                                                             | 0.03    |
| Cardio-embolism; N (%)                                    | 2 (28.6)                                              | 5 (14.3)                                              | 17 (24.6)                                                | 13 (50.0) <sup>B (0.03)</sup>                                        | 8 (26.7)                                                                              |         |
| Small-Vessel occlusion; N (%)                             | 1 (14.3)                                              | 9 (25.7)                                              | 30 (43.5)                                                | 5 (19.2)                                                             | 11 (36.7)                                                                             |         |
| Stroke of Other Determined Etiology; N (%)                | 0 (0.0)                                               | 3 (8.6)                                               | 3 (4.3)                                                  | 4 (15.4)                                                             | 2 (6.7)                                                                               |         |
| Stroke of Undetermined Etiology; N (%)                    | 3 (42.9)                                              | 10 (28.6)                                             | 13 (18.8)                                                | 4 (15.4)                                                             | 7 (23.3)                                                                              |         |
| Interval Between Onset to Index Event; Median [IQR]; Days | 3.0 [0.0 – 12.0]                                      | 3.0 [0.0 – 10.0]                                      | 4.0 [1.0 – 8.0]                                          | 3.0 [0.0 – 10.0]                                                     | 1.0 [0.0 – 10.0]                                                                      | 0.64    |

| Parameter                                                | A: No Stroke Symptoms<br>(NIHSS = 0)<br>N = 20 (7.5%) | B: Minor Stroke<br>(NIHSS = 1 to 4)<br>N = 49 (18.4%) | C: Moderate Stroke<br>(NIHSS 5 to 15)<br>N = 117 (43.8%) | D: Moderate to Severe Stroke<br>(NIHSS = 16 to 20)<br>N = 35 (13.1%) | E: Severe Stroke<br>(NIHSS = 21 to 42)<br>N = 46 (17.2%)   | P value |
|----------------------------------------------------------|-------------------------------------------------------|-------------------------------------------------------|----------------------------------------------------------|----------------------------------------------------------------------|------------------------------------------------------------|---------|
| Mechanical Ventilation; N (%)                            | 2 (10.0)                                              | 8 (16.3)                                              | 25 (21.4)                                                | 12 (34.3)                                                            | 29 (63.0) <sup>A (0.001)</sup><br>B (<0.001)<br>C (<0.001) | <0.001  |
| Disposition*                                             |                                                       |                                                       |                                                          |                                                                      |                                                            |         |
| Discharged Home; N (%)                                   | 5 (62.5)                                              | 28 (62.2) <sup>D (0.001)</sup><br>E (0.001)           | 52 (47.3) <sup>D (0.24)</sup><br>E (0.02)                | 6 (17.6)                                                             | 9 (20.5)                                                   | <0.001  |
| In Hospital Mortality; N (%)                             | 1 (12.5)                                              | 5 (11.1)                                              | 18 (16.4)                                                | 19 (55.9) <sup>B (&lt;0.001)</sup><br>C (<0.001)                     | 23 (52.3) <sup>B (&lt;0.001)</sup><br>C (<0.001)           |         |
| Still in Hospital/Subacute Care; N (%)                   | 2 (25.0)                                              | 12 (26.7)                                             | 40 (36.4)                                                | 9 (26.5)                                                             | 12 (27.3)                                                  |         |
| Length of Hospital Stay; Median (IQR); Days              | 8.0 [2.0 – 22.0]                                      | 6.0 [4.0 – 12.0]                                      | 9.0 [5.0 – 17.0]                                         | 6.0 [4.0 – 14.0]                                                     | 7.0 [5.0 – 15.0]                                           | 0.44    |
| Comorbidities                                            |                                                       |                                                       |                                                          |                                                                      |                                                            |         |
| Hypertension; N (%)                                      | 14 (73.7)                                             | 34 (69.4)                                             | 78 (66.7)                                                | 23 (65.7)                                                            | 29 (60.9)                                                  | 0.86    |
| Diabetes Mellitus; N (%)                                 | 9 (45.0)                                              | 13 (26.5)                                             | 41 (35.0)                                                | 13 (37.1)                                                            | 16 (34.8)                                                  | 0.65    |
| Ischemic Heart Disease; N (%)                            | 1 (10.0)                                              | 2 (4.3)                                               | 33 (29.7) <sup>B (0.01)</sup>                            | 12 (36.4) <sup>B (0.002)</sup>                                       | 11 (26.2) <sup>B (0.04)</sup>                              | <0.001  |
| Atrial Fibrillation; N (%)                               | 4 (21.1)                                              | 4 (8.2)                                               | 12 (10.3)                                                | 11 (31.4) <sup>C (0.02)</sup>                                        | 9 (17.4)                                                   | 0.02    |
| Carotid Stenosis; N (%)                                  | 0 (0.0)                                               | 10 (21.7)                                             | 16 (14.4)                                                | 3 (9.1)                                                              | 7 (16.7)                                                   | 0.35    |
| Chronic Kidney Disease; N (%)                            | 3 (15.8)                                              | 8 (16.3)                                              | 16 (13.7)                                                | 7 (20.0)                                                             | 3 (6.5)                                                    | 0.48    |
| Cardiac Ejection Fraction <40%; N (%)                    | 2 (20.0)                                              | 3 (6.5)                                               | 9 (8.1)                                                  | 2 (6.1)                                                              | 4 (9.5)                                                    | 0.68    |
| Active Neoplasm; N (%)                                   | 0 (0.0)                                               | 0 (0.0)                                               | 11 (9.9)                                                 | 3 (9.1)                                                              | 3 (7.1)                                                    | 0.21    |
| Rheumatological Disease; N (%)                           | 0 (0.0)                                               | 1 (2.2)                                               | 3 (2.7)                                                  | 1 (3.0)                                                              | 0 (0.0)                                                    | 0.83    |
| Prior Stroke or Transient Ischemic Attack; N (%)         | 0 (0.0)                                               | 0 (0.0)                                               | 1 (0.9)                                                  | 0 (0.0)                                                              | 0 (0.0)                                                    | 0.88    |
| Smoking; N (%)                                           | 2 (10.5)                                              | 8 (16.3)                                              | 22 (18.8)                                                | 5 (14.3)                                                             | 6 (13.0)                                                   | 0.83    |
| Laboratory Findings                                      |                                                       |                                                       |                                                          |                                                                      |                                                            |         |
| White Blood Cell Count x10 <sup>9</sup> /L; Mean (SD)    | 8.6 ± 3.5                                             | 9.6 ± 5.6                                             | 9.8 ± 4.4                                                | 9.2 ± 4.1                                                            | 11.1 ± 5.0                                                 | 0.24    |
| White Blood Cell Count x10 <sup>9</sup> /L; Median [IQR] | 7.7 [6.7 – 9.8]                                       | 7.7 [6.3 – 9.9]                                       | 8.9 [6.9 – 11.3]                                         | 9.3 [7.2 – 10.7]                                                     | 10.5 [8.1 – 12.7]                                          | 0.03    |

| Parameter                                          | A: No Stroke Symptoms<br>(NIHSS = 0)<br>N = 20 (7.5%) | B: Minor Stroke<br>(NIHSS = 1 to 4)<br>N = 49 (18.4%) | C: Moderate Stroke<br>(NIHSS 5 to 15)<br>N = 117 (43.8%) | D: Moderate to Severe Stroke<br>(NIHSS = 16 to 20)<br>N = 35 (13.1%) | E: Severe Stroke<br>(NIHSS = 21 to 42)<br>N = 46 (17.2%) | P value |
|----------------------------------------------------|-------------------------------------------------------|-------------------------------------------------------|----------------------------------------------------------|----------------------------------------------------------------------|----------------------------------------------------------|---------|
|                                                    | E (0.001)                                             |                                                       |                                                          |                                                                      |                                                          |         |
| Neutrophil Count x10 <sup>9</sup> /L; Mean (SD)    | 7.0 ± 3.6                                             | 7.2 ± 5.1                                             | 7.9 ± 4.4                                                | 7.4 ± 3.7                                                            | 8.5 ± 4.2                                                | 0.56    |
| Neutrophil Count x10 <sup>9</sup> /L; Median [IQR] | 6.2 [5.1 – 8.6]                                       | 6.0 [4.5 – 8.2]                                       | 7.2 [5.0 – 9.1]                                          | 7.1 [4.8 – 9.2]                                                      | 8.4 [5.3 – 10.5]                                         | 0.16    |
| Lymphocyte Count x10 <sup>9</sup> /L; Mean (SD)    | 1.4 ± 1.5                                             | 1.7 ± 1.1                                             | 1.6 ± 1.2                                                | 2.1 ± 2.9                                                            | 1.9 ± 2.4                                                | 0.68    |
| Lymphocyte x10 <sup>9</sup> /L; Median [IQR]       | 1.1 [0.8 – 1.4]                                       | 1.3 [1.0 – 2.2]                                       | 1.4 [0.9 – 1.9]                                          | 1.4 [0.9 – 2.1]                                                      | 1.3 [0.8 – 2.0]                                          | 0.42    |
| Platelet Count x10 <sup>9</sup> /L; Mean (SD)      | 419.9 ± 714.5                                         | 379.0 ± 395.7                                         | 334.2 ± 609.9                                            | 281.5 ± 129.4                                                        | 264.8 ± 115.7                                            | 0.68    |
| Platelet Count x10 <sup>9</sup> /L; Median [IQR]   | 220.0 [177.0 – 390.0]                                 | 263.5 [169.0 – 395.0]                                 | 205.0 [149.0 – 313.0]                                    | 239.0 [171.0 – 397.0]                                                | 247.0 [190.0 – 348.0]                                    | 0.32    |
| Alanine Transaminase (ALT); Mean (SD); U/L         | 105.6 ± 177.7                                         | 34.5 ± 45.9                                           | 63.9 ± 80.3                                              | 58.0 ± 84.3                                                          | 50.1 ± 51.2                                              | 0.04    |
| Alanine Transaminase (ALT); Median [IQR]; U/L      | 28.8 [15.3 – 153.7]                                   | 16.7 [4.0 – 49.0]                                     | 28.7 [11.0 – 82.5]                                       | 36.5 [3.1 – 75.0]                                                    | 26.4 [4.6 – 110.0]                                       | 0.24    |
| Aspartate Transaminase (AST); Mean (SD); U/L       | 30.9 ± 22.3                                           | 23.6 ± 20.2                                           | 33.1 ± 26.2                                              | 28.1 ± 23.7                                                          | 41.5 ± 32.7                                              | 0.02    |
| Aspartate Transaminase (AST); Median [IQR]; U/L    | 25.0 [14.0 – 40.0]                                    | 22.4 [12.4 – 31.8]                                    | 25.0 [14.2 – 42.0]                                       | 21.0 [10.7 – 39.0]                                                   | 28.9 [15.0 – 57.0]                                       | 0.08    |
| Blood Urea Nitrogen (BUN); Mean (SD); mg/dl        | 61.3 ± 50.5                                           | 50.0 ± 66.8                                           | 46.5 ± 45.6                                              | 33.9 ± 20.8                                                          | 39.5 ± 39.0                                              | 0.32    |
| Blood Urea Nitrogen (BUN); Median [IQR]; mg/dl     | 43.0 [29.0 – 71.0]                                    | 32.5 [23.0 – 47.0]                                    | 31.5 [21.0 – 54.0]                                       | 31.0 [15.0 – 46.0]                                                   | 33.0 [16.0 – 48.0]                                       | 0.33    |
| Creatinine; Mean (SD); mg/dl                       | 1.5 ± 1.2                                             | 1.0 ± 0.3                                             | 1.5 ± 1.3                                                | 1.2 ± 0.9                                                            | 1.6 ± 1.1                                                | 0.05    |
| Creatinine; Median [IQR]; mg/dl                    | 1.0 [0.9 – 1.3]<br>B (0.039)                          | 0.9 [0.8 – 1.2]<br>E (0.021)                          | 1.2 [0.9 – 1.5]                                          | 1.0 [0.8 – 1.2]                                                      | 1.2 [0.9 – 1.6]                                          | <0.001  |
| C-Reactive Protein (CRP); Mean (SD); mg/L          | 57.0 ± 41.0                                           | 46.0 ± 52.0                                           | 50.0 ± 51.0                                              | 45.0 ± 31.0                                                          | 47.0 ± 40.0                                              | 0.91    |
| C-Reactive Protein (CRP); Median [IQR]; mg/L       | 43.0 [29.0 – 75.0]                                    | 35.0 [23.0 – 49.0]                                    | 37.0 [24.0 – 51.0]                                       | 35.0 [24.0 – 55.0]                                                   | 36.0 [26.0 – 56.0]                                       | 0.83    |
| Lactate Dehydrogenase (LDH); Mean (SD); U/L        | 531.6 ± 254.9                                         | 551.9 ± 1136.0                                        | 457.2 ± 707.3                                            | 511.9 ± 412.3                                                        | 1119.4 ± 3301.0                                          | 0.57    |
| Lactate Dehydrogenase (LDH); Median [IQR]; U/L     | 523.0 [312.0 – 736.0]                                 | 324.0 [203.0 – 483.0]                                 | 344.0 [200.0 – 490.0]                                    | 404.0 [241.0 – 681.0]                                                | 399.5 [315.0 – 490.0]                                    | 0.19    |
| Fibrinogen; Mean (SD); mg/dl                       | 509.3 ± 196.3                                         | 409.1 ± 740.9                                         | 575.3 ± 1556.1                                           | 133.9 ± 149.3                                                        | 465.0 ± 298.2                                            | 0.88    |
| Fibrinogen; Median [IQR]; mg/dl                    | 563.0 [438.0 – 626.0]<br>B (0.032)<br>D (0.010)       | 44.0 [3.5 – 403.0]                                    | 58.0 [2.5 – 400.0]                                       | 76.0 [2.5 – 216.0]                                                   | 419.0 [366.0 – 477.0]                                    | 0.01    |
| D- Dimer; Mean (SD); ng/ml                         | 7020.9 ± 11983.6                                      | 1025.6 ± 1087.5                                       | 3277.8 ± 9087.7                                          | 1757.3 ± 952.1                                                       | 2033.5 ± 3027.9                                          | 0.08    |
| D- Dimer; Median [IQR]; ng/ml                      | 2343.0 [821.0 – 3477.0]                               | 651.0 [347.0 – 1402.0]                                | 950.0 [510.0 – 2165.0]                                   | 2048.0 [626.0 – 2448.0]                                              | 1100.0 [629.0 – 2175.0]                                  | 0.02    |

\* Data on patients' disposition were sparse.

**Results; Supplemental Table 8. Subgroups of AIS patients according to the presence or absence of large vessel occlusion.**

Baseline characteristics, comorbidities, and laboratory findings among SARS-CoV-2 patients with an acute ischemic stroke, based on the absence versus presence of large vessel occlusion. [Blue ink indicates the post-hoc p values.](#)

| Parameter                                                              | Other Strokes<br>N = 157 (55.5%)   | Large Vessel Occlusion<br>N = 126 (44.5%) | P-value |
|------------------------------------------------------------------------|------------------------------------|-------------------------------------------|---------|
| Age; Mean (SD); Years                                                  | 68 ± 16.1                          | 65.7 ± 14.4                               | 0.22    |
| Age; Median [IQR]; Years                                               | 70 [58 – 79]                       | 66 [57 – 75]                              | 0.14    |
| Sex; Female; N (%)                                                     | 71 (45.2)                          | 46 (36.5)                                 | 0.14    |
| Intravenous Thrombolysis; N (%)                                        | 14 (8.9)                           | 28 (22.2) <sup>A (0.002)</sup>            | 0.002   |
| Mechanical Thrombectomy; N (%)                                         | 0 (0.0)                            | 24 (19.0)                                 | <0.001  |
| National Institutes of Health Stroke Scale (NIHSS) Score; Median [IQR] | 6.0 [3.0 – 12.0]                   | 15.0 [8.0 – 21.0]                         | <0.001  |
| Imaging Patterns                                                       |                                    |                                           |         |
| Embollic/Large Vessel athero-Thromboembolism; N (%)                    | 99 (73.3)                          | 99 (88.4) <sup>A (0.003)</sup>            | <0.001  |
| Lacune; N (%)                                                          | 12 (17.0) <sup>B (&lt;0.001)</sup> | 2 (1.8)                                   |         |
| Border-zone; N (%)                                                     | 12 (8.9)                           | 11 (9.8)                                  |         |
| Vasculitis Pattern; N (%)                                              | 1 (0.7)                            | 0 (0.0)                                   |         |
| TOAST                                                                  |                                    |                                           |         |
| Large-Artery Atherosclerosis; N (%)                                    | 8 (9.6)                            | 46 (58.2) <sup>A (&lt;0.001)</sup>        | <0.001  |
| Cardio-embolism; N (%)                                                 | 21 (25.3)                          | 24 (30.4)                                 |         |
| Small-Vessel Occlusion; N (%)                                          | 17 (20.5)                          | 0 (0.0)                                   |         |
| Stroke of Other Determined Etiology; N (%)                             | 9 (10.8) <sup>B (0.04)</sup>       | 2 (2.5)                                   |         |
| Stroke of Undetermined Etiology; N (%)                                 | 28 (33.7) <sup>B (&lt;0.001)</sup> | 7 (8.9)                                   |         |
| Interval Between Onset to Index Event; Median [IQR]; Days              | 3.0 [0.0 – 9.0]                    | 3.0 [0.0 – 8.0]                           | 0.55    |
| Mechanical Ventilation; N (%)                                          | 42 (26.8)                          | 36 (28.6)                                 | 0.73    |
| Disposition*                                                           |                                    |                                           |         |
| Discharged Home; N (%)                                                 | 66 (44.6)                          | 46 (37.7)                                 | 0.24    |
| In Hospital Mortality; N (%)                                           | 35 (23.6)                          | 40 (32.8)                                 |         |
| Still in Hospital/Subacute Care; N (%)                                 | 47 (31.8)                          | 36 (29.5)                                 |         |
| Length of Hospital Stay; Median (IQR); Days                            | 8.0 [5.0 – 17.0]                   | 6.0 [4.0 – 15.0]                          | 0.10    |
| Comorbidities                                                          |                                    |                                           |         |
| Hypertension; N (%)                                                    | 106 (68.4)                         | 79 (62.7)                                 | 0.32    |
| Diabetes Mellitus; N (%)                                               | 56 (35.9)                          | 45 (35.7)                                 | 0.98    |
| Ischemic Heart Disease; N (%)                                          | 27 (18.2)                          | 40 (33.6) <sup>A (0.004)</sup>            | <0.001  |

| Parameter                                                | Other Strokes<br>N = 157 (55.5%) | Large Vessel Occlusion<br>N = 126 (44.5%) | P-<br>value |
|----------------------------------------------------------|----------------------------------|-------------------------------------------|-------------|
| Atrial Fibrillation; N (%)                               | 19 (12.3)                        | 21 (16.7)                                 | 0.29        |
| Carotid Stenosis; N (%)                                  | 17 (11.5)                        | 18 (15.1)                                 | 0.38        |
| Chronic Kidney Disease; N (%)                            | 27 (17.4)                        | 14 (11.1)                                 | 0.14        |
| Cardiac Ejection Fraction <40%; N (%)                    | 12 (8.1)                         | 8.0 (6.7)                                 | 0.67        |
| Active Neoplasm; N (%)                                   | 8 (5.4)                          | 9 (7.6)                                   | 0.47        |
| Rheumatological Disease; N (%)                           | 2 (1.4)                          | 3 (2.5)                                   | 0.48        |
| Prior Stroke or Transient Ischemic Attack; N (%)         | 2 (1.4)                          | 2 (1.7)                                   | 0.83        |
| Smoking; N (%)                                           | 23 (14.8)                        | 24 (19)                                   | 0.35        |
| <b>Laboratory Findings</b>                               |                                  |                                           |             |
| White Blood Cell Count x10 <sup>9</sup> /L; Mean (SD)    | 9.8 ± 4.6                        | 10.0 ± 5.1                                | 0.69        |
| White Blood Cell Count x10 <sup>9</sup> /L; Median [IQR] | 8.6 [6.7 – 11.5]                 | 9.5 [6.8 – 11.1]                          | 0.64        |
| Neutrophil Count x10 <sup>9</sup> /L; Mean (SD)          | 7.6 ± 4.2                        | 7.8 ± 4.7                                 | 0.77        |
| Neutrophil Count x10 <sup>9</sup> /L; Median [IQR]       | 6.5 [4.9 – 9.4]                  | 7.3 [4.7 – 9.1]                           | 0.94        |
| Lymphocyte Count x10 <sup>9</sup> /L; Mean (SD)          | 1.7 ± 1.2                        | 1.7 ± 2.2                                 | 0.82        |
| Lymphocyte x10 <sup>9</sup> /L; Median [IQR]             | 1.4 [1 – 2.1]                    | 1.3 [0.9 – 1.9]                           | 0.24        |
| Platelet Count x10 <sup>9</sup> /L; Mean (SD)            | 334.1 ± 563.6                    | 297.8 ± 332.4                             | 0.54        |
| Platelet Count x10 <sup>9</sup> /L; Median [IQR]         | 206.0 [150.0 – 307.5]            | 249.0 [165.0 – 340.0]                     | 0.90        |
| Alanine Transaminase (ALT); Mean (SD); U/L               | 55.5 ± 78.6                      | 62.9 ± 66.5                               | 0.43        |
| Alanine Transaminase (ALT); Median [IQR]; U/L            | 20.0 [6.1 – 75.0]                | 36.0 [13.1 – 109.0]                       | 0.05        |
| Aspartate Transaminase (AST); Mean (SD); U/L             | 31.6 ± 24.0                      | 31.5 ± 28.1                               | 0.98        |
| Aspartate Transaminase (AST); Median [IQR]; U/L          | 25.5 [14.0 – 43.5]               | 22.0 [14.0 – 36.0]                        | 0.42        |
| Blood Urea Nitrogen (BUN); Mean (SD); mg/dl              | 56.6 ± 141.5                     | 46.6 ± 55.9                               | 0.49        |
| Blood Urea Nitrogen (BUN); Median [IQR]; mg/dl           | 32.0 [22.0 – 46.0]               | 32.5 [21.0 – 50.0]                        | 0.91        |
| Creatinine; Mean (SD); mg/dl                             | 1.5 ± 1.4                        | 1.3 ± 0.9                                 | 0.27        |
| Creatinine; Median [IQR]; mg/dl                          | 1.0 [0.9 – 1.5]                  | 1.1 [0.9 – 1.4]                           | 0.69        |
| C-Reactive Protein (CRP); Mean (SD); mg/L                | 71.3 ± 183.8                     | 47.4 ± 54.8                               | 0.17        |
| C-Reactive Protein (CRP); Median [IQR]; mg/L             | 35.0 [25.0 – 61.0]               | 36.0 [24.0 – 50.0]                        | 0.33        |
| Lactate Dehydrogenase (LDH); Mean (SD); U/L              | 470.9 ± 801.3                    | 824.1 ± 2308.0                            | 0.26        |
| Lactate Dehydrogenase (LDH); Median [IQR]; U/L           | 347.0 [237.0 – 457.0]            | 418.0 [241.0 – 588.0]                     | 0.13        |
| Fibrinogen; Mean (SD); mg/dl                             | 346.3 ± 540.8                    | 612.9 ± 1468.5                            | 0.33        |
| Fibrinogen; Median [IQR]; mg/dl                          | 89.5 [3.8 – 457.0]               | 219.5 [ 3.3 – 483.0]                      | 0.68        |
| D- Dimer; Mean (SD); ng/ml                               | 2825.8 ± 7596.3                  | 1909.8 ± 2877.1                           | 0.43        |
| D- Dimer; Median [IQR]; ng/ml                            | 982.0 [592.5 – 2012.5]           | 935.0 [510.0 – 2180.0]                    | 0.92        |

\* Data on patients' disposition were sparse.

## Results; Supplemental Table 9. Subgroups of patients according to the imaging patterns.

Baseline characteristics, comorbidities, and laboratory findings among SARS-CoV-2 patients with a stroke, based on the neuroimaging pattern found when evaluating the patient. Blue ink indicates the post-hoc p values.

| Parameter                                                              | Embolic/Large Vessel Athero-Thromboembolism<br>N = 206 (80.5%) | Lacune<br>N = 26 (10.2%)        | Border-zone<br>N = 23<br>(9.0%)                    | Vasculitis Pattern<br>N = 1 (0.4%) | P-value |
|------------------------------------------------------------------------|----------------------------------------------------------------|---------------------------------|----------------------------------------------------|------------------------------------|---------|
| Age; Mean (SD); Year                                                   | 67 ± 15                                                        | 72 ± 18                         | 62 ± 18                                            | 57 ± 0                             | 0.17    |
| Age; Median [IQR]; Year                                                | 68 [58 – 78]                                                   | 73 [62 – 88]                    | 59 [49 – 77]                                       | 57 [57 – 57]                       | 0.41    |
| Sex; Female; N (%)                                                     | 83 (40.3)                                                      | 11 (42.3)                       | 7 (30.4)                                           | 1 (100.0)                          | 0.49    |
| Large Vessel Occlusion; N (%)                                          | 99 (50.0) <sup>A</sup> (<0.001)                                | 23 (92.0)                       | 12 (52.2) <sup>C</sup> (0.01)                      | 1 (100.0)                          | 0.001   |
| Intravenous Thrombolysis; N (%)                                        | 34 (16.5)                                                      | 1 (3.8)                         | 2 (8.7)                                            | 0 (0.0)                            | 0.28    |
| Mechanical Thrombectomy; N (%)                                         | 23 (11.2)                                                      | 0 (0.0)                         | 1 (4.3)                                            | 0 (0.0)                            | 0.24    |
| National Institutes of Health Stroke Scale (NIHSS) Score; Median [IQR] | 11.0 [5.0 – 19.0]                                              | 5.0 [2.0 – 8.0]                 | 14.0 [6.0 – 17.0]                                  | 0.0 [0.0 – 0.0]                    | 0.03    |
| TOAST Criteria                                                         |                                                                |                                 |                                                    |                                    |         |
| Large-Artery Atherosclerosis; N (%)                                    | 54 (37.5)                                                      | 0 (0.0)                         | 2 (33.3)                                           | 0 (0.0)                            | <0.001  |
| Cardio-embolism; N (%)                                                 | 43 (29.9)                                                      | 1 (5.3)                         | 1 (16.7)                                           | 1 (100.0)                          |         |
| Small-Vessel Occlusion; N (%)                                          | 4 (2.8)                                                        | 13 (68.4) <sup>A</sup> (<0.001) | 0 (0.0)                                            | 0 (0.0)                            |         |
| Stroke of Other Determined Etiology; N (%)                             | 9 (6.3)                                                        | 1 (5.3)                         | 3 (50.0) <sup>A</sup> (<0.001) <sup>B</sup> (0.03) | 0 (0.0)                            |         |
| Stroke of Undetermined Etiology; N (%)                                 | 34 (23.6)                                                      | 4 (21.1)                        | 0 (0.0)                                            | 0 (0.0)                            |         |
| Interval Between Onset to Index Event; Median [IQR]; Day               | 3.0 [0.0 – 10.0]                                               | 1.0 [0.0 – 6.0]                 | 5.0 [1.0 – 7.0]                                    | 23.0 [23.0 – 23.0]                 | 0.39    |
| Mechanical Ventilation; N (%)                                          | 63 (30.6)                                                      | 8 (30.8)                        | 6 (26.1)                                           | 0 (0.0)                            | 0.89    |
| Disposition*                                                           |                                                                |                                 |                                                    |                                    |         |
| Discharged Home; N (%)                                                 | 79 (38.5)                                                      | 14 (53.8)                       | 10 (43.5)                                          | 1 (100.0)                          | 0.44    |
| In Hospital Mortality; N (%)                                           | 62 (30.2)                                                      | 3 (11.5)                        | 6 (26.1)                                           | 0 (0.0)                            |         |
| Still in Hospital/Subacute Care; N (%)                                 | 64 (31.2)                                                      | 9 (34.6)                        | 7 (30.4)                                           | 0 (0.0)                            |         |
| Length of Hospital Stay; Median (IQR); Day                             | 7.0 [5.0 – 16.0]                                               | 6.0 [4.0 – 14.0]                | 15.0 [5.0 – 16.0]                                  | 37.0 [37.0 – 37.0]                 | 0.52    |
| Comorbidities                                                          |                                                                |                                 |                                                    |                                    |         |
| Hypertension; N (%)                                                    | 130 (63.4)                                                     | 16 (61.5)                       | 18 (78.3)                                          | 1 (100.0)                          | 0.45    |
| Diabetes Mellitus; N (%)                                               | 66 (32.2)                                                      | 8 (30.8)                        | 10 (43.5)                                          | 1 (100.0)                          | 0.35    |
| Ischemic Heart Disease; N (%)                                          | 56 (27.3)                                                      | 6 (23.1)                        | 3 (13.0)                                           | 0 (0.0)                            | 0.45    |

| Parameter                                                 | Embolic/Large Vessel Athero-Thromboembolism<br>N = 206 (80.5%) | Lacune<br>N = 26 (10.2%) | Border-zone<br>N = 23 (9.0%)    | Vasculitis Pattern<br>N = 1 (0.4%) | P-value |
|-----------------------------------------------------------|----------------------------------------------------------------|--------------------------|---------------------------------|------------------------------------|---------|
| Atrial Fibrillation; N (%)                                | 34 (16.6)                                                      | 4 (15.4)                 | 2 (8.7)                         | 1 (100.0)                          | 0.10    |
| Carotid Stenosis; N (%)                                   | 33 (16.1)                                                      | 1 (3.8)                  | 2 (8.7)                         | 0 (0.0)                            | 0.30    |
| Chronic Kidney Disease; N (%)                             | 25 (12.2)                                                      | 5 (19.2)                 | 8 (34.8) <sup>A</sup><br>(0.01) | 1 (100.0)                          | 0.003   |
| Cardiac Ejection Fraction <40%; N (%)                     | 16 (7.8)                                                       | 2 (7.7)                  | 1 (4.3)                         | 1 (100.0)                          | 0.61    |
| Active Neoplasm; N (%)                                    | 16 (7.8)                                                       | 2 (7.7)                  | 0 (0.0)                         | 0 (0.0)                            | 0.57    |
| Rheumatological Disease; N (%)                            | 4 (2.0)                                                        | 1 (3.8)                  | 0 (0.0)                         | 0 (0.0)                            | 0.81    |
| Prior Stroke or Transient Ischemic Attack; N (%)          | 2 (1.0)                                                        | 0 (0.0)                  | 1 (4.3)                         | 0 (0.0)                            | 0.50    |
| Smoking; N (%)                                            | 33 (16.1)                                                      | 2 (7.7)                  | 5 (21.7)                        | 0 (0.0)                            | 0.55    |
| Laboratory Findings                                       |                                                                |                          |                                 |                                    |         |
| White Blood Cell Count; Mean (SD); x10 <sup>9</sup> /L    | 10.2 ± 5.2                                                     | 9.5 ± 2.6                | 9.4 ± 3.4                       | 7.1 ± 0.0                          | 0.79    |
| White Blood Cell Count; Median [IQR]; x10 <sup>9</sup> /L | 9.1 [6.7 – 11.8]                                               | 8.8 [7.6 – 11.0]         | 9.8 [7.0 – 11.6]                | 7.1 [7.1 – 7.1]                    | 0.40    |
| Neutrophil Count; Mean (SD); x10 <sup>9</sup> /L          | 7.9 ± 4.8                                                      | 7.6 ± 2.5                | 7.7 ± 3.2                       | 5.3 ± 0.0                          | 0.94    |
| Neutrophil Count; Median [IQR]; x10 <sup>9</sup> /L       | 7.0 [4.7 – 9.3]                                                | 7.1 [5.9 – 8.8]          | 8.0 [5.2 – 9.1]                 | 5.3 [5.3 – 5.3]                    | 0.18    |
| Lymphocyte Count; Mean (SD); x10 <sup>9</sup> /L          | 1.6 ± 1.3                                                      | 1.7 ± 1.1                | 1.3 ± 0.5                       | 1.0 ± 0.0                          | 0.60    |
| Lymphocyte; Median [IQR]; x10 <sup>9</sup> /L             | 1.4 [0.9 – 1.9]                                                | 1.3 [1.0 – 2.0]          | 1.2 [0.9 – 1.6]                 | 1.0 [1.0 – 1.0]                    | 0.65    |
| Platelet Count; Mean (SD); x10 <sup>9</sup> /L            | 332.7 ± 520.1                                                  | 283.1 ± 374.6            | 256.1 ± 176.7                   | 268.0 ± 0.0                        | 0.92    |
| Platelet Count; Median [IQR]; x10 <sup>9</sup> /L         | 227.0 [163.0 – 328.0]                                          | 190.0 [145.0 – 261.0]    | 184.0 [135.0 – 338.0]           | 268.0 [268.0 – 268.0]              | 0.53    |
| Alanine Transaminase (ALT); Mean (SD); U/L                | 55.2 ± 68.6                                                    | 60.2 ± 68.3              | 67.4 ± 60.5                     | 156.0 ± 0.0                        | 0.45    |
| Alanine Transaminase (ALT); Median [IQR]; U/L             | 23.0 [7.0 – 85.0]                                              | 45.5 [18.7 – 65.0]       | 43.7 [15.0 – 110.0]             | 156.0 [156.0 – 156.0]              | 0.06    |
| Aspartate Transaminase (AST); Mean (SD); U/L              | 33.1 ± 28.6                                                    | 22.2 ± 12.4              | 27.4 ± 24.8                     | 77.0 ± 0.0                         | 1.00    |
| Aspartate Transaminase (AST); Median [IQR]; U/L           | 24.4 [13.0 – 44.0]                                             | 19.0 [12.4 – 35.0]       | 17.8 [13.0 – 37.5]              | 77.0 [77.0 – 77.0]                 | 0.28    |
| Blood Urea Nitrogen (BUN); Mean (SD); mg/dl               | 52.8 ± 120.1                                                   | 41.3 ± 46.4              | 54.7 ± 57.5                     | 13.0 ± 0.0                         | 0.96    |
| Blood Urea Nitrogen (BUN); Median [IQR]; mg/dl            | 33.0 [21.0 – 51.0]                                             | 29.0 [18.0 – 38.0]       | 35.5 [20.7 – 65.5]              | 13.0 [13.0 – 13.0]                 | 0.70    |
| Creatinine; Mean (SD); mg/dl                              | 1.4 ± 1.1                                                      | 1.5 ± 1.4                | 1.4 ± 0.9                       | 2.4 ± 0.0                          | 0.71    |
| Creatinine; Median [IQR]; mg/dl                           | 1.0 [0.8 – 1.4]                                                | 1.2 [0.9 – 1.5]          | 1.0 [0.9 – 1.9]                 | 2.4 [2.4 – 2.4]                    | 0.30    |
| C-Reactive Protein (CRP); Mean (SD); mg/L                 | 59.0 ± 148.0                                                   | 40.0 ± 26.0              | 91.0 ± 133.0                    | 20.0 ± 0.0                         | 0.78    |

| Parameter                                      | Embolic/Large Vessel Athero-Thromboembolism<br>N = 206 (80.5%) | Lacune<br>N = 26 (10.2%) | Border-zone<br>N = 23 (9.0%) | Vasculitis Pattern<br>N = 1 (0.4%) | P-value |
|------------------------------------------------|----------------------------------------------------------------|--------------------------|------------------------------|------------------------------------|---------|
| C-Reactive Protein (CRP); Median [IQR]; mg/L   | 36.0 [25.0 – 51.0]                                             | 30.0 [25.0 – 46.0]       | 48.0 [24.0 – 87.0]           | 20.0 [20.0 – 20.0]                 | 0.62    |
| Lactate Dehydrogenase (LDH); Mean (SD); U/L    | 679.4 ± 1885.7                                                 | 345.2 ± 205.6            | 590.5 ± 335.5                | 312.0 ± 0.0                        | 0.95    |
| Lactate Dehydrogenase (LDH); Median [IQR]; U/L | 349.5 [222.0 – 490.0]                                          | 367.0 [201.0 – 561.0]    | 581.5 [341.5 – 839.5]        | 312.0 [312.0 – 312.0]              | 0.57    |
| Fibrinogen; Mean (SD); mg/dl                   | 511.5 ± 1213.3                                                 | 217.4 ± 199.6            | 114.5 ± 223.6                | NA                                 | 0.71    |
| Fibrinogen; Median [IQR]; mg/dl                | 154.7 [3.8 – 450.0]                                            | 120.0 [104 – 403.0]      | 2.8 [2.6 – 226.5]            | NA                                 | 0.54    |
| D- Dimer; Mean (SD); ng/ml                     | 1488.5 ± 1919.1                                                | 951.9 ± 701.9            | 1558.3 ± 1682.0              | 955.0 ± 0.0                        | 0.89    |
| D- Dimer; Median [IQR]; ng/ml                  | 1000.0 [510.0 – 2100.0]                                        | 781.0 [480.0 – 1850.0]   | 625.0 [550.0 – 3500.0]       | 955.0 [955.0 – 955.0]              | 0.42    |

\* Data on patients' disposition were sparse.



**Results; Supplemental Table 10. Subgroups of AIS patients with stroke as the chief complaints versus others.**

Baseline characteristics, comorbidities, and laboratory findings among SARS-CoV-2 patients with a stroke, based on stroke as the chief complaint versus the presence of stroke following COVID-19 symptoms. [Blue ink indicates the post-hoc p values.](#)

| Parameter                                                              | Stroke as Chief Complaint<br>N = 104 (36.1%) | Stroke Following COVID-19 Symptoms<br>N = 184 (63.9%) | P-value |
|------------------------------------------------------------------------|----------------------------------------------|-------------------------------------------------------|---------|
| Age; Mean (SD); Years                                                  | 69 ± 15                                      | 66 ± 16                                               | 0.17    |
| Age; Median [IQR]; Years                                               | 70 [60 – 79]                                 | 67 [56 - 78]                                          | 0.20    |
| Sex; Female; N (%)                                                     | 49 (47.1)                                    | 67 (36.4)                                             | 0.08    |
| Large Vessel Occlusion; N (%)                                          | 43 (46.2)                                    | 75 (43.1)                                             | 0.62    |
| Intravenous Thrombolysis; N (%)                                        | 18 (17.3)                                    | 24 (13.0)                                             | 0.33    |
| Mechanical Thrombectomy; N (%)                                         | 8 (7.7)                                      | 14 (7.6)                                              | 0.98    |
| National Institutes of Health Stroke Scale (NIHSS) Score; Median [IQR] | 10.0 [3.0 – 20.0]                            | 9.0 [5.0 – 16.0]                                      | 0.94    |
| Imaging Patterns                                                       |                                              |                                                       |         |
| Embollic/Large Vessel athero-Thromboembolism; N (%)                    | 67 (79.8)                                    | 132 (81.0)                                            | 0.23    |
| Lacune; N (%)                                                          | 12 (14.3)                                    | 13 (8.0)                                              |         |
| Border-zone; N (%)                                                     | 5 (6.0)                                      | 17 (10.4)                                             |         |
| Vasculitis Pattern; N (%)                                              | 0 (0.0)                                      | 1 (0.6)                                               |         |
| TOAST                                                                  |                                              |                                                       |         |
| Large-Artery Atherosclerosis; N (%)                                    | 13 (25.5)                                    | 43 (38.7)                                             | 0.21    |
| Cardio-embolism; N (%)                                                 | 17 (33.3)                                    | 28 (25.2)                                             |         |
| Small-Vessel Occlusion; N (%)                                          | 8 (15.7)                                     | 9 (8.1)                                               |         |
| Stroke of Other Determined Etiology; N (%)                             | 2 (3.9)                                      | 10 (9.0)                                              |         |
| Stroke of Undetermined Etiology; N (%)                                 | 11 (21.6)                                    | 21 (18.9)                                             |         |
| Mechanical Ventilation; N (%)                                          | 28 (26.9)                                    | 54 (29.3)                                             | 0.66    |
| Disposition*                                                           |                                              |                                                       |         |
| Discharged Home; N (%)                                                 | 36 (37.9)                                    | 72 (42.4)                                             | 0.02    |
| In Hospital Mortality; N (%)                                           | 37 (38.9) <sup>B (0.006)</sup>               | 39 (22.9)                                             |         |
| Still in Hospital/Subacute Care; N (%)                                 | 22 (23.2)                                    | 59 (34.7)                                             |         |
| Length of Hospital Stay; Median (IQR); Days                            | 6.0 [4.0 – 12.0]                             | 9.0 [5.0 – 17.0]                                      |         |
| Comorbidities                                                          |                                              |                                                       |         |
| Hypertension; N (%)                                                    | 69 (67.6)                                    | 122 (66.3)                                            | 0.82    |
| Diabetes Mellitus; N (%)                                               | 35 (34.0)                                    | 67 (36.4)                                             | 0.68    |
| Ischemic Heart Disease; N (%)                                          | 23 (25.3)                                    | 45 (26.0)                                             | 0.90    |

| Parameter                                                | Stroke as Chief Complaint<br>N = 104 (36.1%) | Stroke Following COVID-19 Symptoms<br>N = 184 (63.9%) | P-value |
|----------------------------------------------------------|----------------------------------------------|-------------------------------------------------------|---------|
| Atrial Fibrillation; N (%)                               | 19 (18.6)                                    | 22 (12.0)                                             | 0.12    |
| Carotid Stenosis; N (%)                                  | 10 (11.0)                                    | 28 (16.2)                                             | 0.25    |
| Chronic Kidney Disease; N (%)                            | 13 (12.7)                                    | 28 (15.2)                                             | 0.57    |
| Cardiac Ejection Fraction <40%; N (%)                    | 10 (11.0)                                    | 10 (5.8)                                              | 0.13    |
| Active Neoplasm; N (%)                                   | 5 (5.5)                                      | 13 (7.5)                                              | 0.54    |
| Rheumatological Disease; N (%)                           | 2 (2.2)                                      | 3 (1.7)                                               | 0.80    |
| Prior Stroke or Transient Ischemic Attack; N (%)         | 1 (1.1)                                      | 2 (1.2)                                               | 0.97    |
| Smoking; N (%)                                           | 15 (14.7)                                    | 31 (16.8)                                             | 0.64    |
| <b>Laboratory Findings</b>                               |                                              |                                                       |         |
| White Blood Cell Count x10 <sup>9</sup> /L; Mean (SD)    | 10.2 ± 5.4                                   | 9.8 ± 4.5                                             | 0.54    |
| White Blood Cell Count x10 <sup>9</sup> /L; Median [IQR] | 8.9 [6.7 – 12.1]                             | 9.0 [7.2 – 11.1]                                      | 0.94    |
| Neutrophil Count x10 <sup>9</sup> /L; Mean (SD)          | 7.7 ± 4.8                                    | 7.9 ± 4.2                                             | 0.75    |
| Neutrophil Count x10 <sup>9</sup> /L; Median [IQR]       | 6.4 [4.4 – 9.7]                              | 7.2 [5.1 – 9.2]                                       | 0.39    |
| Lymphocyte Count x10 <sup>9</sup> /L; Mean (SD)          | 1.7 ± 1.7                                    | 1.7 ± 1.7                                             | 0.90    |
| Lymphocyte x10 <sup>9</sup> /L; Median [IQR]             | 1.4 [0.9 – 1.9]                              | 1.3 [0.9 – 1.9]                                       | 0.81    |
| Platelet Count x10 <sup>9</sup> /L; Mean (SD)            | 263.4 ± 201.5                                | 343.4 ± 557.7                                         | 0.10    |
| Platelet Count x10 <sup>9</sup> /L; Median [IQR]         | 224.0 [168.0 – 313.0]                        | 222.0 [150.0 – 335.0]                                 | 0.93    |
| Alanine Transaminase (ALT); Mean (SD); U/L               | 54.3 ± 92.7                                  | 65.3 ± 81.9                                           | 0.34    |
| Alanine Transaminase (ALT); Median [IQR]; U/L            | 20.0 [7.0 – 75.0]                            | 32.3 [10.0 – 99.0]                                    | 0.11    |
| Aspartate Transaminase (AST); Mean (SD); U/L             | 32.9 ± 27.1                                  | 33.9 ± 27.8                                           | 0.78    |
| Aspartate Transaminase (AST); Median [IQR]; U/L          | 24.6 [15.0 – 42.0]                           | 25.0 [14.0 – 44.2]                                    | 0.96    |
| Blood Urea Nitrogen (BUN); Mean (SD); mg/dl              | 58.1 ± 167.5                                 | 50.1 ± 53.0                                           | 0.58    |
| Blood Urea Nitrogen (BUN); Median [IQR]; mg/dl           | 27.5 [19.0 – 46.5]                           | 33.0 [23.0 – 55.0]                                    | 0.05    |
| Creatinine; Mean (SD); mg/dl                             | 1.4 ± 1.1                                    | 1.5 ± 1.2                                             | 0.88    |
| Creatinine; Median [IQR]; mg/dl                          | 1.1 [0.9 – 1.5]                              | 1.1 [0.9 – 1.5]                                       | 0.71    |
| C-Reactive Protein (CRP); Mean (SD); mg/L                | 65.0 ± 210.0                                 | 56.0 ± 62.0                                           | 0.59    |
| C-Reactive Protein (CRP); Median [IQR]; mg/L             | 32.0 [24.0 – 46.0]                           | 38.0 [26.0 – 62.0]                                    | 0.07    |
| Lactate Dehydrogenase (LDH); Mean (SD); U/L              | 398.6 ± 223.1                                | 756.2 ± 2008.6                                        | 0.27    |
| Lactate Dehydrogenase (LDH); Median [IQR]; U/L           | 347.0 [216.0 – 507.0]                        | 407.0 [258.0 – 574.0]                                 | 0.31    |
| Fibrinogen; Mean (SD); mg/dl                             | 520.1 ± 650.6                                | 469.4 ± 1185.3                                        | 0.86    |
| Fibrinogen; Median [IQR]; mg/dl                          | 411.0 [53.9 – 594.0]                         | 178.0 [3.8 – 471.0]                                   | 0.20    |
| D- Dimer; Mean (SD); ng/ml                               | 2444.7 ± 7368.7                              | 2953.1 ± 6845.3                                       | 0.73    |
| D- Dimer; Median [IQR]; ng/ml                            | 691.0 [441.0 – 1100.0]                       | 1259.5 [585.0 – 2460.0]                               | 0.02    |

\* Data on patients' disposition were sparse.

# **Results**

## **Acute Ischemic Stroke**

### **Ecological Comparisons**

#### **Supplemental Tables 11-12**

### Results; Supplemental Table 11. Subgroups of AIS patients based on geographical regions

Baseline characteristics, comorbidities, and laboratory findings among SARS-CoV-2 patients with an acute ischemic stroke, according to geographical regions. **Blue ink indicates the post-hoc p values.**

| Parameter                                                              | A: Middle East<br>N = 153 (47.4%)  | B: Asia<br>N = 6 (1.9%)                              | C: America<br>N = 88 (27.2%) | D: Europe<br>N = 76 (23.5%)                                | P-value |
|------------------------------------------------------------------------|------------------------------------|------------------------------------------------------|------------------------------|------------------------------------------------------------|---------|
| Age; Mean (SD); Years                                                  | 67 ± 15                            | 54 ± 20                                              | 68 ± 14                      | 68 ± 16                                                    | 0.19    |
| Age; Median [IQR]; Years                                               | 68 [58 – 78]                       | 48 [39 – 75]                                         | 66 [59 – 79]                 | 70 [58 – 80]                                               | 0.39    |
| Sex; Female; N (%)                                                     | 58 (37.9)                          | 1 (16.7)                                             | 38 (43.2)                    | 33 (43.4)                                                  | 0.50    |
| Large Vessel Occlusion; N (%)                                          | 71 (48.3)                          | 2 (40.0)                                             | 23 (41.1)                    | 30 (40.0)                                                  | 0.62    |
| Intravenous Thrombolysis; N (%)                                        | 22 (14.4)                          | 1 (16.7)                                             | 11 (12.5)                    | 10 (13.2)                                                  | 0.97    |
| Mechanical Thrombectomy; N (%)                                         | 4 (2.6)                            | 0 (0.0)                                              | 4 (4.5)                      | 16 (21.1) <sup>A (&lt;0.001)</sup><br><sub>C (0.004)</sub> | <0.001  |
| National Institutes of Health Stroke Scale (NIHSS) Score; Median [IQR] | 12.0 [6.0 – 17.0]                  | 7.0 [5.0 – 11.0]                                     | 7.0 [0.0 – 16.0]             | 8.0 [4.0 – 18.0]                                           | 0.06    |
| Imaging Patterns                                                       |                                    |                                                      |                              |                                                            |         |
| Embolic/Large Vessel athero-Thromboembolism; N (%)                     | 107 (75.4)                         | 5 (83.3)                                             | 29 (87.9)                    | 65 (86.7)                                                  | 0.05    |
| Lacune; N (%)                                                          | 16 (11.3)                          | 0 (0.0)                                              | 3 (9.1)                      | 7 (9.3)                                                    |         |
| Border-zone; N (%)                                                     | 19 (13.4)                          | 1 (16.7)                                             | 0 (0.0)                      | 3 (4.0)                                                    |         |
| Vasculitis Pattern; N (%)                                              | 0 (0.0)                            | 0 (0.0)                                              | 1 (3.0)                      | 0 (0.0)                                                    |         |
| TOAST                                                                  |                                    |                                                      |                              |                                                            |         |
| Large-Artery Atherosclerosis; N (%)                                    | 38 (53.5) <sup>D (&lt;0.001)</sup> | 2 (33.3)                                             | 5 (26.3)                     | 11 (14.9)                                                  | <0.001  |
| Cardio-embolism; N (%)                                                 | 15 (21.1)                          | 1 (16.7)                                             | 3 (15.8)                     | 27 (36.5)                                                  |         |
| Small-Vessel Occlusion; N (%)                                          | 12 (18.3) <sup>D (0.02)</sup>      | 0 (0.0)                                              | 1 (5.3)                      | 3 (4.1)                                                    |         |
| Stroke of Other Determined Etiology; N (%)                             | 5 (7.0)                            | 0 (0.0)                                              | 2 (10.5)                     | 6 (8.1)                                                    |         |
| Stroke of Undetermined Etiology; N (%)                                 | 0 (0.0)                            | 3 (50.0)                                             | 8 (42.1)                     | 27 (36.5)                                                  |         |
| Interval Between Onset to Index Event; Median [IQR]; Days              | 3.0 [0.0 – 8.0]                    | 5.0 [4.0 – 6.0]                                      | 2.0 [0.0 – 7.0]              | 4.0 [0.0 – 14.0]                                           | 0.14    |
| Mechanical Ventilation; N (%)                                          | 47 (30.7)                          | 1 (16.7)                                             | 15 (17.0)                    | 22 (28.9)                                                  | 0.11    |
| Disposition*                                                           |                                    |                                                      |                              |                                                            |         |
| Discharged Home; N (%)                                                 | 74 (48.4)                          | 0.0 (0.0)                                            | 28 (45.2)                    | 25 (32.9)                                                  | <0.001  |
| In Hospital Mortality; N (%)                                           | 46 (30.1)                          | 1 (16.7)                                             | 16 (25.8)                    | 19 (25.0)                                                  |         |
| Still in Hospital/Subacute Care; N (%)                                 | 33 (21.6)                          | 5 (83.3) <sup>A (0.003)</sup><br><sub>C (0.04)</sub> | 18 (29.0)                    | 32 (42.1) <sup>A (0.007)</sup>                             |         |

| Parameter                                                | A: Middle East<br>N = 153 (47.4%)          | B: Asia<br>N = 6 (1.9%) | C: America<br>N = 88 (27.2%) | D: Europe<br>N = 76 (23.5%) | P-value |
|----------------------------------------------------------|--------------------------------------------|-------------------------|------------------------------|-----------------------------|---------|
| Length of Hospital Stay; Median (IQR); Days              | 6.0 [4.0 – 10.0]<br>C (0.047)<br>D (0.047) | 12.0 [12.0 – 14.0]      | 9.0 [4.0 – 14.0]             | 11.0 [5.0 – 18.0]           | 0.04    |
| Comorbidities                                            |                                            |                         |                              |                             |         |
| Hypertension; N (%)                                      | 93 (60.8)                                  | 2 (33.3)                | 56 (65.9)                    | 51 (67.1)                   | 0.33    |
| Diabetes Mellitus; N (%)                                 | 53 (34.6)                                  | 1 (16.7)                | 34 (39.5)                    | 23 (30.3)                   | 0.50    |
| Ischemic Heart Disease; N (%)                            | 50 (32.7) <sup>C (0.02)</sup><br>D (0.04)  | 0 (0.0)                 | 9 (14.8)                     | 13 (17.1)                   | 0.01    |
| Atrial Fibrillation; N (%)                               | 20 (13.1)                                  | 0 (0.0)                 | 9 (10.6)                     | 16 (21.1)                   | 0.17    |
| Carotid Stenosis; N (%)                                  | 17 (11.1)                                  | 0 (0.0)                 | 7 (11.5)                     | 14 (18.4)                   | 0.32    |
| Chronic Kidney Disease; N (%)                            | 30 (19.6) <sup>C (0.01)</sup>              | 0 (0.0)                 | 5 (5.9)                      | 7 (9.2)                     | 0.01    |
| Cardiac Ejection Fraction <40%; N (%)                    | 6 (3.9)                                    | 1 (16.7)                | 7 (11.5)                     | 10 (13.2)                   | 0.05    |
| Active Neoplasm; N (%)                                   | 12 (7.8)                                   | 0 (0.0)                 | 5 (8.2)                      | 4 (5.3)                     | 0.78    |
| Rheumatological Disease; N (%)                           | 0 (0.0)                                    | 0 (0.0)                 | 0 (0.0)                      | 5 (6.6)                     | <0.001  |
| Prior Stroke or Transient Ischemic Attack; N (%)         | 2 (1.3)                                    | 0 (0.0)                 | 2 (3.3)                      | 1 (1.3)                     | 0.75    |
| Smoking; N (%)                                           | 28 (18.3)                                  | 0 (0.0)                 | 16 (8.8)                     | 9 (11.8)                    | 0.38    |
| Laboratory Findings                                      |                                            |                         |                              |                             |         |
| White Blood Cell Count x10 <sup>9</sup> /L; Mean (SD)    | 10.3 ± 4.5                                 | 7.2 ± 3.2               | 9.0 ± 4.1                    | 10.1 ± 5.9                  | 0.15    |
| White Blood Cell Count x10 <sup>9</sup> /L; Median [IQR] | 9.6 [7.5 – 11.8]                           | 6.3 [4.4 – 10.2]        | 7.9 [6.2 – 10.5]             | 8.5 [6.2 – 11.5]            | 0.02    |
| Neutrophil Count x10 <sup>9</sup> /L; Mean (SD)          | 8.2 ± 4.3                                  | 4.4 ± 2.6               | 7.2 ± 4.2                    | 7.6 ± 5.0                   | 0.11    |
| Neutrophil Count x10 <sup>9</sup> /L; Median [IQR]       | 7.6 [5.4 – 9.9]                            | 3.7 [2.5 – 5.3]         | 6.3 [4.2 – 8.2]              | 6.0 [4.2 – 8.8]             | 0.01    |
| Lymphocyte Count x10 <sup>9</sup> /L; Mean (SD)          | 1.5 ± 1.0                                  | 1.7 ± 0.5               | 1.6 ± 2.1                    | 2.2 ± 2.2                   | 0.05    |
| Lymphocyte x10 <sup>9</sup> /L; Median [IQR]             | 1.3 [0.9 – 1.9]                            | 1.6 [1.4 – 1.7]         | 1.2 [0.9 – 1.8]              | 1.4 [0.9 – 2.5]             | 0.14    |
| Platelet Count x10 <sup>9</sup> /L; Mean (SD)            | 230.5 ± 112.5<br>D (<0.001)                | 200.5 ± 86.8            | 295.6 ± 138.3<br>D (0.017)   | 506.0 ± 835.8               | <0.001  |
| Platelet Count x10 <sup>9</sup> /L; Median [IQR]         | 192.0 [145.0 – 305.0]<br>C (0.039)         | 181.5 [127.0 – 241.0]   | 268.0 [202.0 – 381.0]        | 244.5 [177.0 – 397.5]       | <0.001  |
| Alanine Transaminase (ALT); Mean (SD); U/L               | 59.7 ± 70.9                                | 60.6 ± 70.5             | 78.1 ± 109.9                 | 57.2 ± 91.3                 | 0.50    |
| Alanine Transaminase (ALT); Median [IQR] ; U/L           | 33.0 [9.0 – 97.0]                          | 26.0 [11.0 – 113.4]     | 42.3 [16.2 – 102.0]          | 20.5 [3.1 – 57.5]           | 0.21    |
| Aspartate Transaminase (AST); Mean (SD); U/L             | 34.1 ± 29.4                                | 23.7 ± 14.3             | 30.9 ± 21.0                  | 30.4 ± 27.5                 | 0.62    |
| Aspartate Transaminase (AST); Median [IQR] ; U/L         | 23.0 [14.6 – 43.0]                         | 23.5 [14.2 – 34.0]      | 23.5 [15.0 – 40.0]           | 25.6 [7.7 – 40.0]           | 0.70    |
| Blood Urea Nitrogen (BUN); Mean (SD); mg/dl              | 50.0 ± 49.0                                | 101.7 ± 118.7           | 79.6 ± 188.3                 | 38.9 ± 27.6                 | 0.05    |

| Parameter                                      | A: Middle East<br>N = 153 (47.4%)             | B: Asia<br>N = 6 (1.9%)            | C: America<br>N = 88 (27.2%) | D: Europe<br>N = 76 (23.5%) | P-value |
|------------------------------------------------|-----------------------------------------------|------------------------------------|------------------------------|-----------------------------|---------|
| Blood Urea Nitrogen (BUN); Median [IQR]; mg/dl | 30.0 [20.0 – 46.0]                            | 60.0 [35.0 – 86.0]                 | 35.0 [21.0 – 67.0]           | 33.0 [23.0 – 46.0]          | 0.14    |
| Creatinine; Mean (SD); mg/dl                   | 1.51 ± 1.3                                    | 1.4 ± 0.9                          | 1.9 ± 2.8                    | 1.1 ± 0.6                   | 0.04    |
| Creatinine; Median [IQR]; mg/dl                | 1.12 [0.9 – 1.5]                              | 1.0 [1.0 – 1.4]                    | 1.1 [0.8 – 2.3]              | 1.0 [0.8 – 1.3]             | 0.06    |
| C-Reactive Protein (CRP); Mean (SD); mg/L      | 50.0 ± 60.0                                   | 118.0 ± 138.0                      | 98.0 ± 239.0                 | 40.0 ± 24.0                 | 0.02    |
| C-Reactive Protein (CRP); Median [IQR]; mg/L   | 33.0 [24.0 – 49.0]                            | 72.0 [45.0 – 94.0]                 | 43.0 [24.0 – 82.0]           | 36.0 [24.0 – 50.0]          | 0.10    |
| Lactate Dehydrogenase (LDH); Mean (SD); U/L    | 462.4 ± 186.8                                 | 541.5 ± 185.8                      | 432.1 ± 278.6                | 911.6 ± 2623.2              | 0.40    |
| Lactate Dehydrogenase (LDH); Median [IQR]; U/L | 426.5 [331.5 – 558.5]<br>D (0.006)            | 504.0 [419.0 – 648.0]<br>D (0.008) | 384.0 [266.0 – 536.0]        | 270.0 [197.0 – 426.0]       | 0.03    |
| Fibrinogen; Mean (SD); mg/dl                   | 459.6 ± 759.0                                 | 43.5 ± 58.8                        | 421.9 ± 214.8                | 560.3 ± 1377.8              | 0.70    |
| Fibrinogen; Median [IQR]; mg/dl                | 166.8 [2.2 – 403.0]<br>C (0.043)<br>D (0.039) | 23.0 [3.5 – 53.9]<br>C (0.037)     | 464.0 [216.5 – 578.5]        | 210.0 [3.8 – 456.0]         | 0.01    |
| D- Dimer; Mean (SD); ng/ml                     | 1356.6 ± 3084.7                               | 560.0 ± 265.5                      | 4430.7 ± 9768.1              | 1659.8 ± 1167.4             | 0.09    |
| D- Dimer; Median [IQR]; ng/ml                  | 584.0 [427.0 – 1100.0]                        | 550.0 [400.0 – 650.0]              | 1060.0 [565.0 – 2867.0]      | 1431.0 [730.0 – 2200.0]     | 0.01    |

\* Data on patients' disposition were sparse.

## Results; Supplemental Table 12. Subgroups of AIS patients according to the countries' health expenditure

Baseline characteristics, comorbidities, and laboratory findings among SARS-CoV-2 patients with an acute ischemic stroke, based on the countries' health expenditures. **Blue ink indicates the post-hoc p values.**

| Parameter                                                              | Middle to high health expenditure<br>N = 170 (52.6%) | Low health expenditure<br>N = 153 (47.4%) | P-value |
|------------------------------------------------------------------------|------------------------------------------------------|-------------------------------------------|---------|
| Age; Mean (SD); Years                                                  | 68 ± 15                                              | 67 ± 15                                   | 0.65    |
| Age; Median [IQR]; Years                                               | 69 [58 – 79]                                         | 68 [58 – 77]                              | 0.83    |
| Sex; Female; N (%)                                                     | 74 (43.5)                                            | 56 (36.6)                                 | 0.21    |
| Large Vessel Occlusion; N (%)                                          | 53 (39.0)                                            | 73 (49.7)                                 | 0.07    |
| Intravenous Thrombolysis; N (%)                                        | 21 (12.4)                                            | 23 (15.0)                                 | 0.48    |
| Mechanical Thrombectomy; N (%)                                         | 21 (12.4)                                            | 3 (2.0)                                   | <0.001  |
| National Institutes of Health Stroke Scale (NIHSS) Score; Median [IQR] | 8.0 [3.0 – 17.0]                                     | 11.0 [5.0 – 17.0]                         | 0.02    |
| Imaging Patterns                                                       |                                                      |                                           |         |
| Embolitic/Large Vessel athero-Thromboembolism; N (%)                   | 100 (87.0) <sup>B (0.02)</sup>                       | 106 (75.2)                                | 0.02    |
| Lacune; N (%)                                                          | 10 (8.7)                                             | 16 (11.3)                                 |         |
| Border-zone; N (%)                                                     | 4 (3.5)                                              | 19 (13.5) <sup>A (0.01)</sup>             |         |
| Vasculitis Pattern; N (%)                                              | 1 (0.9)                                              | 0 (0.0)                                   |         |
| TOAST                                                                  |                                                      |                                           |         |
| Large-Artery Atherosclerosis; N (%)                                    | 19 (19.2)                                            | 37 (52.1) <sup>A (&lt;0.001)</sup>        | <0.001  |
| Cardio-embolism; N (%)                                                 | 31 (31.3)                                            | 15 (21.1)                                 |         |
| Small-Vessel Occlusion; N (%)                                          | 4 (4.0)                                              | 13 (18.3) <sup>A (0.002)</sup>            |         |
| Stroke of Other Determined Etiology; N (%)                             | 8 (8.1)                                              | 5 (7.0)                                   |         |
| Stroke of Undetermined Etiology; N (%)                                 | 37 (37.4) <sup>B (&lt;0.001)</sup>                   | 1 (1.4)                                   |         |
| Interval Between Onset to Index Event; Median [IQR]; Days              | 3.0 [0.0 – 10.0]                                     | 3.0 [0.0 – 8.0]                           | 0.69    |
| Mechanical Ventilation; N (%)                                          | 38 (22.4)                                            | 47 (30.7)                                 | 0.09    |
| Disposition*                                                           |                                                      |                                           |         |
| Discharged Home; N (%)                                                 | 54 (37.5)                                            | 73 (47.7)                                 | 0.01    |
| In Hospital Mortality; N (%)                                           | 35 (24.3)                                            | 47 (30.7)                                 |         |
| Still in Hospital/Subacute Care; N (%)                                 | 55 (38.2) <sup>B (0.002)</sup>                       | 33 (21.6)                                 |         |
| Length of Hospital Stay; Median (IQR); Days                            | 10.0 [5.0 – 17.0]                                    | 6.0 [4.0 – 10.0]                          | 0.14    |
| Comorbidities                                                          |                                                      |                                           |         |
| Hypertension; N (%)                                                    | 109 (65.3)                                           | 93 (60.8)                                 | 0.41    |
| Diabetes Mellitus; N (%)                                               | 59 (35.1)                                            | 52 (34.0)                                 | 0.83    |
| Ischemic Heart Disease; N (%)                                          | 22 (15.4)                                            | 50 (32.7)                                 | <0.001  |
| Atrial Fibrillation; N (%)                                             | 25 (15.0)                                            | 20 (13.1)                                 | 0.63    |

| Parameter                                                | Middle to high health expenditure<br>N = 170 (52.6%) | Low health expenditure<br>N = 153 (47.4%) | P-value |
|----------------------------------------------------------|------------------------------------------------------|-------------------------------------------|---------|
| Carotid Stenosis; N (%)                                  | 19 (13.3)                                            | 19 (12.4)                                 | 0.82    |
| Chronic Kidney Disease; N (%)                            | 11 (6.6)                                             | 21 (20.3)                                 | <0.001  |
| Cardiac Ejection Fraction <40%; N (%)                    | 18 (12.6)                                            | 6 (3.9)                                   | 0.01    |
| Active Neoplasm; N (%)                                   | 8 (5.6)                                              | 13 (8.5)                                  | 0.33    |
| Rheumatological Disease; N (%)                           | 4 (2.8)                                              | 1 (0.7)                                   | 0.15    |
| Prior Stroke or Transient Ischemic Attack; N (%)         | 3 (2.1)                                              | 2 (1.3)                                   | 0.60    |
| Smoking; N (%)                                           | 23 (13.8)                                            | 30 (19.6)                                 | 0.16    |
| Laboratory Findings                                      |                                                      |                                           |         |
| White Blood Cell Count x10 <sup>9</sup> /L; Mean (SD)    | 9.6 ± 5.0                                            | 10.1 ± 4.6                                | 0.30    |
| White Blood Cell Count x10 <sup>9</sup> /L; Median [IQR] | 8.2 [6.2 – 10.8]                                     | 9.5 [7.4 – 11.8]                          | 0.02    |
| Neutrophil Count x10 <sup>9</sup> /L; Mean (SD)          | 7.3 ± 4.6                                            | 8.2 ± 4.3                                 | 0.11    |
| Neutrophil Count x10 <sup>9</sup> /L; Median [IQR]       | 6.2 [4.2 – 8.7]                                      | 7.5 [5.3 -9.9]                            | <0.001  |
| Lymphocyte Count x10 <sup>9</sup> /L; Mean (SD)          | 1.9 ± 2.2                                            | 1.5 ± 1.0                                 | 0.09    |
| Lymphocyte x10 <sup>9</sup> /L; Median [IQR]             | 1.3 [0.9 – 2.0]                                      | 1.3 [1.0 – 1.9]                           | 1.00    |
| Platelet Count x10 <sup>9</sup> /L; Mean (SD)            | 393.4 ± 591.6                                        | 229.0 ± 110.6                             | <0.001  |
| Platelet Count x10 <sup>9</sup> /L; Median [IQR]         | 247.0 [183.0 – 386.0]                                | 191.0 [145.0 – 298.5]                     | <0.001  |
| Alanine Transaminase (ALT); Mean (SD); U/L               | 65.8 ± 99.9                                          | 60.9 ± 70.6                               | 0.65    |
| Alanine Transaminase (ALT); Median [IQR]; U/L            | 26.9 [8.6 – 76.5]                                    | 40.0 [10.4 – 98.0]                        | 0.46    |
| Aspartate Transaminase (AST); Mean (SD); U/L             | 31.3 ± 24.0                                          | 33.0 ± 29.6                               | 0.60    |
| Aspartate Transaminase (AST); Median [IQR]; U/L          | 27.0 [14.0 – 40.0]                                   | 21.4 [14.0 – 39.0]                        | 0.62    |
| Blood Urea Nitrogen (BUN); Mean (SD); mg/dl              | 61.4 ± 135.2                                         | 43.5 ± 47.9                               | 0.14    |
| Blood Urea Nitrogen (BUN); Median [IQR]; mg/dl           | 33.0 [22.0 – 53.0]                                   | 32.0 [20.0 – 46.0]                        | 0.35    |
| Creatinine; Mean (SD); mg/dl                             | 1.52 ± 2.0                                           | 1.5 ± 1.3                                 | 0.95    |
| Creatinine; Median [IQR]; mg/dl                          | 1.0 [0.8 – 1.4]                                      | 1.1 [0.9 – 1.5]                           | 0.07    |
| C-Reactive Protein (CRP); Mean (SD); mg/L                | 71.0 ± 170.0                                         | 50.0 ± 60.0                               | 0.18    |
| C-Reactive Protein (CRP); Median [IQR]; mg/L             | 39.0 [24.0 – 66.0]                                   | 33.0 [25.0 – 48.0]                        | 0.11    |
| Lactate Dehydrogenase (LDH); Mean (SD); U/L              | 667.0 ± 1861.5                                       | 473.8 ± 187.3                             | 0.50    |
| Lactate Dehydrogenase (LDH); Median [IQR]; U/L           | 346.0 [205.0 – 522.0]                                | 438.0 [336.0 – 600.0]                     | 0.01    |
| Fibrinogen; Mean (SD); mg/dl                             | 514.4 ± 1061.6                                       | 171.7 ± 216.9                             | 0.27    |
| Fibrinogen; Median [IQR]; mg/dl                          | 328.0 [53.9 – 506.0]                                 | 2.47 [2.1 – 373.0]                        | 0.02    |
| D- Dimer; Mean (SD); ng/ml                               | 2879.1 ± 6884.8                                      | 1522.9 ± 3156.3                           | 0.38    |
| D- Dimer; Median [IQR]; ng/ml                            | 1060.0 [585.0 – 2235.0]                              | 600.0 [462.0 – 1100.0]                    | 0.05    |

\* Data on patients' disposition were sparse.





# **Results**

**Structure of the Models: the proportion of the comorbidities under each subclass of the models**

**Supplemental Tables 13-18**

## Results; Supplemental Table 13. Dividing the SARS-CoV-2 infected acute ischemic stroke patients into 2 subgroups

The table shows the structure of the models for grouping the patients into 2 subgroups using machine learning (ML) and expert opinion (EX) models by considering the present comorbidities. ML-K<sub>2</sub> used hierarchal clustering and K-means, while ML-S<sub>2</sub> used spectral clustering, EX-A<sub>2</sub> used all 11 collected comorbidities and EX-S<sub>2</sub> used 8 selected comorbidities, to separate patients into 2 subgroups.

| Model                             | Machine Learning           |                         |         |                              |                         |         | Clinician Expert Opinion              |                         |         |                                            |                         |         |
|-----------------------------------|----------------------------|-------------------------|---------|------------------------------|-------------------------|---------|---------------------------------------|-------------------------|---------|--------------------------------------------|-------------------------|---------|
|                                   | ML-K <sub>2</sub> (K-Mean) |                         |         | ML-S <sub>2</sub> (Spectral) |                         |         | EX-A <sub>2</sub> (All Comorbidities) |                         |         | EX-S <sub>2</sub> (Selected Comorbidities) |                         |         |
| Comorbidities                     | A<br>N = 112<br>(38.4%)    | B<br>N = 180<br>(61.6%) | P-value | A<br>N = 173<br>(60.3%)      | B<br>N = 114<br>(39.7%) | P-value | A<br>N = 115<br>(38.9%)               | B<br>N = 181<br>(61.1%) | P-value | A<br>N = 137<br>(46.3%)                    | B<br>N = 159<br>(53.7%) | P-value |
| Hypertension (%)                  | 0.0                        | 99.4                    | <0.001  | 37.6                         | 95.6                    | <0.001  | 0.0                                   | 77.9                    | <0.001  | 0.0                                        | 81.1                    | <0.001  |
| Diabetes Mellitus (%)             | 14.3                       | 45.0                    | <0.001  | 7.5                          | 72.8                    | <0.001  | 0.0                                   | 42.4                    | <0.001  | 0.0                                        | 44.1                    | <0.001  |
| Ischemic Heart Disease (%)        | 14.3                       | 30.6                    | 0.002   | 7.5                          | 50.9                    | <0.001  | 0.0                                   | 31.2                    | <0.001  | 0.0                                        | 32.4                    | <0.001  |
| Atrial Fibrillation (%)           | 8.9                        | 17.2                    | 0.05    | 8.1                          | 24.6                    | <0.001  | 0.0                                   | 18.2                    | <0.001  | 0.0                                        | 18.9                    | <0.001  |
| Carotid Stenosis (%)              | 3.6                        | 18.9                    | <0.001  | 5.8                          | 23.7                    | <0.001  | 0.0                                   | 16.5                    | <0.001  | 0.0                                        | 17.1                    | <0.001  |
| Chronic Kidney Disease (%)        | 12.5                       | 15.0                    | 0.55    | 16.2                         | 11.4                    | 0.26    | 0.0                                   | 17.                     | <0.001  | 12.2                                       | 14.4                    | 0.63    |
| Cardiac Ejection Fraction<40% (%) | 1.8                        | 12.2                    | 0.002   | 4.0                          | 14.9                    | 0.001   | 0.0                                   | 10.4                    | 0.01    | 0.0                                        | 10.8                    | 0.003   |
| Active Neoplasm (%)               | 5.4                        | 8.3                     | 0.34    | 4.0                          | 12.3                    | 0.01    | 0.0                                   | 9.1                     | 0.01    | 0.0                                        | 9.5                     | 0.01    |
| Rheumatological Disease (%)       | 0.9                        | 2.2                     | 0.40    | 2.3                          | 0.9                     | 0.36    | 0.0                                   | 2.2                     | 0.23    | 0.0                                        | 2.3                     | 0.19    |
| Previous Stroke/TIA (%)           | 1.8                        | 1.7                     | 0.94    | 1.2                          | 2.6                     | 0.35    | 0.0                                   | 2.2                     | 0.23    | 0.0                                        | 2.3                     | 0.19    |
| Current Smoker (%)                | 6.3                        | 22.8                    | <0.001  | 11.0                         | 23.7                    | 0.004   | 0.0                                   | 20.8                    | <0.001  | 0.0                                        | 21.6                    | <0.001  |

## Methods; Supplemental Table 14. Dividing the SARS-CoV-2 infected acute ischemic stroke patients into 3 subgroups

The table shows the structure of the models for grouping the patients into 3 subgroups using machine learning (ML) and experts opinion (EX) models by considering the present comorbidities. ML-K<sub>3</sub> used hierarchal clustering and K-means, while ML-S<sub>3</sub> used spectral clustering, EX-A<sub>3</sub> used all 11 collected comorbidities and EX-S<sub>3</sub> used 8 selected comorbidities, to separate patients into 3 subgroups.

| Model                             | Machine Learning           |                        |                         |         |                              |                        |                         |         | Clinicians' Expert Opinion            |                         |                        |         |                                            |                         |                        |         |
|-----------------------------------|----------------------------|------------------------|-------------------------|---------|------------------------------|------------------------|-------------------------|---------|---------------------------------------|-------------------------|------------------------|---------|--------------------------------------------|-------------------------|------------------------|---------|
|                                   | ML-K <sub>3</sub> (K-Mean) |                        |                         |         | ML-S <sub>3</sub> (Spectral) |                        |                         |         | EX-A <sub>3</sub> (All Comorbidities) |                         |                        |         | EX-S <sub>3</sub> (Selected Comorbidities) |                         |                        |         |
| Comorbidities                     | A<br>N = 99<br>(33.9%)     | B<br>N = 87<br>(29.8%) | C<br>N = 106<br>(36.3%) | P-value | A<br>N = 123<br>(42.9%)      | B<br>N = 44<br>(15.3%) | C<br>N = 120<br>(41.8%) | P-value | A<br>N = 65<br>(22.0%)                | B<br>N = 140<br>(47.3%) | C<br>N = 91<br>(30.7%) | P-value | A<br>N = 74<br>(25.0%)                     | B<br>N = 147<br>(49.7%) | C<br>N = 75<br>(25.3%) | P-value |
| Hypertension (%)                  | 100.0                      | 92.0                   | 0.0                     | <0.001  | 98.4                         | 90.9                   | 10.8                    | <0.001  | 0.0                                   | 67.9                    | 93.4                   | <0.001  | 0.0                                        | 72.8                    | 97.3                   | <0.001  |
| Diabetes Mellitus (%)             | 0.0                        | 100.0                  | 9.4                     | <0.001  | 41.5                         | 77.3                   | 9.2                     | <0.001  | 0.0                                   | 26.4                    | 67.0                   | <0.001  | 0.0                                        | 29.3                    | 73.3                   | <0.001  |
| Ischemic Heart Disease (%)        | 25.3                       | 41.4                   | 9.4                     | <0.001  | 0.8                          | 100.0                  | 21.7                    | <0.001  | 0.0                                   | 13.6                    | 58.2                   | <0.001  | 0.0                                        | 17.0                    | 62.7                   | <0.001  |
| Atrial Fibrillation (%)           | 18.2                       | 16.1                   | 8.5                     | 0.11    | 13.0                         | 38.6                   | 7.5                     | <0.001  | 0.0                                   | 8.6                     | 33.0                   | <0.001  | 0.0                                        | 9.5                     | 37.3                   | <0.001  |
| Carotid Stenosis (%)              | 13.1                       | 24.1                   | 3.8                     | <0.001  | 12.2                         | 38.6                   | 4.2                     | <0.001  | 0.0                                   | 7.9                     | 29.7                   | <0.001  | 0.0                                        | 8.2                     | 34.7                   | <0.001  |
| Chronic Kidney Disease (%)        | 17.2                       | 11.5                   | 13.2                    | 0.51    | 21.1                         | 6.8                    | 10.0                    | 0.01    | 0.0                                   | 16.4                    | 19.8                   | 0.001   | 0.0                                        | 15.6                    | 12.0                   | 0.67    |
| Cardiac Ejection Fraction<40% (%) | 12.1                       | 11.                    | 1.9                     | 0.01    | 10.6                         | 18.2                   | 2.5                     | 0.003   | 0.0                                   | 4.3                     | 19.8                   | <0.001  | 0.0                                        | 4.8                     | 22.7                   | <0.001  |
| Active Neoplasm (%)               | 8.1                        | 10.3                   | 3.8                     | 0.20    | 4.1                          | 22.7                   | 5.0                     | <0.001  | 0.0                                   | 3.6                     | 17.6                   | <0.001  | 0.0                                        | 8.2                     | 12.0                   | <0.001  |
| Rheumatological Disease (%)       | 3.0                        | 1.1                    | 0.9                     | 0.46    | 3.3                          | 0.0                    | 0.8                     | 0.22    | 0.0                                   | 1.4                     | 3.3                    | 0.27    | 0.0                                        | 2.7                     | 1.3                    | 0.32    |
| Previous Stroke/TIA (%)           | 1.0                        | 3.4                    | 0.9                     | 0.33    | 1.6                          | 4.5                    | 0.8                     | 0.27    | 0.0                                   | 1.4                     | 3.3                    | 0.27    | 0.0                                        | 1.4                     | 4.0                    | 0.15    |
| Current Smoker (%)                | 24.2                       | 19.5                   | 6.6                     | 0.002   | 19.5                         | 27.3                   | 8.3                     | 0.01    | 0.0                                   | 12.9                    | 33.0                   | <0.001  | 0.0                                        | 14.3                    | 36.0                   | <0.001  |

## Methods: Supplemental Table 15A. Dividing the SARS-CoV-2 infected acute ischemic stroke patients into 4 and 5 subgroups by Spectral clustering

The table shows the structure of the models for grouping the patients into 4 and 5 subgroups using machine learning (ML) models (spectral clustering) by considering the present comorbidities. ML-S<sub>4</sub> used spectral clustering to divide the patients into 4 groups while ML-S<sub>5</sub> separated the patients into 5 subgroups.

| Models                            | Machine Learning             |                         |                        |                        |         |                              |                        |                         |                       |                        |         |
|-----------------------------------|------------------------------|-------------------------|------------------------|------------------------|---------|------------------------------|------------------------|-------------------------|-----------------------|------------------------|---------|
|                                   | ML-S <sub>4</sub> (Spectral) |                         |                        |                        |         | ML-S <sub>5</sub> (Spectral) |                        |                         |                       |                        |         |
| Comorbidities                     | A<br>N = 57<br>(19.3%)       | B<br>N = 112<br>(37.8%) | C<br>N = 38<br>(12.8%) | D<br>N = 89<br>(30.1%) | P-value | A<br>N = 20<br>(6.8%)        | B<br>N = 89<br>(30.1%) | C<br>N = 112<br>(37.8%) | D<br>N = 19<br>(6.4%) | E<br>N = 56<br>(18.9%) | P-value |
| Hypertension (%)                  | 100.0                        | 0.0                     | 89.5                   | 100.0                  | <0.001  | 95.0                         | 100.0                  | 0.0                     | 84.2                  | 100.0                  | <0.001  |
| Diabetes Mellitus (%)             | 100.0                        | 11.6                    | 73.7                   | 0.0                    | <0.001  | 85.0                         | 0.0                    | 13.4                    | 52.6                  | 100.0                  | <0.001  |
| Ischemic Heart Disease (%)        | 10.5                         | 11.6                    | 100.0                  | 16.9                   | <0.001  | 95.0                         | 16.9                   | 11.6                    | 100.0                 | 10.7                   | <0.001  |
| Atrial Fibrillation (%)           | 10.5                         | 8.0                     | 44.7                   | 11.2                   | <0.001  | 10.0                         | 11.2                   | 6.3                     | 89.5                  | 10.7                   | <0.001  |
| Carotid Stenosis (%)              | 14.0                         | 3.6                     | 44.7                   | 10.1                   | <0.001  | 85.0                         | 10.1                   | 3.6                     | 5.3                   | 12.5                   | <0.001  |
| Chronic Kidney Disease (%)        | 14.0                         | 12.5                    | 7.9                    | 18.0                   | 0.46    | 15.0                         | 18.0                   | 12.5                    | 0.0                   | 14.3                   | 0.34    |
| Cardiac Ejection Fraction<40% (%) | 7.0                          | 1.8                     | 21.1                   | 11.2                   | 0.001   | 15.0                         | 11.2                   | 1.8                     | 26.3                  | 7.1                    | 0.002   |
| Active Neoplasm (%)               | 1.8                          | 3.6                     | 26.3                   | 6.7                    | <0.001  | 30.0                         | 6.7                    | 4.5                     | 15.8                  | 1.8                    | <0.001  |
| Rheumatological Disease (%)       | 1.8                          | 0.9                     | 0.0                    | 3.4                    | 0.46    | 0.0                          | 3.4                    | 0.9                     | 0.0                   | 1.8                    | 0.62    |
| Previous Stroke/TIA (%)           | 1.8                          | 0.9                     | 5.3                    | 1.1                    | 0.32    | 5.0                          | 1.1                    | 0.9                     | 5.3                   | 1.8                    | 0.50    |
| Current Smoker (%)                | 14.0                         | 6.3                     | 31.6                   | 23.6                   | <0.001  | 65.0                         | 23.6                   | 6.3                     | 0.0                   | 12.5                   | <0.001  |

## Methods: Supplemental Table 15B. Dividing the SARS-CoV-2 infected acute ischemic stroke patients into 4 and 5 subgroups based on K-Mean Clustering

The table shows the structure of the models for grouping the patients into 4 and 5 subgroups using machine learning (ML) models (K-Mean) by considering the present comorbidities. ML-S<sub>4</sub> used spectral clustering to divide the patients into 4 groups while ML-S<sub>5</sub> separated the patients into 5 subgroups.

|                                   | Machine Learning           |                       |                       |                       |         |                            |                       |                       |                       |                      |         |
|-----------------------------------|----------------------------|-----------------------|-----------------------|-----------------------|---------|----------------------------|-----------------------|-----------------------|-----------------------|----------------------|---------|
|                                   | ML-K <sub>4</sub> (K-Mean) |                       |                       |                       |         | ML-K <sub>5</sub> (K-Mean) |                       |                       |                       |                      |         |
|                                   | A<br>N= 74<br>(25.3%)      | B<br>N= 95<br>(32.5%) | C<br>N= 62<br>(21.2%) | D<br>N= 61<br>(20.9%) | P-Value | A<br>N= 85<br>(29.1%)      | B<br>N= 39<br>(18.8%) | C<br>N= 55<br>(18.8%) | D<br>N= 49<br>(16.8%) | E<br>N=64<br>(21.9%) | P-Value |
| Hypertension (%)                  | 100.0                      | 0.0                   | 87.1                  | 83.6                  | <0.001  | 0.0                        | 74.4                  | 81.8                  | 83.7                  | 100.0                | <0.001  |
| Diabetes Mellitus (%)             | 0.0                        | 0.0                   | 58.1                  | 100.0                 | <0.001  | 0.0                        | 33.3                  | 100.0                 | 59.2                  | 0.0                  | <0.001  |
| Ischemic Heart Disease (%)        | 0.0                        | 9.5                   | 100.0                 | 0.0                   | <0.001  | 5.9                        | 43.6                  | 0.0                   | 100.0                 | 0.0                  | <0.001  |
| Atrial Fibrillation (%)           | 13.5                       | 8.4                   | 27.4                  | 9.8                   | 0.006   | 0.0                        | 100.0                 | 0.0                   | 4.1                   | 0.0                  | <0.001  |
| Carotid Stenosis (%)              | 10.8                       | 4.2                   | 29.0                  | 13.1                  | <0.001  | 4.7                        | 5.1                   | 12.7                  | 34.7                  | 12.5                 | <0.001  |
| Chronic Kidney Disease (%)        | 20.3                       | 12.6                  | 6.5                   | 16.4                  | 0.12    | 12.9                       | 7.7                   | 16.4                  | 8.2                   | 21.9                 | 0.178   |
| Cardiac Ejection Fraction<40% (%) | 12.2                       | 1.1                   | 14.5                  | 8.2                   | 0.01    | 1.2                        | 20.5                  | 7.3                   | 12.2                  | 7.8                  | 0.006   |
| Active Neoplasm (%)               | 5.4                        | 1.1                   | 21.0                  | 4.9                   | <0.001  | 0.0                        | 7.7                   | 5.5                   | 22.4                  | 6.3                  | <0.001  |
| Rheumatological Disease (%)       | 4.1                        | 1.1                   | 0.                    | 1.6                   | 0.29    | 0.0                        | 5.1                   | 0.0                   | 0.0                   | 4.7                  | 0.05    |
| Previous Stroke/TIA (%)           | 1.4                        | 1.1                   | 3.2                   | 1.6                   | 0.76    | 1.2                        | 2.6                   | 1.8                   | 2.0                   | 1.6                  | 0.99    |
| Current Smoker (%)                | 23.0                       | 7.4                   | 25.8                  | 13.1                  | 0.006   | 5.9                        | 7.7                   | 14.5                  | 36.7                  | 21.9                 | <0.001  |

## Methods; Supplemental Table 16. Dividing the SARS-CoV-2 infected patients with intraparenchymal hemorrhage into 2 subgroups

The table shows the structure of the models for grouping the patients into 2 subgroups using machine learning (ML) and expert opinion (EX) models by considering the present comorbidities. ML-K<sub>2</sub> used hierarchal clustering and K-means, while ML-S<sub>2</sub> used spectral clustering, EX-A<sub>2</sub> used all 11 collected comorbidities and EX-S<sub>2</sub> used 8 selected comorbidities, to separate patients into 2 subgroups.

| Model                             | Machine Learning           |                        |         |                              |                        |         | Clinicians' Expert Opinion            |                        |         |                                            |                        |         |
|-----------------------------------|----------------------------|------------------------|---------|------------------------------|------------------------|---------|---------------------------------------|------------------------|---------|--------------------------------------------|------------------------|---------|
|                                   | ML-K <sub>2</sub> (K-mean) |                        |         | ML-S <sub>2</sub> (Spectral) |                        |         | EX-A <sub>2</sub> (All Comorbidities) |                        |         | EX-A <sub>2</sub> (Selected Comorbidities) |                        |         |
| Comorbidities                     | A<br>N = 40<br>(70.2%)     | B<br>N = 17<br>(29.8%) | P-value | A<br>N = 23<br>(34.3%)       | B<br>N = 44<br>(65.7%) | P-value | A<br>N = 38<br>(55.9%)                | B<br>N = 30<br>(44.1%) | P-value | A<br>N = 39<br>(57.4%)                     | B<br>N = 29<br>(42.6%) | P-value |
| Hypertension (%)                  | 55.0                       | 88.2                   | 0.02    | 78.3                         | 56.8                   | 0.08    | 42.1                                  | 90.0                   | <0.001  | 43.6                                       | 89.7                   | <0.001  |
| Diabetes Mellitus (%)             | 2.5                        | 94.1                   | <0.001  | 73.9                         | 9.1                    | <0.001  | 2.6                                   | 66.7                   | <0.001  | 2.6                                        | 69.0                   | <0.001  |
| Ischemic Heart Disease (%)        | 5.0                        | 58.8                   | <0.001  | 43.5                         | 4.5                    | <0.001  | 0.0                                   | 40.0                   | <0.001  | 0.0                                        | 41.4                   | <0.001  |
| Atrial Fibrillation (%)           | 0.0                        | 11.8                   | 0.03    | 13.0                         | 0.0                    | 0.01    | 0.0                                   | 10.0                   | 0.05    | 0.0                                        | 10.3                   | 0.04    |
| Carotid Stenosis (%)              | 0.0                        | 11.8                   | 0.03    | 8.7                          | 0.0                    | 0.05    | 0.0                                   | 6.7                    | 0.11    | 0.0                                        | 6.9                    | 0.10    |
| Chronic Kidney Disease (%)        | 15.0                       | 11.8                   | 0.75    | 13.0                         | 13.6                   | 0.95    | 5.3                                   | 23.3                   | 0.03    | 7.7                                        | 20.7                   | 0.12    |
| Cardiac Ejection Fraction<40% (%) | 0.0                        | 41.2                   | <0.001  | 21.7                         | 4.5                    | 0.03    | 0.0                                   | 23.3                   | 0.002   | 0.0                                        | 24.1                   | 0.001   |
| Active Neoplasm (%)               | 0.0                        | 23.5                   | 0.001   | 13.0                         | 2.3                    | 0.08    | 0.0                                   | 13.3                   | 0.20    | 0.0                                        | 13.8                   | 0.02    |
| Rheumatological Disease (%)       | 0.0                        | 0.0                    | -       | 0.0                          | 0.0                    | -       | 0.0                                   | 0.0                    | -       | 0.0                                        | 0.0                    | -       |
| Previous Stroke/TIA (%)           | 0.0                        | 0.0                    | -       | 0.0                          | 0.0                    | -       | 0.0                                   | 0.0                    | -       | 0.0                                        | 0.0                    | -       |
| Current Smoker (%)                | 10.0                       | 29.4                   | 0.07    | 26.1                         | 11.4                   | 0.12    | 0.0                                   | 36.7                   | <0.001  | 0.0                                        | 37.9                   | <0.001  |

## Methods; Supplemental Table 17. Dividing the SARS-CoV-2 infected patients with intraparenchymal hemorrhage into 3 subgroups

The table shows the structure of the models for grouping the patients into 3 subgroups using machine learning (ML) and experts' opinion (EX) models by considering the present comorbidities. ML-K<sub>3</sub> used hierarchal clustering and K-means, while ML-S<sub>3</sub> used spectral clustering, EX-A<sub>3</sub> used all 11 collected comorbidities and EX-S<sub>3</sub> used 8 selected comorbidities, to separate patients into 3 subgroups.

| Model                             | Machine Learning           |                        |                        |         |                              |                        |                        |         | Clinicians' Expert Opinion            |                        |                        |         |                                            |                        |                        |         |
|-----------------------------------|----------------------------|------------------------|------------------------|---------|------------------------------|------------------------|------------------------|---------|---------------------------------------|------------------------|------------------------|---------|--------------------------------------------|------------------------|------------------------|---------|
|                                   | ML-K <sub>3</sub> (K-mean) |                        |                        |         | ML-S <sub>3</sub> (Spectral) |                        |                        |         | EX-A <sub>3</sub> (All Comorbidities) |                        |                        |         | EX-S <sub>3</sub> (Selected Comorbidities) |                        |                        |         |
| Comorbidities                     | A<br>N = 23<br>(40.4%)     | B<br>N = 19<br>(33.3%) | C<br>N = 15<br>(26.3%) | P-value | A<br>N = 20<br>(29.9%)       | B<br>N = 28<br>(41.8%) | C<br>N = 19<br>(28.4%) | P-value | A<br>N = 19<br>(27.9%)                | B<br>N = 31<br>(45.6%) | C<br>N = 18<br>(26.5%) | P-value | A<br>N = 21<br>(30.9%)                     | B<br>N = 33<br>(48.5%) | C<br>N = 14<br>(20.6%) | P-value |
| Hypertension (%)                  | 100                        | 0                      | 93.3                   | <0.001  | 75                           | 100                    | 0                      | <0.001  | 0                                     | 83.9                   | 94.4                   | <0.001  | 0                                          | 90.9                   | 92.9                   | <0.001  |
| Diabetes Mellitus (%)             | 0                          | 10.5                   | 100                    | <0.001  | 70                           | 17.9                   | 10.5                   | <0.001  | 0                                     | 22.6                   | 77                     | <0.001  | 0                                          | 24.2                   | 92.9                   | <0.001  |
| Ischemic Heart Disease (%)        | 8.7                        | 0                      | 66.7                   | <0.001  | 50                           | 7.1                    | 0                      | <0.001  | 0                                     | 6                      | 55.6                   | <0.001  | 0                                          | 6.1                    | 71.4                   | <0.001  |
| Atrial Fibrillation (%)           | 0                          | 0                      | 13.3                   | 0.06    | 10                           | 3.6                    | 0                      | 0.31    | 0                                     | 3.2                    | 11.1                   | 0.24    | 0                                          | 3                      | 14.3                   | 0.11    |
| Carotid stenosis (%)              | 0                          | 0                      | 13.3                   | 0.06    | 10                           | 0                      | 0                      | 0.09    | 0                                     | 0                      | 11.1                   | 0.06    | 0                                          | 0                      | 14.3                   | 0.02    |
| Chronic Kidney Disease (%)        | 17.4                       | 10.5                   | 13.3                   | 0.81    | 10                           | 17.9                   | 10.5                   | 0.67    | 0                                     | 9.7                    | 33.3                   | 0.01    | 0                                          | 15.2                   | 14.3                   | 0.83    |
| Cardiac Ejection Fraction<40% (%) | 95.7                       | 94.7                   | 66.7                   | 0.02    | 10                           | 14.3                   | 5.3                    | 0.61    | 0                                     | 3.2                    | 66.7                   | 0.001   | 0                                          | 3                      | 57.1                   | <0.001  |
| Active Neoplasm (%)               | 4.3                        | 0                      | 20                     | 0.06    | 15                           | 3.6                    | 0                      | 0.11    | 0                                     | 0                      | 22.2                   | 0.003   | 0                                          | 0                      | 28.6                   | <0.001  |
| Rheumatological Disease (%)       | 0                          | 0                      | 0                      | -       | 0                            | 0                      | 0                      | -       | 0                                     | 0                      | 0                      | -       | 0                                          | 0                      | 0                      | -       |
| Previous stroke/TIA (%)           | 0                          | 0                      | 0                      | -       | 0                            | 0                      | 0                      | -       | 0                                     | 0                      | 0                      | -       | 0                                          | 0                      | 0                      | -       |
| Current Smoker (%)                | 21.7                       | 0                      | 26.7                   | 0.06    | 30                           | 17.9                   | 0                      | 0.04    | 0                                     | 9.7                    | 44.4                   | <0.001  | 0                                          | 18.2                   | 35.7                   | 0.02    |



## Methods: Supplemental Table 18A. Dividing the SARS-CoV-2 infected patients with intraparenchymal hemorrhage into 4 and 5 subgroups by Spectral Clustering

The table shows the structure of the models for grouping the patients into 4 and 5 subgroups using machine learning (ML) models (spectral clustering) by considering the present comorbidities. ML-S<sub>4</sub> used spectral clustering to divide the patients into 4 groups while ML-S<sub>5</sub> separated the patients into 5 subgroups.

| Model                             | Machine Learning             |                        |                      |                        |         |                              |                      |                       |                        |                      |         |
|-----------------------------------|------------------------------|------------------------|----------------------|------------------------|---------|------------------------------|----------------------|-----------------------|------------------------|----------------------|---------|
|                                   | ML-S <sub>4</sub> (Spectral) |                        |                      |                        |         | ML-S <sub>5</sub> (Spectral) |                      |                       |                        |                      |         |
| Comorbidities                     | A<br>N = 35<br>(52.2%)       | B<br>N = 10<br>(14.9%) | C<br>N = 3<br>(4.5%) | D<br>N = 19<br>(28.4%) | P-value | A<br>N = 39<br>(58.2%)       | B<br>N = 2<br>(3.0%) | C<br>N = 8<br>(11.9%) | D<br>N = 15<br>(22.4%) | E<br>N = 3<br>(4.5%) | P-value |
| Hypertension (%)                  | 88.6                         | 90.0                   | 100.0                | 0.0                    | <0.001  | 53.8                         | 100.0                | 87.5                  | 66.7                   | 100.0                | 0.16    |
| Diabetes Mellitus (%)             | 25.7                         | 100.0                  | 0.0                  | 10.5                   | <0.001  | 7.7                          | 100.0                | 100.0                 | 53.3                   | 0.0                  | <0.001  |
| Ischemic Heart Disease (%)        | 5.7                          | 100.0                  | 0.0                  | 0.0                    | <0.001  | 5.1                          | 100.0                | 100.0                 | 0.0                    | 0.0                  | <0.001  |
| Atrial Fibrillation (%)           | 5.7                          | 10.0                   | 0.0                  | 0.0                    | 0.60    | 0.0                          | 0.0                  | 12.5                  | 13.3                   | 0.0                  | 0.20    |
| Carotid Stenosis (%)              | 0.0                          | 20.0                   | 0.0                  | 0.0                    | 0.01    | 0.0                          | 50.0                 | 12.5                  | 0.0                    | 0.0                  | 0.001   |
| Chronic Kidney Disease (%)        | 8.6                          | 10.0                   | 100.0                | 10.5                   | <0.001  | 7.7                          | 0.0                  | 12.5                  | 13.3                   | 100.0                | <0.001  |
| Cardiac Ejection Fraction<40% (%) | 11.4                         | 20.0                   | 0.0                  | 5.3                    | 0.59    | 0.0                          | 100.0                | 0.0                   | 33.3                   | 0.0                  | <0.001  |
| Active Neoplasm (%)               | 2.9                          | 30.0                   | 0.0                  | 0.0                    | 0.01    | 0.0                          | 100.0                | 12.5                  | 6.7                    | 0.0                  | <0.001  |
| Rheumatological Disease (%)       | 0.0                          | 0.0                    | 0.0                  | 0.0                    | -       | 0.0                          | 0.0                  | 0.0                   | 0.0                    | 0.0                  | -       |
| Previous Stroke/TIA (%)           | 0.0                          | 0.0                    | 0.0                  | 0.0                    | -       | 0.0                          | 0.0                  | 0.0                   | 0.0                    | 0.0                  | -       |
| Current Smoker (%)                | 11.4                         | 40.0                   | 100.0                | 0.0                    | <0.001  | 2.6                          | 0.0                  | 50.0                  | 20.0                   | 100.0                | <0.001  |

## Methods: Supplemental Table 18B. Dividing the SARS-CoV-2 infected patients with intraparenchymal hemorrhage into 4 and 5 subgroups by K-Mean clustering

The table shows the structure of the models for grouping the patients into 4 and 5 subgroups using machine learning (ML) models (K-Mean clustering) by considering the present comorbidities. ML-S<sub>4</sub> used spectral clustering to divide the patients into 4 groups while ML-S<sub>5</sub> separated the patients into 5 subgroups.

| Models                            | Machine Learning           |                     |                      |                      |         |                            |                    |                      |                      |                     |         |
|-----------------------------------|----------------------------|---------------------|----------------------|----------------------|---------|----------------------------|--------------------|----------------------|----------------------|---------------------|---------|
|                                   | ML-K <sub>4</sub> (K-Mean) |                     |                      |                      |         | ML-K <sub>5</sub> (K-Mean) |                    |                      |                      |                     |         |
|                                   | A<br>N=10<br>17.5%         | B<br>N=7<br>(12.3%) | C<br>N=18<br>(31.6%) | D<br>N=22<br>(38.6%) | P-Value | A<br>N=10<br>(17.5%)       | B<br>N=5<br>(8.8%) | C<br>N=18<br>(31.6%) | D<br>N=18<br>(31.6%) | E<br>N=6<br>(10.5%) | P-Value |
| <b>Comorbidities</b>              |                            |                     |                      |                      |         |                            |                    |                      |                      |                     |         |
| Hypertension (%)                  | 90.0                       | 85.7                | 0.0                  | 100.0                | <0.001  | 90.0                       | 100.0              | 0.0                  | 100.0                | 83.3                | <0.001  |
| Diabetes Mellitus (%)             | 80.0                       | 85.7                | 5.6                  | 9.1                  | <0.001  | 100.0                      | 0.0                | 5.6                  | 0.0                  | 100.0               | <0.001  |
| Ischemic Heart Disease (%)        | 100.0                      | 28.6                | 0.0                  | 0.0                  | <0.001  | 100.0                      | 0.0                | 0.0                  | 11.1                 | 0.0                 | <0.001  |
| Atrial Fibrillation (%)           | 10.0                       | 14.3                | 0.0                  | 0.0                  | 0.16    | 10.0                       | 0.0                | 0.0                  | 0.0                  | 16.7                | 0.21    |
| Carotid Stenosis (%)              | 10.0                       | 14.3                | 0.0                  | 0.0                  | 0.16    | 20.0                       | 0.0                | 0.0                  | 0.0                  | 0.0                 | 0.04    |
| Chronic Kidney Disease (%)        | 10.0                       | 14.3                | 11.1                 | 18.2                 | 0.91    | 10.0                       | 60.0               | 11.1                 | 5.6                  | 16.7                | 0.04    |
| Cardiac Ejection Fraction<40% (%) | 0.0                        | 100.0               | 0.0                  | 0.0                  | <0.001  | 20.0                       | 20.0               | 0.0                  | 0.0                  | 66.7                | <0.001  |
| Active Neoplasm (%)               | 10.0                       | 42.9                | 0.0                  | 0.0                  | 0.001   | 30.0                       | 20.0               | 0.0                  | 0.0                  | 0.0                 | 0.01    |
| Rheumatological Disease (%)       | 0.0                        | 0.0                 | 0.0                  | 0.0                  | -       | 0.0                        | 0.0                | 0.0                  | 0.0                  | 0.0                 | -       |
| Previous Stroke/TIA (%)           | 0.0                        | 0.0                 | 0.0                  | 0.0                  | -       | 0.0                        | 0.0                | 0.0                  | 0.0                  | 0.0                 | -       |
| Current Smoker (%)                | 40.0                       | 14.3                | 0.0                  | 18.2                 | 0.5     | 40.0                       | 100.0              | 0.0                  | 0.0                  | 0.0                 | <0.001  |

# **Results; Contingency Matrices**

**Supplemental Figures 2-3**

## Results; Supplemental Figure 2

Contingency Matrices, models regarding the SARS-CoV-2 infected patients with acute ischemic stroke.

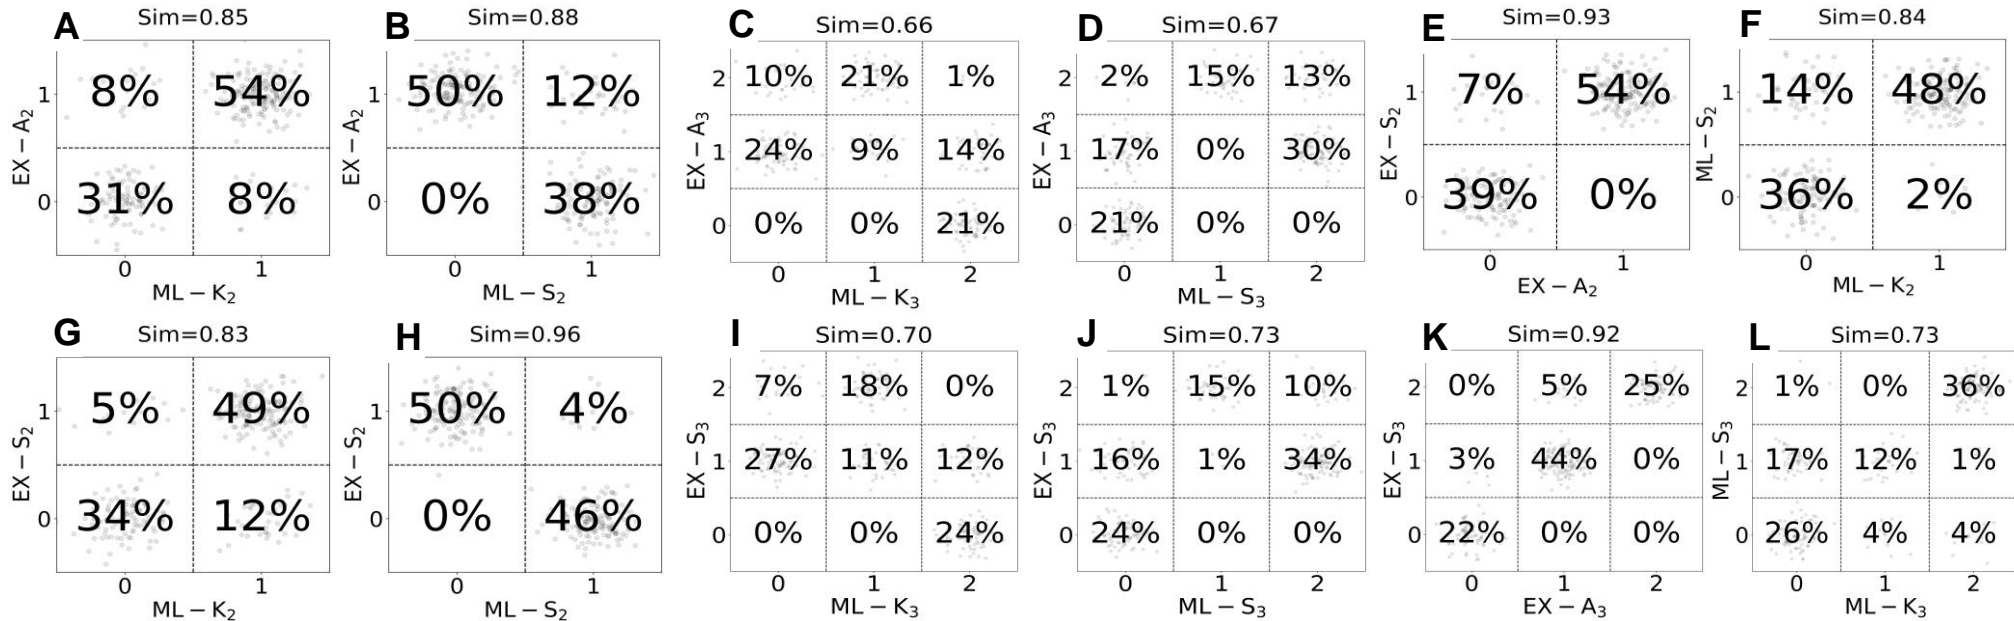

**Supplemental Figure 2.** The similarity of methods under different clustering models when grouping the patients with acute ischemic stroke into 2 and 3 subgroups. In models based on expert opinion (EX), EX-A included all 11 collected comorbidities and EX-S included 8 selected comorbidities. Patients were then clustered into two subgroups (EX-A<sub>2</sub> and EX-S<sub>2</sub>), with “0” referring to patients with zero or one comorbidities and “1” referring to patients with >1 comorbidity, or three subgroups (EX-A<sub>3</sub> and EX-S<sub>3</sub>), with “0” referring to patients without any known comorbidity, “1” referring to patients with one or two comorbidities, and “2” referring to patients with >2 comorbidities. In machine learning algorithms (ML) ML-K used hierarchal clustering and K-means, while ML-S used spectral clustering. Within each clustering, method patients were grouped into two (ML-K<sub>2</sub> and ML-S<sub>2</sub>) and three (ML-K<sub>3</sub> and ML-S<sub>3</sub>) clusters. Panel **A** shows the similarity between the 2 subgroups in EX-A<sub>2</sub> and ML-K<sub>2</sub>. Panel **B** shows the similarity between the 2 subgroups in EX-A<sub>2</sub> and ML-S<sub>2</sub>. Panel **C** shows the similarity between the 3 subgroups in EX-A<sub>3</sub> and ML-K<sub>3</sub>. Panel **D** shows the similarity between the 3 subgroups in EX-A<sub>3</sub> and ML-S<sub>3</sub>. Panel **E** shows the similarity between the 2 subgroups in EX-S<sub>2</sub> and EX-A<sub>2</sub>. Panel **F** shows the similarity between the 2 subgroups in ML-S<sub>2</sub> and ML-K<sub>2</sub>. Panel **G** shows the similarity between the 2 subgroups in EX-S<sub>2</sub> and ML-K<sub>2</sub>. Panel **H** shows the similarity between the 2 subgroups in EX-S<sub>2</sub> and ML-S<sub>2</sub>. Panel **I** shows the similarity between the 3 subgroups in EX-S<sub>3</sub> and ML-K<sub>3</sub>. Panel **J** shows the similarity between the 3 subgroups in EX-S<sub>3</sub> and ML-S<sub>3</sub>. Panel **K** shows the similarity between the 3 subgroups in EX-S<sub>3</sub> and EX-A<sub>3</sub>. Panel **L** shows the similarity between the 3 subgroups in ML-S<sub>3</sub> and ML-K<sub>3</sub>.

# Results; Supplemental Figure 3

Contingency Matrices, models regarding the SARS-CoV-2 infected patients with intraparenchymal hemorrhage.

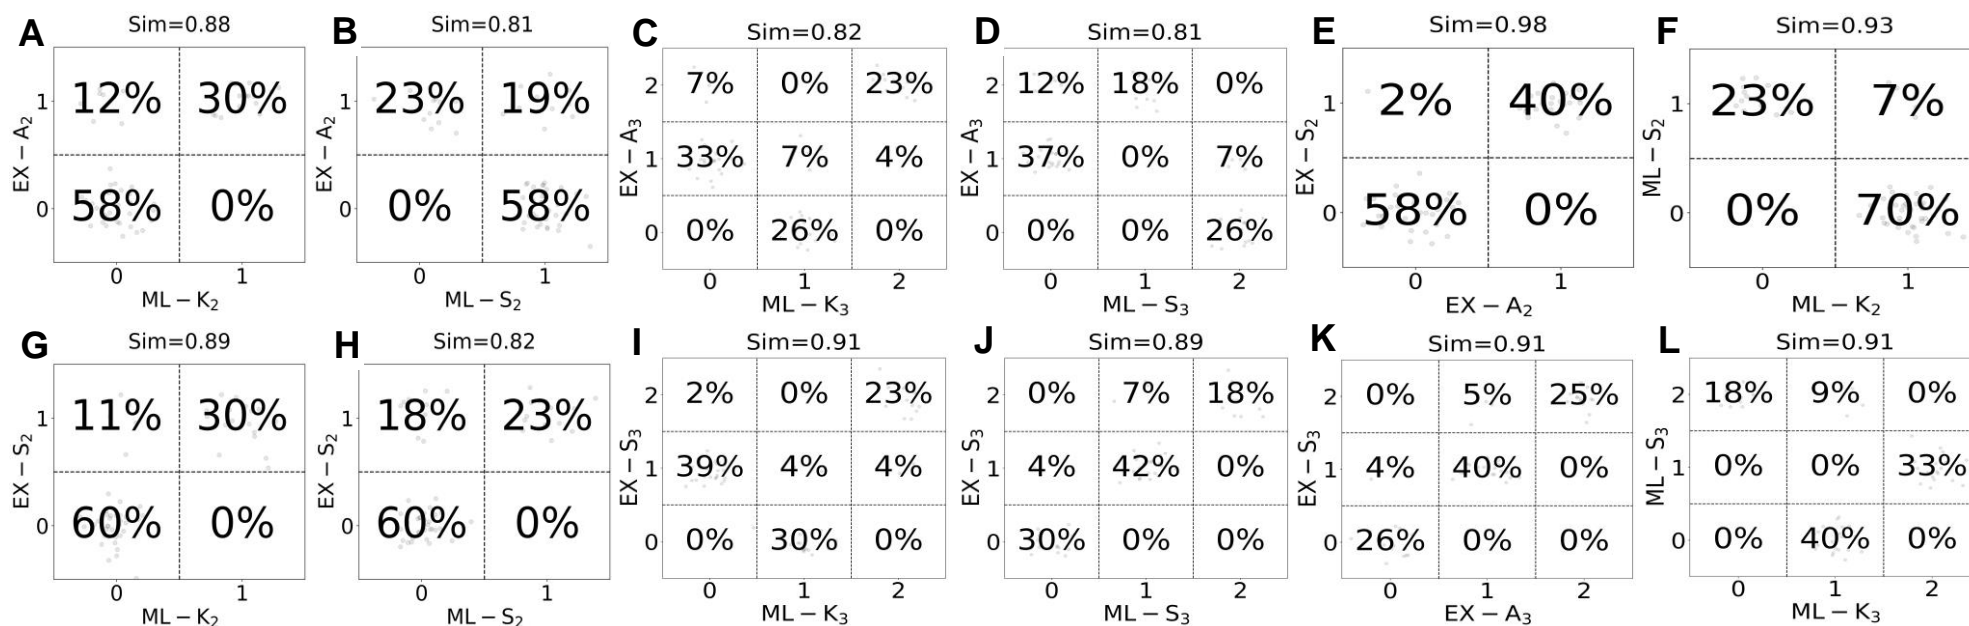

**Supplemental Figure 3.** The similarity of methods under different clustering models when grouping the patients with intraparenchymal hemorrhage into 2 and 3 subgroups. In models based on experts' opinion (EX), EX-A included all 11 collected comorbidities and EX-S included 8 selected comorbidities. Patients were then clustered into two subgroups (EX-A<sub>2</sub> and EX-S<sub>2</sub>), with "0" referring to patients with zero or one comorbidities and "1" referring to patients with >1 comorbidity, or three subgroups (EX-A<sub>3</sub> and EX-S<sub>3</sub>), with "0" referring to patients without any known comorbidity, "1" referring to patients with one or two comorbidities, and "2" referring to patients with >2 comorbidities. In machine learning algorithms (ML) ML-K used hierarchal clustering and K-means, while ML-S used spectral clustering. Within each clustering, method patients were grouped into two (ML-K<sub>2</sub> and ML-S<sub>2</sub>) and three (ML-K<sub>3</sub> and ML-S<sub>3</sub>) clusters. Panel **A** shows the similarity between the 2 subgroups in EX-A<sub>2</sub> and ML-K<sub>2</sub>. Panel **B** shows the similarity between the 2 subgroups in EX-A<sub>2</sub> and ML-S<sub>2</sub>. Panel **C** shows the similarity between the 3 subgroups in EX-A<sub>3</sub> and ML-K<sub>3</sub>. Panel **D** shows the similarity between the 3 subgroups in EX-A<sub>3</sub> and ML-S<sub>3</sub>. Panel **E** shows the similarity between the 2 subgroups in EX-S<sub>2</sub> and EX-A<sub>2</sub>. Panel **F** shows the similarity between the 2 subgroups in ML-S<sub>2</sub> and ML-K<sub>2</sub>. Panel **G** shows the similarity between the 2 subgroups in EX-S<sub>2</sub> and ML-K<sub>2</sub>. Panel **H** shows the similarity between the 2 subgroups in EX-S<sub>2</sub> and ML-S<sub>2</sub>. Panel **I** shows the similarity between the 3 subgroups in EX-S<sub>3</sub> and ML-K<sub>3</sub>. Panel **J** shows the similarity between the 3 subgroups in EX-S<sub>3</sub> and ML-S<sub>3</sub>. Panel **K** shows the similarity between the 3 subgroups in EX-S<sub>3</sub> and EX-A<sub>3</sub>. Panel **L** shows the similarity between the 3 subgroups in ML-S<sub>3</sub> and ML-K<sub>3</sub>.

# **Results**

## **Acute Ischemic Stroke; Comparing the Patients among the Comorbidities' Subgroups**

**Supplemental Tables 19-20**

## Results; Supplemental Table 19. Subgroups of AIS patients clustered into 2 groups

Baseline characteristics and laboratory findings among SARS-CoV-2 patients with an ischemic stroke, based on grouping the patients into 2 subgroups using machine learning (ML) and expert opinion (EX) models. ML-K<sub>2</sub> used hierarchal clustering and K-means, while ML-S<sub>2</sub> used spectral clustering, to separate patients into 2 subgroups. EX-A<sub>2</sub> used all 11 collected comorbidities and EX-S<sub>2</sub> used 8 selected comorbidities, to separate patients into 2 subgroups. [Blue ink indicates the post-hoc p values.](#)

| Model                                                               | Machine Learning           |                         |         |                              |                         |         | Expert Opinion                         |                         |         |                                            |                         |         |
|---------------------------------------------------------------------|----------------------------|-------------------------|---------|------------------------------|-------------------------|---------|----------------------------------------|-------------------------|---------|--------------------------------------------|-------------------------|---------|
|                                                                     | ML-K <sub>2</sub> (K-mean) |                         |         | ML-S <sub>2</sub> (Spectral) |                         |         | EX-A <sub>2</sub> (All comorbidities)  |                         |         | EX-S <sub>2</sub> (Selected Comorbidities) |                         |         |
| Parameter                                                           | A<br>N = 112<br>(38.4%)    | B<br>N = 180<br>(61.6%) | P-value | A<br>N = 173<br>(60.3%)      | B<br>N = 114<br>(39.7%) | P-value | A<br>N = 115<br>(38.9%)                | B<br>N = 181<br>(61.1%) | P-value | A<br>N = 137<br>(46.3%)                    | B<br>N = 159<br>(53.7%) | P-value |
| Age; Mean (SD); Years                                               | 62 ± 17                    | 70 ± 13                 | <0.001  | 66 ± 17                      | 68 ± 13                 | 0.20    | 61 ± 18                                | 69 ± 14                 | <0.001  | 62 ± 17                                    | 69 ± 14                 | <0.001  |
| Sex; Female; N (%)                                                  | 45 (40.2)                  | 70 (38.9)               | 0.08    | 66 (28.3)                    | 48 (42.1)               | 0.50    | 79 (44.9)                              | 83 (39.5)               | 0.29    | 86 (43.2)                                  | 76 (40.6)               | 0.61    |
| Large Vessel Occlusion; N (%)                                       | 46 (48.4)                  | 73 (42.7)               | 0.37    | 64 (42.1)                    | 54 (50.0)               | 0.21    | 43 (43.9)                              | 76 (44.4)               | 0.93    | 49 (41.2)                                  | 70 (46.7)               | 0.37    |
| Intravenous Thrombolysis; N (%)                                     | 16 (14.3)                  | 23 (12.8)               | 0.71    | 17 (9.8)                     | 23 (17.5)               | 0.06    | 13 (7.4)                               | 26 (12.4)               | 0.11    | 16 (8.0)                                   | 23 (12.3)               | 0.17    |
| Mechanical Thrombectomy; N (%)                                      | 10 (8.9)                   | 14 (7.8)                | 0.73    | 12 (6.9)                     | 12 (10.5)               | 0.28    | 9 (5.1)                                | 15 (7.1)                | 0.41    | 10 (5.0)                                   | 14 (7.5)                | 0.32    |
| National Institutes of Health Stroke Scale (NIHSS) Score; Mean (SD) | 12.0 ± 9.0                 | 11.0 ± 8.0              | 0.52    | 11.0 ± 8.0                   | 13.0 ± 8.0              | 0.11    | 11.0 ± 9.0                             | 12.0 ± 9.0              | 0.95    | 11.0 ± 9.0                                 | 12.0 ± 8.0              | 0.87    |
| Imaging Patterns                                                    |                            |                         |         |                              |                         |         |                                        |                         |         |                                            |                         |         |
| Embollic/Large Vessel athero-Thromboembolism; N (%)                 | 74 (83.1)                  | 131 (79.4)              |         | 115 (79.3)                   | 84 (80.8)               |         | 76 (83.5)                              | 195 (92.9)              |         | 189 (95.0)                                 | 173 (92.5)              |         |
| Lacune; N (%)                                                       | 10 (11.2)                  | 15 (9.1)                | 0.44    | 18 (12.4)                    | 8 (7.7)                 | 0.38    | 10 (11.0)                              | 16 (9.8)                | 0.43    | 14 (12.5)                                  | 12 (8.4)                | 0.56    |
| Border-zone; N (%)                                                  | 5 (5.6)                    | 18 (10.9)               |         | 12 (8.3)                     | 11 (10.6)               |         | 5 (5.5)                                | 18 (11.0)               |         | 9 (8.0)                                    | 14 (9.8)                |         |
| Vasculitis Pattern; N (%)                                           | 0 (0.0)                    | 1 (0.6)                 |         | 0 (0.0)                      | 1 (1.0)                 |         | 0 (0.0)                                | 1 (0.6)                 |         | 0 (0.0)                                    | 1 (0.7)                 |         |
| TOAST                                                               |                            |                         |         |                              |                         |         |                                        |                         |         |                                            |                         |         |
| Large-Artery Atherosclerosis; N (%)                                 | 25 (38.5)                  | 31 (29.8)               |         | 32 (31.1)                    | 24 (35.8)               |         | 21 (30.0)                              | 35 (34.7)               |         | 23 (28.4)                                  | 33 (36.7)               |         |
| Cardio-embolism; N (%)                                              | 11 (16.9)                  | 35 (33.7)               |         | 19 (18.4)                    | 27 (40.3)               |         | 10 (14.3)                              | 36 (35.6)               |         | 23 (28.4)                                  | 33 (36.7)               |         |
| Small-Vessel Occlusion; N (%)                                       | 7 (10.8)                   | 9 (8.7)                 | 0.03    | 11 (10.7)                    | 6 (9.0)                 | 0.002   | 1 (2.7)                                | 16 (12.0)               | <0.001  | 13 (16.0)                                  | 33 (36.7)               | 0.001   |
| Stroke of Other Determined Etiology; N (%)                          | 9 (13.8)                   | 4 (3.8)                 |         | 12 (11.7)                    | 1 (1.5)                 |         | 11 (15.7)                              | 2 (2.0)                 |         | 11 (13.6)                                  | 2 (2.2)                 |         |
| Stroke of Undetermined Etiology; N (%)                              | 13 (20.0)                  | 25 (24.0)               |         | 29 (28.2)                    | 9 (13.4)                |         | 21 (30.0)                              | 18 (17.8)               |         | 24 (29.6)                                  | 15 (16.7)               |         |
| Interval Between Onset to Index Event; Mean (SD); Days              | 6.0 ± 7.0                  | 5.0 ± 6.0               | 0.19    | 6.0 ± 7.0                    | 5.0 ± 7.0               | 0.68    | 7.0 ± 8.0                              | 5.0 ± 6.0               | 0.07    | 7.0 ± 7.0                                  | 5.0 ± 6.0               | 0.15    |
| Mechanical Ventilation; N (%)                                       | 36 (32.1)                  | 47 (26.1)               | 0.27    | 51 (29.5)                    | 32 (28.1)               | 0.80    | 22 (33.8)                              | 63 (27.3)               | 0.30    | 27 (36.5)                                  | 58 (26.1)               | 0.09    |
| Disposition*                                                        |                            |                         |         |                              |                         |         |                                        |                         |         |                                            |                         |         |
| Discharged Home; N (%)                                              | 53 (48.6)                  | 72 (40.2)               |         | 81 (47.4)                    | 43 (37.7)               |         | 66 (42.0)                              | 77 (36.7)               |         | 75 (41.7)                                  | 68 (36.4)               |         |
| In Hospital Mortality; N (%)                                        | 27 (24.8)                  | 49 (27.4)               | 0.36    | 41 (24.0)                    | 33 (28.9)               | 0.27    | 45 (28.7)                              | 72 (34.3)               | 0.46    | 52 (28.9)                                  | 65 (34.8)               | 0.44    |
| Still in Hospital/Subacute Care; N (%)                              | 29 (26.6)                  | 58 (32.4)               |         | 49 (28.7)                    | 38 (33.3)               |         | 46 (29.3)                              | 61 (29.0)               |         | 53 (29.4)                                  | 54 (28.9)               |         |
| Length of Hospital Stay; Mean (SD); Days                            | 14.0 ± 15.0                | 11 ± 9.0                | 0.14    | 13.0 ± 14.0                  | 11.0 ± 9.0              | 0.23    | 14.0 ± 15.0                            | 11.0 ± 11.0             | 0.16    | 16.0 ± 17.0                                | 11.0 ± 9.0              | 0.04    |
| Laboratory Findings                                                 |                            |                         |         |                              |                         |         |                                        |                         |         |                                            |                         |         |
| White Blood Cell Count; Mean (SD); x10 <sup>9</sup> /L              | 10.3 ± 5.3                 | 9.5 ± 4.5               | 0.13    | 9.9 ± 5.2                    | 9.8 ± 4.3               | 0.85    | 10.9 ± 7.3<br><a href="#">8 (0.05)</a> | 9.7 ± 4.6               | 0.05    | 10.7 ± 7.1                                 | 9.8 ± 4.5               | 0.13    |

| Model                                                     | Machine Learning           |                         |         |                              |                         |         | Expert Opinion                        |                         |         |                                            |                         |         |
|-----------------------------------------------------------|----------------------------|-------------------------|---------|------------------------------|-------------------------|---------|---------------------------------------|-------------------------|---------|--------------------------------------------|-------------------------|---------|
|                                                           | ML-K <sub>2</sub> (K-mean) |                         |         | ML-S <sub>2</sub> (Spectral) |                         |         | EX-A <sub>2</sub> (All comorbidities) |                         |         | EX-S <sub>2</sub> (Selected Comorbidities) |                         |         |
| Parameter                                                 | A<br>N = 112<br>(38.4%)    | B<br>N = 180<br>(61.6%) | P-value | A<br>N = 173<br>(60.3%)      | B<br>N = 114<br>(39.7%) | P-value | A<br>N = 115<br>(38.9%)               | B<br>N = 181<br>(61.1%) | P-value | A<br>N = 137<br>(46.3%)                    | B<br>N = 159<br>(53.7%) | P-value |
| White Blood Cell Count; Median [IQR]; x10 <sup>9</sup> /L | 9.2 [7.3 – 12.0]           | 8.9 [6.5 – 11.0]        | 0.33    | 8.9 [6.8 – 11.1]             | 9.2 [7.1 – 11.3]        | 0.38    | 9.5 [7.4 – 12.4]                      | 9.0 [6.8 – 11.1]        | 0.04    | 9.5 [7.4 – 12.1]                           | 9.0 [6.8 – 11.3]        | 0.13    |
| Neutrophil Count; Mean (SD); x10 <sup>9</sup> /L          | 8.2 ± 4.6                  | 7.4 ± 4.3               | 0.17    | 7.8 ± 4.6                    | 7.6 ± 4.2               | 0.81    | 8.7 ± 6.6                             | 7.5 ± 4.4               | 0.07    | 8.5 ± 6.5                                  | 7.6 ± 4.3               | 0.10    |
| Neutrophil Count; Median [IQR]; x10 <sup>9</sup> /L       | 7.3 [5.0 – 10.7]           | 6.5 [4.7 – 9.0]         | 0.15    | 6.6 [4.8 – 9.1]              | 7.2 [5.0 – 9.4]         | 0.61    | 7.4 [4.9 – 10.7]                      | 6.7 [4.8 – 9.1]         | 0.30    | 7.4 [4.9 – 10.3]                           | 6.7 [4.8 – 9.2]         | 0.35    |
| Lymphocyte Count; Mean (SD); x10 <sup>9</sup> /L          | 1.6 ± 1.5                  | 1.5 ± 1.0               | 0.38    | 1.6 ± 1.3                    | 1.5 ± 1.0               | 0.97    | 1.7 ± 1.6                             | 1.5 ± 0.9               | 0.09    | 1.7 ± 1.6                                  | 1.5 ± 0.9               | 0.18    |
| Lymphocyte; Median [IQR]; x10 <sup>9</sup> /L             | 1.4 [0.9 – 1.9]            | 1.3 [0.8 – 1.9]         | 0.31    | 1.3 [0.9 – 1.9]              | 1.3 [0.8 – 1.9]         | 0.94    | 1.4 [0.9 – 2.0]                       | 1.3 [0.9 – 1.9]         | 0.39    | 1.4 [0.9 – 2.0]                            | 1.3 [0.9 – 1.9]         | 0.74    |
| Platelet Count; Mean (SD); x10 <sup>9</sup> /L            | 311.5 ± 354.4              | 318.1 ± 522.6           | 0.91    | 293.2 ± 319.2                | 349.1 ± 621.6           | 0.34    | 294.9 ± 323.6                         | 289.7 ± 471.0           | 0.90    | 282.8 ± 308.8                              | 302.0 ± 495.0           | 0.67    |
| Platelet Count; Median [IQR]; x10 <sup>9</sup> /L         | 238.0 [171.0 – 350.0]      | 218.5 [154.0 – 318.0]   | 0.69    | 223.0 [163.0 – 338.0]        | 228.0 [156.0 – 320.0]   | 0.84    | 236.5 [164.0 – 337.0]                 | 192.0 [150.0 – 300.0]   | 0.06    | 223.0 [156.0 – 326.0]                      | 207.0 [154.0 – 310.0]   | 0.44    |
| Alanine Transaminase (ALT); Mean (SD); U/L                | 70.9 ± 80.1                | 57.7 ± 74.8             | 0.19    | 60.3 ± 72.5                  | 65.4 ± 83.1             | 0.61    | 69.9 ± 106.5                          | 59.3 ± 73.6             | 0.31    | 71.1 ± 104.8                               | 57.1 ± 72.4             | 0.17    |
| Alanine Transaminase (ALT); Median [IQR]; U/L             | 45.7 [12.0 – 101.7]        | 27.4 [14.0 – 44.0]      | 0.03    | 38.5 [8.5 – 87.5]            | 27.4 [12.0 – 110.0]     | 0.24    | 25.0 [14.0 – 41.0]                    | 24.8 [14.7 – 44.6]      | 0.24    | 25.0 [14.0 – 42.0]                         | 24.6 [14.4 – 44.0]      | 0.11    |
| Aspartate Transaminase (AST); Mean (SD); U/L              | 28.1 ± 24.4                | 33.2 ± 27.7             | 0.13    | 29.3 ± 24.4                  | 35.4 ± 30.3             | 0.10    | 39.9 ± 93.3                           | 34.3 ± 27.6             | 0.48    | 39.2 ± 88.4                                | 34.4 ± 28.1             | 0.50    |
| Aspartate Transaminase (AST); Median [IQR]; U/L           | 21.0 [13.0 – 35.0]         | 24.0 [14.0 – 44.0]      | 0.38    | 23.4 [14.0 – 36.0]           | 23.0 [14.0 – 48.0]      | 0.85    | 25.0 [14.0 – 41.0]                    | 24.8 [14.7 – 44.6]      | 0.92    | 25.0 [14.0 – 42.0]                         | 24.6 [14.4 – 44.0]      | 0.93    |
| Blood Urea Nitrogen (BUN); Mean (SD); mg/dl               | 50.1 ± 49.2                | 54.9 ± 134.6            | 0.74    | 56.2 ± 131.9                 | 47.2 ± 48.4             | 0.53    | 57.4 ± 117.8                          | 54.5 ± 126.0            | 0.84    | 64.8 ± 159.1                               | 45.7 ± 53.8             | 0.16    |
| Blood Urea Nitrogen (BUN); Median [IQR]; mg/dl            | 35.0 [23.0 – 56.0]         | 30.0 [20.0 – 46.5]      | 0.07    | 33.0 [21.0 – 50.0]           | 31.0 [21.0 – 50.0]      | 0.42    | 33.0 [23.0 – 50.0]                    | 32.0 [20.0 – 46.0]      | 0.41    | 33.0 [23.0 – 51.0]                         | 31.5 [20.0 – 46.0]      | 0.19    |
| Creatinine; Mean (SD); mg/dl                              | 1.4 ± 2.3                  | 1.5 ± 1.2               | 0.76    | 1.5 ± 2.0                    | 1.6 ± 1.3               | 0.53    | 1.5 ± 2.2                             | 1.8 ± 1.7               | 0.29    | 1.5 ± 2.1                                  | 1.8 ± 1.7               | 0.27    |
| Creatinine; Median [IQR]; mg/dl                           | 1.0 [0.8 – 1.3]            | 1.2 [0.9 – 1.5]         | 0.004   | 1.0 [0.8 – 1.3]              | 1.2 [0.9 – 1.6]         | 0.001   | 1.0 [0.8 – 1.3]                       | 1.2 [0.9 – 1.6]         | <0.001  | 1.0 [0.8 – 1.3]                            | 1.2 [0.9 – 1.6]         | 0.001   |
| C-Reactive Protein (CRP); Mean (SD); mg/L                 | 59.0 ± 76.0                | 64.0 ± 167.0            | 0.77    | 69.0 ± 170.0                 | 49.0 ± 41.0             | 0.27    | 57.4 ± 117.8                          | 54.5 ± 126.0            | 0.84    | 64.8 ± 159.1                               | 45.7 ± 53.8             | 0.09    |
| C-Reactive Protein (CRP); Median [IQR]; mg/L              | 39.0 [27.0 – 60.0]         | 34.0 [23.0 – 53.0]      | 0.19    | 36.0 [25.0 – 56.0]           | 35.0 [23.0 – 51.0]      | 1.00    | 37.0 [27.0 – 54.0]                    | 35.0 [24.0 – 55.0]      | 0.99    | 37.0 [27.0 – 56.0]                         | 34.0 [23.0 – 52.0]      | 0.91    |
| Lactate Dehydrogenase (LDH); Mean (SD); U/L               | 476.8 ± 277.2              | 720.4 ± 2129.1          | 0.33    | 397.4 ± 259.2                | 974.4 ± 2633.8          | 0.14    | 453.7 ± 379.7                         | 718.0 ± 2046.1          | 0.22    | 455.2 ± 378.0                              | 719.4 ± 2059.0          | 0.22    |
| Lactate Dehydrogenase (LDH); Median [IQR]; U/L            | 423.0 [281.0 – 610.0]      | 327.0 [203.0 – 478.0]   | 0.22    | 347.0 [224.0 – 490.0]        | 384.5 [237.0 – 523.0]   | 0.14    | 364.0 [250.0 – 558.0]                 | 357.0 [219.0 – 490.0]   | 0.94    | 365.0 [250.0 – 558.0]                      | 352.0 [218.0 – 489.5]   | 0.93    |
| Fibrinogen; Mean (SD); mg/dl                              | 290.7 ± 272.8              | 598.1 ± 1360.0          | 0.17    | 478.5 ± 1169.0               | 425.6 ± 845.8           | 0.83    | 341.8 ± 308.3                         | 595.6 ± 1360.9          | 0.25    | 341.2 ± 304.3                              | 616.3 ± 1411.0          | 0.22    |
| Fibrinogen; Median [IQR]; mg/dl                           | 219.5 [4.0 – 501.0]        | 178.0 [3.8 – 477.0]     | 0.74    | 216.0 [42.0 – 501.0]         | 149.0 [2.5 – 477.0]     | 0.54    | 317.0 [55.0 – 535.5]                  | 178.0 [3.0 – 484.0]     | 0.44    | 331.0 [53.9 – 565.0]                       | 149.0 [3.0 – 484.0]     | 0.31    |
| D-Dimer; Mean (SD); ng/ml                                 | 2066.5 ± 2787.4            | 1430.1 ± 2033.0         | 0.18    | 1401.4 ± 1542.0              | 1747.8 ± 2441.0         | 0.38    | 1891.4 ± 2554.0                       | 1727.7 ± 2348.0         | 0.71    | 1872.1 ± 2486.7                            | 1741.2 ± 2428.0         | 0.77    |
| D-Dimer; Median [IQR]; ng/ml                              | 1059.5 [568.0 – 2235.0]    | 995.0 [526.0 – 1883.0]  | 0.33    | 904.5 [485.0 – 1970.0]       | 1060.0 [561.0 – 2165.0] | 0.63    | 1008.0 [489.0 – 2200.0]               | 1060.0 [550.0 – 2085.0] | 1.00    | 1040.0 [2200.0]                            | 1027.0 [550.0 – 2085.0] | 1.00    |

\* Data on patients' disposition were sparse.



## Results; Supplemental Table 20. Subgroups of AIS patients clustered into 3 groups

Baseline characteristics among SARS-CoV-2 patients with an ischemic stroke, based on the clustering of patients into 3 subgroups using machine learning (ML) and experts' opinion (EX) models. ML-K<sub>3</sub> used hierarchal clustering and K-means, while ML-S<sub>3</sub> used spectral clustering, to separate patients into 3 subgroups. EX-A<sub>3</sub> used all 11 collected comorbidities and EX-S<sub>3</sub> used 8 selected comorbidities, to separate patients into 3 subgroups. [Blue ink indicates the post-hoc p values.](#)

| Model                                                               | Machine Learning                         |                                      |                         |         |                                          |                                                                     |                         |         | Expert Opinion                                                        |                                                                         |                        |         |                                                                           |                         |                                                                         |         |
|---------------------------------------------------------------------|------------------------------------------|--------------------------------------|-------------------------|---------|------------------------------------------|---------------------------------------------------------------------|-------------------------|---------|-----------------------------------------------------------------------|-------------------------------------------------------------------------|------------------------|---------|---------------------------------------------------------------------------|-------------------------|-------------------------------------------------------------------------|---------|
|                                                                     | ML-K <sub>3</sub> (K-mean)               |                                      |                         |         | ML-S <sub>3</sub> (Spectral)             |                                                                     |                         |         | EX-A <sub>3</sub> (All Comorbidities)                                 |                                                                         |                        |         | EX-S <sub>3</sub> (Selected Comorbidities)                                |                         |                                                                         |         |
| Parameter                                                           | A<br>N = 99<br>(33.9%)                   | B<br>N = 87<br>(29.8%)               | C<br>N = 106<br>(36.3%) | P-value | A<br>N = 123<br>(42.9%)                  | B<br>N = 44<br>(15.3%)                                              | C<br>N = 120<br>(41.8%) | P-value | A<br>N = 65<br>(22.0%)                                                | B<br>N = 140<br>(47.3%)                                                 | C<br>N = 91<br>(30.7%) | P-value | A<br>N = 74<br>(25.0%)                                                    | B<br>N = 147<br>(49.7%) | C<br>N = 75<br>(25.3%)                                                  | P-value |
| Age; Mean (SD); Years                                               | 72 ± 13<br><a href="#">C (&lt;0.001)</a> | 68 ± 13<br><a href="#">C (0.016)</a> | 62 ± 17                 | <0.001  | 70 ± 14<br><a href="#">C (&lt;0.001)</a> | 70 ± 14<br><a href="#">C (0.020)</a>                                | 63 ± 17                 | <0.001  | 60 ± 18<br><a href="#">B (0.001)</a><br><a href="#">C (&lt;0.001)</a> | 68 ± 14                                                                 | 70 ± 14                | <0.001  | 59 ± 18<br><a href="#">B (&lt;0.001)</a><br><a href="#">C (&lt;0.001)</a> | 69 ± 13                 | 71 ± 13                                                                 | <0.001  |
| Sex; Female; N (%)                                                  | 36 (36.4)                                | 36 (41.4)                            | 34 (40.6)               | 0.75    | 46 (37.4)                                | 20 (45.5)                                                           | 48 (40.0)               | 0.64    | 29 (44.6)                                                             | 53 (37.9)                                                               | 35 (38.5)              | 0.63    | 31 (41.9)                                                                 | 53 (36.1)               | 33 (44.0)                                                               | 0.46    |
| Large Vessel Occlusion; N (%)                                       | 38 (40.4)                                | 36 (44.4)                            | 46 (49.5)               | 0.47    | 41 (35.3)                                | 22 (53.7)                                                           | 55 (53.4)               | 0.01    | 26 (48.1)                                                             | 50 (39.4)                                                               | 43 (50.0)              | 0.26    | 31 (49.2)                                                                 | 52 (39.1)               | 36 (50.7)                                                               | 0.20    |
| Intravenous Thrombolysis; N (%)                                     | 10 (10.1)                                | 15 (17.2)                            | 14 (13.2)               | 0.36    | 10 (8.1)                                 | 12 (27.3)                                                           | 15 (12.5)               | 0.01    | 6 (9.2)                                                               | 14 (10.0)                                                               | 19 (20.9)              | 0.03    | 7 (9.5)                                                                   | 17 (11.6)               | 15 (20.0)                                                               | 0.12    |
| Mechanical Thrombectomy; N (%)                                      | 6 (6.1)                                  | 8 (9.2)                              | 10 (9.4)                | 0.63    | 7 (5.7)                                  | 4 (9.1)                                                             | 13 (10.8)               | 0.34    | 5 (7.7)                                                               | 9 (6.4)                                                                 | 10 (11.0)              | 0.46    | 6 (8.1)                                                                   | 9 (6.1)                 | 9 (12.0)                                                                | 0.32    |
| National Institutes of Health Stroke Scale (NIHSS) Score; Mean (SD) | 8 [4-16]                                 | 12 [6-18]                            | 10 [5-19]               | 0.28    | 8 [4-16]                                 | 13 [7-20]                                                           | 11 [5-19]               | 0.024   | 8 [4-22]                                                              | 9 [4-16]                                                                | 12 [6-20]              | 0.179   | 9 [4-22]                                                                  | 8 [4-16]                | 12 [6-19]                                                               | 0.214   |
| Imaging Patterns                                                    |                                          |                                      |                         |         |                                          |                                                                     |                         |         |                                                                       |                                                                         |                        |         |                                                                           |                         |                                                                         |         |
| Embolic/Large Vessel athero-Thromboembolism; N (%)                  | 75 (81.5)                                | 59 (77.6)                            | 71 (82.6)               | 0.49    | 81 (73.6)                                | 35 (85.4)                                                           | 83 (84.7)               | 0.22    | 41 (82.0)                                                             | 97 (79.5)                                                               | 67 (80.7)              | 0.31    | 47 (79.7)                                                                 | 102 (80.3)              | 56 (81.2)                                                               | 0.72    |
| Lacune; N (%)                                                       | 9 (9.8)                                  | 6 (7.9)                              | 10 (11.6)               |         | 12 (10.9)                                | 4 (9.8)                                                             | 10 (10.2)               |         | 4 (8.0)                                                               | 17 (13.9)                                                               | 5 (6.0)                |         | 7 (11.9)                                                                  | 14 (11.0)               | 5 (7.2)                                                                 |         |
| Border-zone; N (%)                                                  | 8 (8.7)                                  | 10 (13.2)                            | 5 (5.8)                 |         | 16 (14.5)                                | 2 (4.9)                                                             | 5 (5.1)                 |         | 5 (10.0)                                                              | 8 (6.6)                                                                 | 10 (12.0)              |         | 5 (8.5)                                                                   | 11 (8.7)                | 7 (10.1)                                                                |         |
| Vasculitis Pattern; N (%)                                           | 0.0 (0.0)                                | 1 (1.3)                              | 0.0 (0.0)               |         | 1 (0.9)                                  | 0.0 (0.0)                                                           | 0.0 (0.0)               |         | 0.0 (0.0)                                                             | 0.0 (0.0)                                                               | 0.0 (0.0)              |         | 1 (1.2)                                                                   | 0.0 (0.0)               | 0.0 (0.0)                                                               |         |
| TOAST                                                               |                                          |                                      |                         |         |                                          |                                                                     |                         |         |                                                                       |                                                                         |                        |         |                                                                           |                         |                                                                         |         |
| Large-Artery Atherosclerosis; N (%)                                 | 14 (23.7)                                | 19 (40.4)                            | 23 (36.5)               | 0.08    | 23 (30.7)                                | 6 (24.0)                                                            | 27 (38.6)               | 0.003   | 16 (43.2)                                                             | 21 (26.9)                                                               | 19 (34.5)              | <0.001  | 19 (43.2)                                                                 | 21 (26.6)               | 16 (34.0)                                                               | <0.001  |
| Cardio-embolism; N (%)                                              | 20 (33.9)                                | 15 (31.9)                            | 11 (17.5)               |         | 17 (22.7)                                | 15 (60.0)<br><a href="#">A (0.002)</a><br><a href="#">C (0.001)</a> | 14 (20.0)               |         | 5 (13.5)                                                              | 13 (16.7)<br><a href="#">A (0.001)</a><br><a href="#">B (&lt;0.001)</a> | 28 (50.9)              |         | 5 (11.4)                                                                  | 18 (22.8)               | 23 (48.9)<br><a href="#">A (&lt;0.001)</a><br><a href="#">B (0.007)</a> |         |
| Small-Vessel Occlusion; N (%)                                       | 5 (8.5)                                  | 4 (8.5)                              | 7 (11.1)                |         | 8 (10.7)                                 | 2 (8.0)                                                             | 7 (10.0)                |         | 1 (2.7)                                                               | 12 (15.4)                                                               | 4 (7.3)                |         | 4 (9.1)                                                                   | 9 (11.4)                | 4 (8.5)                                                                 |         |

| Model                                                  | Machine Learning           |                        |                         |         |                              |                        |                         |         | Expert Opinion                        |                         |                        |         |                                            |                         |                        |         |
|--------------------------------------------------------|----------------------------|------------------------|-------------------------|---------|------------------------------|------------------------|-------------------------|---------|---------------------------------------|-------------------------|------------------------|---------|--------------------------------------------|-------------------------|------------------------|---------|
|                                                        | ML-K <sub>3</sub> (K-mean) |                        |                         |         | ML-S <sub>3</sub> (Spectral) |                        |                         |         | EX-A <sub>3</sub> (All Comorbidities) |                         |                        |         | EX-S <sub>3</sub> (Selected Comorbidities) |                         |                        |         |
| Parameter                                              | A<br>N = 99<br>(33.9%)     | B<br>N = 87<br>(29.8%) | C<br>N = 106<br>(36.3%) | P-value | A<br>N = 123<br>(42.9%)      | B<br>N = 44<br>(15.3%) | C<br>N = 120<br>(41.8%) | P-value | A<br>N = 65<br>(22.0%)                | B<br>N = 140<br>(47.3%) | C<br>N = 91<br>(30.7%) | P-value | A<br>N = 74<br>(25.0%)                     | B<br>N = 147<br>(49.7%) | C<br>N = 75<br>(25.3%) | P-value |
| Stroke of Other Determined Etiology; N (%)             | 3 (5.1)                    | 1 (2.1)                | 9 (14.3)                | 0.28    | 4 (5.3)                      | 0.0 (0.0)              | 9 (12.9)                | 0.37    | 6 (16.2)                              | 7 (9.0)<br>C (0.002)    | 0.0 (0.0)              | 0.19    | 7 (15.9)                                   | 6 (7.6)<br>C (0.009)    | 0.0 (0.0)              | 0.27    |
| Stroke of Undetermined Etiology; N (%)                 | 17 (28.8)                  | 8 (17.0)               | 13 (20.6)               |         | 23 (30.7)                    | 2 (8.0)                | 13 (18.6)               |         | 9 (24.3)                              | 25 (32.1)               | 4 (7.3)                |         | 9 (20.5)                                   | 25 (31.6)               | 4 (8.5)                |         |
| Interval Between Onset to Index Event; Mean (SD); Days | 5.0 ± 6.0                  | 5.0 ± 7.0              | 7.0 ± 7.0               | 0.28    | 5.0 ± 6.0                    | 6.0 ± 8.0              | 6.0 ± 7.0               | 0.37    | 7.0 ± 8.0                             | 5.0 ± 6.0               | 5.0 ± 7.0              | 0.19    | 7.0 ± 7.0                                  | 5.0 ± 6.0               | 6.0 ± 7.0              | 0.27    |
| Mechanical Ventilation; N (%)                          | 25 (25.3)                  | 24 (27.6)              | 34 (32.1)               | 0.55    | 31 (25.2)                    | 13 (25.9)              | 39 (32.5)               | 0.27    | 22 (33.8)                             | 38 (27.1)               | 25 (27.5)              | 0.39    | 27 (36.5)                                  | 37 (25.2)               | 21 (28.0)              | 0.16    |
| Disposition*                                           |                            |                        |                         |         |                              |                        |                         |         |                                       |                         |                        |         |                                            |                         |                        |         |
| Discharged Home; N (%)                                 | 37 (37.8)                  | 38 (43.7)              | 50 (48.5)               | 0.57    | 51 (41.8)                    | 17 (38.6)              | 56 (47.1)               | 0.27    | 31 (50.8)                             | 60 (43.2)               | 36 (39.6)              | 0.39    | 38 (54.3)                                  | 61 (41.8)               | 29 (37.3)              | 0.16    |
| In Hospital Mortality; N (%)                           | 27 (27.6)                  | 25 (28.7)              | 24 (23.3)               |         | 30 (24.6)                    | 17 (38.6)              | 27 (22.7)               |         | 14 (23.0)                             | 33 (23.7)               | 30 (33.0)              |         | 14 (20.0)                                  | 37 (25.3)               | 36 (34.7)              |         |
| Still in Hospital/Subacute Care; N (%)                 | 34 (34.7)                  | 24 (27.6)              | 29 (28.2)               |         | 41 (33.6)                    | 10 (22.7)              | 36 (30.3)               |         | 16 (26.2)                             | 46 (33.1)               | 25 (27.5)              |         | 18 (25.7)                                  | 48 (32.9)               | 21 (28.0)              |         |
| Length of Hospital Stay; Mean (SD); Days               | 10.0 ± 8.0                 | 12.0 ± 9.0             | 14.0 ± 15.0             | 0.11    | 12.0 ± 9.0                   | 10.0 ± 7.0             | 13.0 ± 15.0             | 0.56    | 14.0 ± 15.0                           | 12.0 ± 12.0             | 10.0 ± 8.0             | 0.28    | 16.0 ± 17.0<br>B (0.036)                   | 11.0 ± 9.0              | 11.0 ± 8.0             | 0.03    |

\* Data on patients' disposition were sparse.

# **Results**

## **Intraparenchymal Hemorrhage; Comparing the Patients among the Comorbidities' Subgroups**

**Supplemental Tables 20-21**

**Supplemental Table 20. Dividing the IPH patients into 2 subgroups.** Baseline characteristics and laboratory findings among SARS-CoV-2 patients with a hemorrhagic stroke, when grouping the patients into 2 subgroups using machine learning (ML) and expert opinion (EX) models. ML-K<sub>2</sub> used hierarchal clustering and K-means, while ML-S<sub>2</sub> used spectral clustering, to separate patients into 2 subgroups. EX-A<sub>2</sub> used all 11 collected comorbidities and EX-S<sub>2</sub> used 8 selected comorbidities, to separate patients into 2 subgroups.

| Model                                                                  | Machine Learning       |                        |             |                        |                        |             | Expert Opinion            |                        |             |                                |                        |             |
|------------------------------------------------------------------------|------------------------|------------------------|-------------|------------------------|------------------------|-------------|---------------------------|------------------------|-------------|--------------------------------|------------------------|-------------|
|                                                                        | ML-K2 (K-mean)         |                        |             | ML-S2 (Spectral)       |                        |             | EX-A2 (All comorbidities) |                        |             | EX-S2 (Selected Comorbidities) |                        |             |
| Parameter                                                              | A<br>N = 40<br>(70.2%) | B<br>N = 17<br>(29.8%) | P-<br>value | A<br>N = 23<br>(34.3%) | B<br>N = 44<br>(65.7%) | P-<br>value | A<br>N = 38<br>(55.9%)    | B<br>N = 30<br>(44.1%) | P-<br>value | A<br>N = 39<br>(57.4%)         | B<br>N = 29<br>(42.6%) | P-<br>value |
| Age; Mean (SD); Years                                                  | 61 ± 19                | 63 ± 16                | 0.68        | 68 ± 16                | 61 ± 18                | 0.14        | 61 ± 18                   | 67 ± 15                | 0.15        | 61 ± 18                        | 67 ± 15                | 0.15        |
| Age; Median [IQR]; Years                                               | 65 [49 – 73]           | 65 [57 – 75]           | 0.89        | 69 [57 – 82]           | 65 [52 – 73]           | 0.26        | 65 [48 – 73]              | 67 [57 – 82]           | 0.46        | 65 [49 – 73]                   | 67 [57 – 82]           | 0.32        |
| Sex; Female; N (%)                                                     | 15 (37.5)              | 10 (58.8)              | 0.64        | 13 (56.5)              | 16 (36.4)              | 0.30        | 15 (39.5)                 | 15 (50.0)              | 0.30        | 16 (41.0)                      | 14 (48.3)              | 0.40        |
| National Institutes of Health Stroke Scale (NIHSS) Score; Median [IQR] | 14.0 [3.0 – 19.0]      | 15.0 [12.0 – 23.0]     | 1.00        | 0.0 [0.0 – 14.0]       | 15.0 [3.0 – 20.0]      | 0.36        | 7.0 [0.0 – 21.0]          | 13.0 ± [0.0 – 16.0]    | 0.50        | 8.0 [0.0 – 21.0]               | 12.0 [0.0 – 15.0]      | 0.76        |
| Intracerebral Hemorrhage (ICH) Score; Median [IQR]                     | 3.0 [2.0 – 3.0]        | 3.0 [2.0 – 4.0]        | 0.49        | 4.0 [3.0 – 5.0]        | 3.0 [2.0 – 3.0]        | 0.09        | 3.0 [2.0 – 4.0]           | 3.0 [1.0 – 4.0]        | 0.87        | 3.0 [2.0 – 4.0]                | 3.0 [2.0 – 4.0]        | 0.72        |
| Interval Between Onset to Index Event; Median [IQR]; Days              | 0.0 [0.0 – 7.0]        | 6.0 [0.0 – 12.0]       | 0.18        | 0.0 [0.0 – 10.0]       | 0.0 [0.0 – 8.0]        | 0.83        | 0.0 [0.0 – 11.0]          | 0.0 [0.0 – 7.0]        | 0.94        | 0.0 [0.0 – 11.0]               | 0.0 [0.0 – 8.0]        | 0.72        |
| Mechanical Ventilation Onset; Median [IQR]; Days                       | 2.0 [1.0 – 4.0]        | 1.0 [1.0 – 3.0]        | 1.00        | 2.0 [1.0 – 3.0]        | 2.0 [1.0 – 3.0]        | 1.00        | 1.0 [1.0 – 5.0]           | 2.0 [1.0 – 2.0]        | 0.70        | 1.0 [1.0 – 5.0]                | 2.0 [1.0 – 2.0]        | 0.70        |
| Disposition *                                                          |                        |                        |             |                        |                        |             |                           |                        |             |                                |                        |             |
| Discharged Home; N (%)                                                 | 8 (22.9)               | 2 (11.8)               |             | 1 (6.3)                | 9 (23.1)               |             | 7 (23.3)                  | 3 (11.5)               |             | 7 (22.6)                       | 3 (12.0)               |             |
| In Hospital Mortality; N (%)                                           | 20 (57.1)              | 11 (64.7)              | 0.64        | 12 (75.0)              | 22 (56.4)              | 0.30        | 16 (53.3)                 | 19 (73.1)              | 0.30        | 17 (54.8)                      | 18 (72.0)              | 0.40        |
| Still in Hospital/Subacute Care; N (%)                                 | 7 (20.0)               | 4 (23.5)               |             | 3 (18.8)               | 8 (20.5)               |             | 7 (23.3)                  | 4 (15.4)               |             | 7 (22.6)                       | 4 (16.0)               |             |
| Length of Hospital Stay; Median (IQR); Days                            | 8.0 [4.0 – 18.0]       | 5.0 [2.0 – 33.0]       | 0.79        | 5.0 [4.0 – 23.0]       | 8.0 [3.0 – 21.0]       | 0.75        | 7.0 [3.0 – 23.0]          | 7.0 [4.0 – 17.0]       | 0.94        | 7.0 [3.0 – 23.0]               | 6.0 [4.0 – 19.0]       | 0.84        |
| Laboratory Findings                                                    |                        |                        |             |                        |                        |             |                           |                        |             |                                |                        |             |
| White Blood Cell Count; Mean (SD); x10 <sup>9</sup> /L                 | 13.1 ± 12.9            | 10.1 ± 4.9             | 0.28        | 9.4 ± 4.6              | 12.8 ± 12.4            | 0.15        | 13.5 ± 13.4               | 9.4 ± 4.1              | 0.13        | 13.3 ± 13.2                    | 9.4 ± 4.2              | 0.15        |
| White Blood Cell Count; Median [IQR]; x10 <sup>9</sup> /L              | 10.1 [8.2 – 12.0]      | 8.6 [7.1 – 12.1]       | 0.05        | 8.6 [6.7 – 10.3]       | 10.0 [8.2 – 12.0]      | 0.11        | 10.1 [8.4 – 13.2]         | 8.6 [7.2 – 10.5]       | 0.03        | 10.0 [8.2 – 12.5]              | 8.7 [6.9 – 10.8]       | 0.06        |
| Neutrophil Count; Mean (SD); x10 <sup>9</sup> /L                       | 10.4 ± 12.0            | 7.9 ± 4.8              | 0.38        | 7.8 ± 4.5              | 10.1 ± 11.5            | 0.31        | 11.2 ± 12.5               | 7.3 ± 4.1              | 0.14        | 10.9 ± 12.3                    | 7.4 ± 4.2              | 0.17        |
| Neutrophil Count; Median [IQR]; x10 <sup>9</sup> /L                    | 7.6 [5.5 – 9.8]        | 5.6 [4.7 – 9.7]        | 0.04        | 6.9 [4.7 – 9.4]        | 7.6 [5.4 – 10.3]       | 0.39        | 8.0 [6.8 – 12.2]          | 6.3 [4.7 – 9.0]        | 0.02        | 7.6 [5.6 – 12.2]               | 6.5 [4.8 – 9.7]        | 0.04        |
| Lymphocyte Count; Mean (SD); x10 <sup>9</sup> /L                       | 2.1 ± 2.3              | 1.6 ± 0.7              | 0.36        | 1.3 ± 0.7              | 2.0 ± 2.2              | 0.11        | 2.0 ± 2.4                 | 1.5 ± 0.7              | 0.30        | 2.0 ± 2.3                      | 1.4 ± 0.7              | 0.24        |
| Lymphocyte; Median [IQR]; x10 <sup>9</sup> /L                          | 1.3 [0.9 – 2.2]        | 1.7 [1.1 – 2.1]        | 0.35        | 1.0 [0.8 – 1.8]        | 1.4 [1.0 – 2.2]        | 0.87        | 1.2 [0.7 – 1.9]           | 1.4 [0.8 – 2.1]        | 0.79        | 1.2 [0.7 – 2.0]                | 1.4 [0.8 – 2.0]        | 1.00        |
| Platelet Count; Mean (SD); x10 <sup>9</sup> /L                         | 198.4 ± 104.5          | 195.4 ± 102.2          | 0.93        | 204.4 ± 87.0           | 192.5 ± 105.1          | 0.65        | 198.2 ± 111.1             | 199.9 ± 84.1           | 0.95        | 195.9 ± 110.0                  | 202.5 ± 84.6           | 0.80        |

| Model                                             | Machine Learning        |                         |         |                          |                         |         | Expert Opinion            |                         |         |                                |                         |         |
|---------------------------------------------------|-------------------------|-------------------------|---------|--------------------------|-------------------------|---------|---------------------------|-------------------------|---------|--------------------------------|-------------------------|---------|
|                                                   | ML-K2 (K-mean)          |                         |         | ML-S2 (Spectral)         |                         |         | EX-A2 (All comorbidities) |                         |         | EX-S2 (Selected Comorbidities) |                         |         |
| Parameter                                         | A<br>N = 40<br>(70.2%)  | B<br>N = 17<br>(29.8%)  | P-value | A<br>N = 23<br>(34.3%)   | B<br>N = 44<br>(65.7%)  | P-value | A<br>N = 38<br>(55.9%)    | B<br>N = 30<br>(44.1%)  | P-value | A<br>N = 39<br>(57.4%)         | B<br>N = 29<br>(42.6%)  | P-value |
| Platelet Count; Median [IQR]; x10 <sup>9</sup> /L | 172.0 [131.0 – 255.0]   | 178.0 [133.0 – 258.5]   | 0.76    | 178.5 [145.0 – 257.0]    | 174.0 [131.0 – 237.0]   | 0.87    | 168.5 [113.0 – 255.0]     | 182.0 [147.0 – 253.5]   | 0.79    | 167.0 [115.0 – 255.0]          | 184.0 [149.0 – 257.0]   | 0.59    |
| Alanine Transaminase (ALT); Mean (SD); U/L        | 55.9 ± 73.7             | 36.2 ± 38.8             | 0.26    | 23.9 ± 24.9              | 57.1 ± 71.7             | 0.07    | 45.7 ± 72.1               | 43.5 ± 46.8             | 0.89    | 45.7 ± 72.1                    | 43.5 ± 46.8             | 0.89    |
| Alanine Transaminase (ALT); Median [IQR]; U/L     | 22.9 [8.0 – 81.0]       | 17.5 [6.2 – 56.2]       | 0.99    | 16.7 [6.4 – 33.8]        | 27.0 [8.1 – 81.2]       | 0.27    | 20.1 [6.2 – 55.0]         | 17.5 [7.0 – 69.3]       | 0.57    | 20.1 [6.2 – 55.0]              | 17.5 [7.0 – 69.3]       | 0.57    |
| Aspartate Transaminase (AST); Mean (SD); U/L      | 33.7 ± 27.2             | 33.1 ± 19.9             | 0.93    | 31.4 ± 17.3              | 34.2 ± 26.5             | 0.20    | 28.5 ± 19.9               | 37.4 ± 25.1             | 0.16    | 29.2 ± 19.9                    | 37.0 ± 25.5             | 0.22    |
| Aspartate Transaminase (AST); Median [IQR]; U/L   | 26.0 [18.2 – 42.0]      | 27.6 [17.0 – 41.5]      | 0.84    | 27.1 [20.0 – 40.0]       | 27.5 [17.6 – 43.2]      | 0.91    | 23.0 [18.2 – 35.0]        | 33.0 [18.0 – 48.0]      | 0.17    | 24.0 [18.6 – 37.5]             | 32.5 [18.0 – 43.4]      | 0.28    |
| Blood Urea Nitrogen (BUN); Mean (SD); mg/dl       | 84.1 ± 226.1            | 47.1 ± 45.6             | 0.40    | 140.8 ± 441.9            | 82.3 ± 215.1            | 0.57    | 93.3 ± 229.3              | 117.2 ± 399.8           | 0.79    | 91.2 ± 225.4                   | 120.4 ± 407.4           | 0.75    |
| Blood Urea Nitrogen (BUN); Median [IQR]; mg/dl    | 26.0 [18.2 – 42.0]      | 27.6 [17.0 – 41.5]      | 0.30    | 35.0 [23.0 – 54.0]       | 29.5 [18.5 – 51.0]      | 0.47    | 31.5 [19.5 – 53.0]        | 33.0 [20.0 – 49.0]      | 0.89    | 33.0 [20.0 – 52.0]             | 33.5 [20.0 – 49.0]      | 0.91    |
| Creatinine; Mean (SD); mg/dl                      | 1.9 ± 2.3               | 2.3 ± 2.0               | 0.54    | 2.7 ± 2.6                | 1.8 ± 2.2               | 0.19    | 1.5 ± 1.7                 | 2.7 ± 2.8               | 0.05    | 1.5 ± 1.7                      | 2.8 ± 2.8               | 0.04    |
| Creatinine; Median [IQR]; mg/dl                   | 1.0 [0.8 – 1.3]         | 1.3 [1.1 – 3.1]         | 0.17    | 1.4 [1.0 – 4.3]          | 1.0 [0.8 – 1.3]         | 0.09    | 1.0 [0.8 – 1.3]           | 1.3 [1.0 – 4.1]         | 0.06    | 1.0 [0.8 – 1.2]                | 1.3 [1.1 – 4.3]         | 0.03    |
| C-Reactive Protein (CRP); Mean (SD); mg/L         | 95.0 ± 272.0            | 63.0 ± 76.0             | 0.56    | 57.0 ± 69.0              | 92.0 ± 259.0            | 0.46    | 102.0 ± 276.0             | 51.0 ± 62.0             | 0.35    | 99.0 ± 271.0                   | 52.0 ± 63.0             | 0.37    |
| C-Reactive Protein (CRP); Median [IQR]; mg/L      | 32.0 [21.0 – 46.0]      | 39.0 [28.0 – 68.0]      | 0.30    | 38.0 [28.0 – 45.0]       | 33.0 [21.0 – 56.0]      | 0.50    | 36.0 [22.0 – 56.0]        | 36.0 [25.0 – 46.0]      | 0.79    | 35.0 [20.0 – 52.0]             | 33.5 [20.0 – 49.0]      | 1.00    |
| Lactate Dehydrogenase (LDH); Mean (SD); U/L       | 341.0 ± 209.1           | 628.9 ± 758.7           | 0.25    | 417.8 ± 193.2            | 486.8 ± 612.3           | 0.65    | 357.7 ± 221.5             | 572.0 ± 656.6           | 0.24    | 357.7 ± 221.5                  | 572.0 ± 656.6           | 0.24    |
| Lactate Dehydrogenase (LDH); Median [IQR]; U/L    | 330.0 [164.0 – 457.0]   | 357.0 [284.0 – 580.0]   | 1.00    | 366.5 [284.0 – 560.0]    | 402.0 [164.0 – 579.0]   | 0.84    | 333.0 [164.0 – 507.0]     | 376.0 [284.0 – 484.0]   | 1.00    | 330.0 [164.0 – 507.0]          | 376.0 [284.0 – 580.0]   | 1.00    |
| Fibrinogen; Mean (SD); mg/dl                      | 747.0 ± 386.9           | 349.5 ± 190.2           | 0.17    | 651.7 ± 540.4            | 747.0 ± 386.9           | 0.81    | 848.8 ± 405.1             | 349.5 ± 190.2           | 0.09    | 848.8 ± 405.1                  | 349.5 ± 190.2           | 0.09    |
| Fibrinogen; Median [IQR]; mg/dl                   | 719.5 [498.0 – 996.0]   | 349.5 [215.0 – 484.0]   | 0.40    | 484.0 [215.0 – 1256.0]   | 719.5 [498.0 – 996.0]   | 1.00    | 746.0 [693.0 – 1246.0]    | 349.5 [215.0 – 484.0]   | 0.43    | 746.0 [693.0 – 1246.0]         | 349.5 [215.0 – 484.0]   | 0.43    |
| D- Dimer; Mean (SD); ng/ml                        | 1882.9 ± 2216.0         | 4578.3 ± 4646.4         | 0.42    | 16670.9 ± 22877.3        | 1882.9 ± 2216.0         | 0.09    | 11967.3 ± 20130.3         | 3170.2 ± 3375.2         | 0.31    | 11065.7 ± 19329.9              | 3394.2 ± 3723.4         | 0.23    |
| D- Dimer; Median [IQR]; ng/ml                     | 1253.0 [391.5 – 2387.0] | 3120.0 [836.0 – 9779.0] | 0.55    | 3120.0 [836.0 – 49725.0] | 1253.0 [391.5 – 2387.5] | 0.13    | 2371.0 [483.0 – 6935.0]   | 2303.0 [836.0 – 3120.0] | 1.00    | 2050.0 [483.0 – 6935.0]        | 2556.0 [836.0 – 3120.0] | 1.00    |

\* Data on patients' disposition were sparse.

**Supplemental Table 21. Dividing the IPH patients to 3 subgroups.** Baseline characteristics and laboratory findings among SARS-CoV-2 patients with intraparenchymal hemorrhage when clustering of patients into 3 subgroups using machine learning (ML) and expert opinion (EX) models. ML-K<sub>3</sub> used hierarchal clustering and K-means, while ML-S<sub>3</sub> used spectral clustering, to separate patients into 3 subgroups. EX-A<sub>3</sub> used all 11 collected comorbidities and EX-S<sub>3</sub> used 8 selected comorbidities, to separate patients into 3 subgroups. Blue ink indicates the post-hoc p values.

| Model                                                                  | Machine Learning           |                        |                        |             |                               |                        |                        |            | Expert Opinion                        |                              |                        |             |                                            |                        |                        |             |
|------------------------------------------------------------------------|----------------------------|------------------------|------------------------|-------------|-------------------------------|------------------------|------------------------|------------|---------------------------------------|------------------------------|------------------------|-------------|--------------------------------------------|------------------------|------------------------|-------------|
|                                                                        | ML-K <sub>3</sub> (K-mean) |                        |                        |             | ML-S <sub>3</sub> (Spectral)  |                        |                        |            | EX-A <sub>3</sub> (All Comorbidities) |                              |                        |             | EX-S <sub>3</sub> (Selected Comorbidities) |                        |                        |             |
| Parameter                                                              | A<br>N = 23<br>(40.4%)     | B<br>N = 19<br>(33.3%) | C<br>N = 15<br>(26.3%) | P-<br>value | A<br>N = 20<br>(29.9%)        | B<br>N = 28<br>(41.8%) | C<br>N = 19<br>(28.4%) | P<br>value | A<br>N = 19<br>(27.9%)                | B<br>N = 31<br>(45.6%)       | C<br>N = 18<br>(26.5%) | P-<br>value | A<br>N = 21<br>(30.9%)                     | B<br>N = 33<br>(48.5%) | C<br>N = 14<br>(20.6%) | P-<br>value |
| Age; Mean (SD); Years                                                  | 67 ± 13<br>B (0.03)        | 53 ± 21                | 64 ± 17                | 0.03        | 72 ± 14<br>C (0.005)          | 66 ± 14                | 49 ± 21                | 0.01       | 55 ± 19<br>B (0.019)                  | 69 ± 15                      | 64 ± 17                | 0.03        | 53 ± 19<br>B (0.001)                       | 70 ± 13                | 63 ± 17                | 0.002       |
| Age; Median [IQR]; Years                                               | 67 [59 – 78]               | 49 [45 – 68]           | 66 [51 – 82]           | 0.28        | 72 [63 – 83]                  | 66 [57 – 74]           | 49 [45 – 68]           | 0.10       | 56 [47 – 68]                          | 68 [60 – 78]                 | 65 [52 – 82]           | 0.11        | 56 [45 – 68]                               | 68 [65 – 78]           | 65 [51 – 82]           | 0.04        |
| Sex; Female; N (%)                                                     | 7 (30.4)                   | 9 (47.4)               | 9 (60.0)               | 0.19        | 10 (50.0)                     | 10 (35.7)              | 9 (47.4)               | 0.56       | 9 (47.4)                              | 11 (35.5)                    | 10 (55.6)              | 0.37        | 9 (42.9)                                   | 12 (36.4)              | 9 (64.3)               | 0.21        |
| National Institutes of Health Stroke Scale (NIHSS) Score; Median [IQR] | 16.0 [8.0 – 21.0]          | 6.0 [0.0 – 17.0]       | 15.0 [12.0 – 23.0]     | 0.17        | 0.0 [0.0 – 10.0]<br>B (0.009) | 16.0 [12.0 – 22.0]     | 6.0 [0.0 – 17.0]       | 0.03       | 1.0 [0.0 – 14.0]                      | 5.0 [0.0 – 20.0]             | 15.0 [12.0 – 15.0]     | 0.09        | 1.0 [0.0 – 14.0]                           | 8.0 [0.0 – 19.0]       | 15.0 [12.0 – 23.0]     | 0.11        |
| Intracerebral Hemorrhage (ICH) Score; Median [IQR]                     | 3.0 [2.0 – 3.0]            | 2.0 [2.0 – 4.0]        | 3.0 [3.0 – 4.0]        | 0.21        | 4.0 [3.0 – 5.0]               | 3.0 [2.0 – 3.0]        | 2.0 [2.0 – 4.0]        | 0.10       | 4.0 [2.0 – 5.0]<br>B (0.010)          | 3.0 [2.0 – 3.0]<br>C (0.026) | 3.0 [2.0 – 4.0]        | 0.02        | 4.0 [2.0 – 4.0]<br>B (0.019)               | 3.0 [2.0 – 3.0]        | 3.0 [2.0 – 5.0]        | 0.02        |
| Interval Between Onset to Index Event; Median [IQR]; Days              | 0.0 [0.0 – 4.0]            | 1.0 [0.0 – 12.0]       | 6.0 [0.0 – 11.0]       | 0.31        | 0.0 [0.0 – 7.0]               | 0.0 [0.0 – 8.0]        | 1.0 [0.0 – 12.0]       | 0.88       | 0.0 [0.0 – 11.0]                      | 0.0 [0.0 – 10.0]             | 4.0 [0.0 – 8.0]        | 0.81        | 0.0 [0.0 – 11.0]                           | 0.0 [0.0 – 6.0]        | 5.0 [0.0 – 10.0]       | 0.61        |
| Mechanical Ventilation Onset; Median [IQR]; Days                       | 2.0 [1.0 – 2.0]            | 4.0 [1.0 – 5.0]        | 1.0 [1.0 – 2.0]        | 0.05        | 2.0 [1.0 – 2.0]               | 1.0 [1.0 – 2.0]        | 4.0 [1.0 – 5.0]        | 0.05       | 1.0 [1.0 – 4.0]                       | 2.0 [1.0 – 4.0]              | 2.0 [1.0 – 2.0]        | 0.51        | 3.0 [1.0 – 5.0]                            | 2.0 [1.0 – 2.0]        | 1.0 [1.0 – 2.0]        | 0.90        |
| Disposition *                                                          |                            |                        |                        |             |                               |                        |                        |            |                                       |                              |                        |             |                                            |                        |                        |             |
| Discharged Home; N (%)                                                 | 6 (26.1)                   | 2 (14.3)               | 2 (13.3)               | 0.15        | 1 (7.7)                       | 7 (25.0)               | 2 (14.3)               | 0.07       | 2 (16.7)                              | 7 (25.9)                     | 1 (5.9)                | 0.32        | 2 (14.3)                                   | 7 (25.0)               | 1 (7.1)                | 0.25        |
| In Hospital Mortality; N (%)                                           | 15 (8.7)                   | 6 (42.9)               | 10 (66.7)              |             | 9 (62.9)                      | 19 (67.9)              | 6 (42.9)               |            | 6 (50.0)                              | 16 (59.3)                    | 13 (76.5)              |             | 7 (50.0)                                   | 18 (64.3)              | 10 (71.4)              |             |
| Still in Hospital/Suba-cute Care; N (%)                                | 2 (8.7)                    | 6 (42.9)               | 3 (20.0)               |             | 3 (23.1)                      | 2 (7.1)                | 6 (42.9)               |            | 4 (33.3)                              | 4 (14.8)                     | 3 (17.6)               |             | 5 (35.7)                                   | 3 (10.7)               | 3 (21.4)               |             |
| Length of Hospital Stay; Median [IQR]; Days                            | 8.0 [3.0 – 19.0]           | 7.0 [5.0 – 24.0]       | 5.0 [3.0 – 29.0]       | 0.80        | 7.0 [4.0 – 29.0]              | 5.0 [3.0 – 17.0]       | 7.0 [5.0 – 24.0]       | 0.94       | 6.0 [6.0 – 18.0]                      | 7.0 [3.0 – 21.0]             | 7.0 [2.0 – 29.0]       | 0.95        | 6.0 [4.0 – 23.0]                           | 9.0 [4.0 – 19.0]       | 5.0 [2.0 – 31.0]       | 0.49        |

| Model                                                          | Machine Learning           |                        |                        |             |                                 |                                 |                        |            | Expert Opinion                        |                        |                        |             |                                            |                        |                        |             |
|----------------------------------------------------------------|----------------------------|------------------------|------------------------|-------------|---------------------------------|---------------------------------|------------------------|------------|---------------------------------------|------------------------|------------------------|-------------|--------------------------------------------|------------------------|------------------------|-------------|
|                                                                | ML-K <sub>3</sub> (K-mean) |                        |                        |             | ML-S <sub>3</sub> (Spectral)    |                                 |                        |            | EX-A <sub>3</sub> (All Comorbidities) |                        |                        |             | EX-S <sub>3</sub> (Selected Comorbidities) |                        |                        |             |
| Parameter                                                      | A<br>N = 23<br>(40.4%)     | B<br>N = 19<br>(33.3%) | C<br>N = 15<br>(26.3%) | P-<br>value | A<br>N = 20<br>(29.9%)          | B<br>N = 28<br>(41.8%)          | C<br>N = 19<br>(28.4%) | P<br>value | A<br>N = 19<br>(27.9%)                | B<br>N = 31<br>(45.6%) | C<br>N = 18<br>(26.5%) | P-<br>value | A<br>N = 21<br>(30.9%)                     | B<br>N = 33<br>(48.5%) | C<br>N = 14<br>(20.6%) | P-<br>value |
| <b>Laboratory Findings</b>                                     |                            |                        |                        |             |                                 |                                 |                        |            |                                       |                        |                        |             |                                            |                        |                        |             |
| <b>White Blood Cell Count; Mean (SD); x10<sup>9</sup>/L</b>    | 14.5 ± 16.5                | 11.0 ± 5.6             | 10.2 ± 5.0             | 0.50        | 8.4 ± 3.2                       | 10.9 ± 14.7                     | 9.5 ± 5.6              | 0.17       | 11.2 ± 6.3                            | 12.7 ± 13.5            | 9.6 ± 4.7              | 0.63        | 10.9 ± 5.9                                 | 12.3 ± 13.2            | 10.1 ± 5.2             | 0.79        |
| <b>White Blood Cell Count; Median [IQR]; x10<sup>9</sup>/L</b> | 10.8 [8.2 – 12.0]          | 9.5 [8.2 – 12.0]       | 8.4 [6.7 – 15.1]       | 0.10        | 8.4 [6.7 – 9.8]                 | 10.9 [7.7 – 15.1]               | 9.5 [8.2 – 12.0]       | 0.06       | 10.3 [8.2 – 13.8]                     | 9.3 [8.1 – 11.6]       | 8.7 [6.7 – 9.8]        | 0.16        | 10.0 [8.2 – 13.8]                          | 9.3 [7.9 – 11.5]       | 8.4 [6.7 – 9.1]        | 0.11        |
| <b>Neutrophil Count; Mean (SD); x10<sup>9</sup>/L</b>          | 11.2 ± 15.1                | 8.9 ± 5.7              | 8.0 ± 4.9              | 0.66        | 6.7 ± 3.4                       | 8.4 ± 12.4                      | 7.2 ± 5.7              | 0.37       | 10.1 ± 5.9                            | 9.9 ± 12.5             | 7.6 ± 4.7              | 0.68        | 9.7 ± 5.5                                  | 9.6 ± 12.1             | 7.9 ± 5.1              | 0.85        |
| <b>Neutrophil Count; Median [IQR]; x10<sup>9</sup>/L</b>       | 8.3 [5.5 – 9.8]            | 7.2 [5.3 – 9.4]        | 5.8 [4.6 – 12.2]       | 0.09        | 6.7 [4.7 – 7.2]                 | 8.4 [5.5 – 12.2]                | 7.2 [5.3 – 9.4]        | 0.32       | 8.7 [5.6 – 12.8]                      | 7.2 [5.5 – 9.7]        | 6.3 [4.6 – 8.5]        | 0.17        | 7.5 [6.8 – 12.2]                           | 7.2 [5.3 – 9.7]        | 5.5 [4.6 – 7.1]        | 0.06        |
| <b>Lymphocyte Count; Mean (SD); x10<sup>9</sup>/L</b>          | 2.5 ± 2.9                  | 1.5 ± 0.8              | 1.6 ± 0.7              | 0.21        | 1.0 ± 0.7                       | 1.5 ± 2.5                       | 1.3 ± 0.8              | 1.0        | 1.3 ± 0.8                             | 2.0 ± 2.4              | 1.6 ± 0.7              | 0.44        | 1.3 ± 0.8                                  | 2.0 ± 2.4              | 1.6 ± 0.7              | 0.47        |
| <b>Lymphocyte; Median [IQR]; x10<sup>9</sup>/L</b>             | 1.4 [1.0 – 2.3]            | 1.3 [0.9 – 2.0]        | 1.7 [1.1 – 2.0]        | 0.62        | 1.0 [0.7 – 1.7]                 | 1.5 [1.0 – 2.2]                 | 1.3 [0.9 – 2.0]        | 0.73       | 1.2 [0.7 – 1.5]                       | 1.0 [0.9 – 2.0]        | 1.7 [1.1 – 2.1]        | 0.34        | 1.2 [0.7 – 1.9]                            | 1.0 [0.8 – 2.2]        | 1.7 [1.1 – 2.0]        | 0.28        |
| <b>Platelet Count; Mean (SD); x10<sup>9</sup>/L</b>            | 198.7 ± 119.9              | 198.9 ± 81.9           | 194.3 ± 105.7          | 0.99        | 193.0 ± 90.3                    | 165.5 ± 113.5                   | 190.0 ± 81.9           | 0.61       | 215.8 ± 89.4                          | 182.2 ± 106.8          | 212.2 ± 89.7           | 0.49        | 202.4 ± 91.6                               | 192.4 ± 102.9          | 209.6 ± 99.0           | 0.87        |
| <b>Platelet Count; Median [IQR]; x10<sup>9</sup>/L</b>         | 174.0 [115.0 – 237.0]      | 190.0 [151.0 – 255.0]  | 176.0 [133.0 – 272.0]  | 0.94        | 193.0 [150.0 – 272.0]           | 165.5 [115.0 – 236.0]           | 190.0 [151.0 – 255.0]  | 0.90       | 219.0 [167.0 – 255.0]                 | 159.5 [115.0 – 237.0]  | 180.0 [145.0 – 272.0]  | 0.51        | 210.0 [151.0 – 255.0]                      | 180.5 [138.0 – 243.5]  | 176.0 [133.0 – 272.0]  | 0.93        |
| <b>Alanine Transaminase (ALT); Mean (SD); U/L</b>              | 72.0 ± 83.6                | 43.0 ± 59.8            | 29.0 ± 28.8            | 0.19        | 17.1 ± 24.3                     | 55.0 ± 75.9                     | 22.9 ± 59.8            | 0.20       | 33.1 ± 56.9                           | 58.1 ± 74.5            | 33.4 ± 35.6            | 0.37        | 34.8 ± 54.5                                | 57.8 ± 72.7            | 27.6 ± 30.1            | 0.31        |
| <b>Alanine Transaminase (ALT); Median [IQR]; U/L</b>           | 61.1 [12.0 – 99.0]         | 22.9 [6.2 – 45.0]      | 17.0 [6.2 – 54.1]      | 0.60        | 17.1 [7.0 – 33.8]               | 55.0 [12.0 – 81.0]              | 22.0 [6.2 – 45.0]      | 0.48       | 21.5 [3.8 – 31.5]                     | 19.0 [8.4 – 81.4]      | 12.0 [6.2 – 63.0]      | 0.61        | 21.5 [5.0 – 32.0]                          | 19.0 [12.0 – 81.0]     | 10.0 [5.0 – 54.1]      | 0.56        |
| <b>Aspartate Transaminase (AST); Mean (SD); U/L</b>            | 37.1 ± 28.2                | 27.8 ± 25.3            | 34.3 ± 20.0            | 0.60        | 24.7 ± 17.9                     | 35.1 ± 25.2                     | 22.0 ± 25.3            | 0.31       | 28.6 ± 26.1                           | 36.2 ± 23.6            | 30.9 ± 19.6            | 0.59        | 29.1 ± 24.3                                | 35.5 ± 23.9            | 31.8 ± 20.2            | 0.70        |
| <b>Aspartate Transaminase (AST); Median [IQR]; U/L</b>         | 33.0 [22.0 – 46.0]         | 22.0 [15.0 – 26.0]     | 28.0 [18.0 – 43.0]     | 0.07        | 24.7 [18.0 – 40.0]<br>B (0.024) | 35.1 [25.0 – 48.0]<br>C (0.020) | 22.0 [15.0 – 26.0]     | 0.01       | 21.0 [15.6 – 31.1]                    | 32.0 [22.0 – 46.0]     | 27.6 [17.0 – 38.0]     | 0.17        | 22.0 [18.2 – 35.0]                         | 32.0 [20.0 – 46.0]     | 27.1 [18.0 – 36.0]     | 0.17        |

| Model                                                 | Machine Learning           |                        |                        |             |                              |                        |                        |            | Expert Opinion                        |                        |                        |             |                                            |                        |                        |             |
|-------------------------------------------------------|----------------------------|------------------------|------------------------|-------------|------------------------------|------------------------|------------------------|------------|---------------------------------------|------------------------|------------------------|-------------|--------------------------------------------|------------------------|------------------------|-------------|
|                                                       | ML-K <sub>3</sub> (K-mean) |                        |                        |             | ML-S <sub>3</sub> (Spectral) |                        |                        |            | EX-A <sub>3</sub> (All Comorbidities) |                        |                        |             | EX-S <sub>3</sub> (Selected Comorbidities) |                        |                        |             |
| Parameter                                             | A<br>N = 23<br>(40.4%)     | B<br>N = 19<br>(33.3%) | C<br>N = 15<br>(26.3%) | P-<br>value | A<br>N = 20<br>(29.9%)       | B<br>N = 28<br>(41.8%) | C<br>N = 19<br>(28.4%) | P<br>value | A<br>N = 19<br>(27.9%)                | B<br>N = 31<br>(45.6%) | C<br>N = 18<br>(26.5%) | P-<br>value | A<br>N = 21<br>(30.9%)                     | B<br>N = 33<br>(48.5%) | C<br>N = 14<br>(20.6%) | P-<br>value |
| <b>Blood Urea Nitrogen (BUN); Mean (SD); mg/dl</b>    | 33.6 ± 25.7                | 142.9 ± 320.2          | 43.7 ± 45.0            | 0.21        | 34.0 ± 475.2                 | 32.0 ± 23.1            | 31.0 ± 320.2           | 0.45       | 145.8 ± 333.1                         | 124.6 ± 406.1          | 40.2 ± 45.2            | 0.63        | 132.5 ± 310.5                              | 119.7 ± 398.9          | 43.0 ± 48.3            | 0.73        |
| <b>Blood Urea Nitrogen (BUN); Median [IQR]; mg/dl</b> | 25.0 [17.5 – 48.5]         | 31.0 [17.0 – 72.0]     | 34.0 [23.0 – 45.0]     | 0.45        | 34.0 [19.0 – 59.0]           | 32.0 [21.0 – 47.0]     | 31.0 [17.0 – 72.0]     | 0.79       | 29.0 [17.0 – 45.0]                    | 34.5 [22.0 – 59.0]     | 32.5 [12.5 – 44.5]     | 0.92        | 29.0 [17.0 – 54.0]                         | 33.0 [21.0 – 59.0]     | 38.0 [28.0 – 45.0]     | 0.99        |
| <b>Creatinine; Mean (SD); mg/dl</b>                   | 2.2 ± 2.7                  | 1.4 ± 1.6              | 2.3 ± 2.1              | 0.45        | 1.3 ± 2.5                    | 1.1 ± 2.7              | 1.0 ± 1.6              | 0.40       | 1.3 ± 1.7                             | 2.1 ± 2.3              | 2.8 ± 2.8              | 0.24        | 1.3 ± 1.6                                  | 2.3 ± 2.8              | 2.6 ± 2.1              | 0.27        |
| <b>Creatinine; Median [IQR]; mg/dl</b>                | 1.1 [1.0 – 1.4]            | 1.0 [0.8 – 1.2]        | 1.3 [1.0 – 4.3]        | 0.36        | 1.3 [1.0 – 2.0]              | 1.1 [1.0 – 3.7]        | 1.0 [0.8 – 1.2]        | 0.21       | 0.9 [0.7 – 1.0]                       | 1.1 [1.0 – 1.4]        | 1.4 [1.1 – 4.3]        | 0.08        | 0.9 [0.7 – 1.2]                            | 1.1 [1.0 – 1.7]        | 1.4 [1.1 – 4.3]        | 0.08        |
| <b>C-Reactive Protein (CRP); Mean (SD); mg/L</b>      | 35.0 ± 19.0                | 165.0 ± 386.0          | 59.0 ± 77.0            | 0.25        | 38.0 ± 74.0                  | 34.0 ± 21.0            | 33.0 ± 386.0           | 0.18       | 167.0 ± 402.0                         | 45.0 ± 34.0            | 56.0 ± 75.0            | 0.19        | 150.0 ± 375.0                              | 43.0 ± 34.0            | 62.0 ± 82.0            | 0.26        |
| <b>C-Reactive Protein (CRP); Median [IQR]; mg/L</b>   | 33.0 [21.0 – 46.0]         | 33.0 [21.0 – 66.0]     | 38.0 [28.0 – 63.0]     | 0.57        | 38.0 [25.0 – 45.0]           | 34.0 [24.0 – 46.0]     | 33.0 [21.0 – 66.0]     | 0.77       | 35.0 [21.0 – 45.0]                    | 33.0 [23.0 – 55.0]     | 38.0 [28.0 – 50.0]     | 0.83        | 35.0 [21.0 – 66.0]                         | 34.0 [20.0 – 54.0]     | 38.0 [28.0 – 45.0]     | 0.63        |
| <b>Lactate Dehydrogenase (LDH); Mean (SD); U/L</b>    | 312.6 ± 187.0              | 366.4 ± 235.1          | 628.9 ± 758.7          | 0.35        | 489.0 ± 207.7                | 318.0 ± 722.3          | 402.0 ± 235.1          | 0.75       | 397.4 ± 149.9                         | 516.5 ± 696.6          | 404.6 ± 155.5          | 0.79        | 406.5 ± 192.1                              | 522.9 ± 688.6          | 385.3 ± 157.0          | 0.75        |
| <b>Lactate Dehydrogenase (LDH); Median [IQR]; U/L</b> | 321.0 [182.5 – 433.0]      | 402.0 [164.0 – 564.0]  | 357.0 [284.0 – 580.0]  | 0.70        | 489.0 [256.0 – 580.0]        | 318.0 [284.0 – 457.0]  | 402.0 [164.0 – 564.0]  | 0.65       | 407.0 [275.5 – 535.0]                 | 330.0 [120.0 – 580.0]  | 357.0 [284.0 – 580.0]  | 0.72        | 407.0 [273.0 – 564.0]                      | 376.0 [120.0 – 580.0]  | 318.0 [284.0 – 489.0]  | 0.48        |
| <b>Fibrinogen; Mean (SD); mg/dl</b>                   | 774.5 ± 666.8              | 719.5 ± 37.5           | 349.5 ± 190.2          | 0.58        | 870.0 ± 545.9                | 303.0 ± 571.5          | 719.5 ± 37.5           | 0.83       | 898.3 ± 310.9                         | 774.5 ± 666.8          | 349.5 ± 190.2          | 0.41        | 898.3 ± 310.9                              | 774.5 ± 666.8          | 349.5 ± 190.2          | 0.41        |
| <b>Fibrinogen; Median [IQR]; mg/dl</b>                | 774.5 [303.0 – 1246.0]     | 719.5 [693.0 – 746.0]  | 349.5 [215.0 – 484.0]  | 0.14        | 870.0 [484.0 – 1256.0]       | 303.0 [215.0 – 1246.0] | 719.5 [693.0 – 746.0]  | 0.91       | 746.0 [693.0 – 1256.0]                | 774.5 [303.0 – 1246.0] | 349.5 [215.0 – 484.0]  | 0.33        | 746.0 [693.0 – 1256.0]                     | 774.5 [303.0 – 1246.0] | 349.5 [215.0 – 484.0]  | 0.33        |
| <b>D- Dimer; Mean (SD); ng/ml</b>                     | 1518.7 ± 891.9             | 2101.4 ± 2834.9        | 4578.3 ± 4646.4        | 0.46        | 6167.5 ± 24190.8             | 2033.5 ± 1082.3        | 483.0 ± 2834.9         | 0.17       | 9634.6 ± 18039.5                      | 11367.4 ± 21456.5      | 3603.8 ± 4265.2        | 0.79        | 9634.6 ± 18039.5                           | 9586.2 ± 19681.0       | 4578.3 ± 4646.4        | 0.90        |



| Model                            | Machine Learning                 |                              |                             |             |                                |                                |                           |            | Expert Opinion                        |                                   |                               |             |                                            |                              |                               |             |
|----------------------------------|----------------------------------|------------------------------|-----------------------------|-------------|--------------------------------|--------------------------------|---------------------------|------------|---------------------------------------|-----------------------------------|-------------------------------|-------------|--------------------------------------------|------------------------------|-------------------------------|-------------|
|                                  | ML-K <sub>3</sub> (K-mean)       |                              |                             |             | ML-S <sub>3</sub> (Spectral)   |                                |                           |            | EX-A <sub>3</sub> (All Comorbidities) |                                   |                               |             | EX-S <sub>3</sub> (Selected Comorbidities) |                              |                               |             |
| Parameter                        | A<br>N = 23<br>(40.4%)           | B<br>N = 19<br>(33.3%)       | C<br>N = 15<br>(26.3%)      | P-<br>value | A<br>N = 20<br>(29.9%)         | B<br>N = 28<br>(41.8%)         | C<br>N = 19<br>(28.4%)    | P<br>value | A<br>N = 19<br>(27.9%)                | B<br>N = 31<br>(45.6%)            | C<br>N = 18<br>(26.5%)        | P-<br>value | A<br>N = 21<br>(30.9%)                     | B<br>N = 33<br>(48.5%)       | C<br>N = 14<br>(20.6%)        | P-<br>value |
| D- Dimer; Median [IQR];<br>ng/ml | 2017.0<br>[489.0<br>–<br>2050.0] | 483.0<br>[300.0 –<br>2725.0] | 3120<br>[836.0 –<br>9779.0] | 0.68        | 6167.5<br>[836.0 –<br>49726.0] | 2033.5<br>[1253.0 –<br>2585.0] | 483.0 [300.0<br>– 2725.0] | 0.41       | 2725.0<br>[300.0 –<br>6935.0]         | 2050.0<br>[2017.0<br>–<br>2556.0] | 1978.0<br>[758.0 –<br>6449.5] | 0.84        | 2725.0<br>[300.0 –<br>6935.0]              | 2033.5<br>[680.0 –<br>2556.] | 3120.0<br>[836.0 –<br>9779.0] | 0.57        |

\* Data on patients' disposition were sparse.

# **Discussion**

## **Literature Review: TOAST and Imaging finding**

**Supplemental Table 22**

**Discussion; Supplemental Table 22. TOAST subclasses and lacunar imaging findings in epidemiological studies**

| Study                                       | Population (Number) | Region                                      | TOAST    |         |                   |                  |           | Imaging pattern |
|---------------------------------------------|---------------------|---------------------------------------------|----------|---------|-------------------|------------------|-----------|-----------------|
|                                             |                     |                                             | LA A (%) | SAO (%) | Cardioembolic (%) | Undetermined (%) | Other (%) | Lacunar (%)     |
| <b>Ornello et al<sup>4</sup></b>            | 128172              | Worldwide                                   | 23       | 22      | 22                | 26               | 3         | -               |
|                                             |                     | Asians                                      | 33       | 24      | 15                | 22               | 2         | -               |
|                                             |                     | White                                       | 19       | 20      | 28                | 27               | 4         | -               |
|                                             |                     | Hispanic                                    | 17       | 25      | 23                | 30               | 3         | -               |
| <b>O'Donnell et al<sup>5</sup></b>          |                     | Blacks                                      | 12       | 24      | 20                | 38               | 5         | -               |
|                                             | 3000                | Worldwide                                   | 19       | 44      | 9                 | 22               | 5         | 21              |
|                                             | 422                 | High-income countries                       | 18       | 30      | 26                | 21               | 4         | 29              |
|                                             | 151                 | South America                               | 4        | 18      | 16                | 46               | 15        | 13              |
|                                             | 1146                | Southeast Asia                              | 11       | 53      | 2                 | 31               | 3         | 22              |
|                                             | 958                 | India                                       | 31       | 50      | 4                 | 11               | 3         | 20              |
| <b>O'Donnell et al<sup>6</sup></b>          | 323                 | Africa                                      | 14       | 27      | 25                | 14               | 20        | 16              |
|                                             | 13447               | Worldwide                                   | -        | -       | -                 | -                | -         | 26.9            |
|                                             | 1917                | Western Europe, North America, Australia    | -        | -       | -                 | -                | -         | 30              |
|                                             | 1394                | Eastern and central Europe, and Middle East | -        | -       | -                 | -                | -         | 20.9            |
|                                             | 1471                | South America                               | -        | -       | -                 | -                | -         | 18.9            |
|                                             | 3987                | China                                       | -        | -       | -                 | -                | -         | 36.4            |
|                                             | 2850                | South Asia                                  | -        | -       | -                 | -                | -         | 26.6            |
|                                             | 855                 | Southeast Asia                              | -        | -       | -                 | -                | -         | 13.9            |
|                                             | 973                 | Africa                                      | -        | -       | -                 | -                | -         | 14              |
| <b>Li et al<sup>7</sup></b>                 | 2555                | UK                                          | 10       | 12      | 38                | 32               |           |                 |
| <b>Lutski et al<sup>8</sup></b>             | 3579                | Israel                                      | 9        | 23      | 11                | 56               | 1         | 26              |
| <b>Yesilot Barlas et al.<sup>9</sup></b>    | 3331                | Europe (15- to 49-year-olds)                | 9.3      | 12      | 17                | 39               | 21        |                 |
| <b>Ihle-Hansen et al.<sup>10</sup></b>      | 210                 | Norway                                      | 11       | 31      | 31                | 25               | -         | 31              |
| <b>Corso et al.<sup>11</sup></b>            | 1057                | Italy                                       | 14       | 20      | 25                | 39               | -         | 20              |
| <b>Lai et al.<sup>12</sup></b>              | 1021                | Taiwan                                      |          |         |                   | -                | -         | 37              |
| <b>Park et al.<sup>13</sup></b>             | 9417                | Korea                                       | 36       | 22      | 21                | -                | -         | -               |
| <b>Lovett et al.<sup>14</sup></b>           | 1079                | UK                                          | 14       | 20      | 25                | 36               | -         | -               |
| <b>Yip et al<sup>15</sup></b>               | 676                 | Taiwan                                      | 17       | 29      | 20                | 29               | 6         | 29              |
| <b>Czlonkowska et al.<sup>16</sup></b>      | 633                 | Poland                                      | -        | -       | -                 | -                | -         | 14              |
| <b>Tanizaki et al<sup>17</sup></b>          | 298                 | Japan                                       | -        | -       | 18                | -                | -         | 56              |
| <b>Schneider et al.<sup>18</sup></b>        | 362                 | US – Black                                  | 10       | 18      | 15                | 54               | 3         | -               |
|                                             | 1594                | US – White                                  | 12       | 15      | 22                | 49               | 2         | -               |
| <b>Schulz et al.<sup>19</sup></b>           | 293                 | UK – Hospitalized                           | 14       | 14      | 28                | 38               | 4         | -               |
|                                             | 345                 | UK – Non hospitalized                       | 15       | 27      | 17                | 34               | 5         | -               |
| <b>Ghandehari et al.<sup>20</sup></b>       | 1392                | Iran                                        |          |         |                   |                  |           | 19              |
| <b>Krishnamurthi et al.<sup>21</sup></b>    | 1643                | New Zealand                                 | 15       | 21      | 29                | 31               | 5         | -               |
| <b>Hauer et al.<sup>22</sup></b>            | 3311                | Netherlands                                 | 24       | 19      | 14                | 34               | 6         | -               |
| <b>Alzamora et al.<sup>23</sup></b>         | 196                 | Spain                                       | -        | -       | -                 | -                | -         | 28              |
| <b>Carrera et al.<sup>24</sup></b>          | 5759                | Switzerland                                 | -        | 15      | -                 | -                | -         | -               |
| <b>Nacu et al.<sup>25</sup></b>             | 228                 | Norway 15-49                                | 3        | 14      | 28                | 35               | 19        | -               |
|                                             | 1126                | Norway 50-74                                | 14       | 16      | 24                | 43               | 1         | -               |
|                                             | 1130                | Norway ≥75                                  | 11       | 8       | 40                | 37               | 1         | -               |
| <b>Bejot et al.<sup>26</sup></b>            | 332                 | France                                      | 35       | 26      | 24                |                  |           | -               |
| <b>Kubo et al.<sup>27</sup></b>             | 430                 | Japan                                       | -        | -       | -                 | -                | -         | 54              |
| <b>Di Carlo et al.<sup>28</sup></b>         | 2740                | Europe                                      | -        | -       | -                 | -                | -         | 26              |
| <b>Kolominsky-Rabas et al.<sup>29</sup></b> | 531                 | Germany                                     | 13       | 22      | 26                | 35               | 1         | -               |
| <b>Hajat et al.<sup>30</sup></b>            | 1181                | UK                                          | 9        | 27      | 27                | 24               | 3         | -               |
| <b>Senel et al.<sup>31</sup></b>            | 2534                | Turkey                                      | 18       | 20      | 22                | 33               | 4         | -               |
|                                             | 2314                | Iran                                        | 10       | 3       | 16                | 58               | 10        | -               |
| <b>Chung et al.<sup>32</sup></b>            | 2702                | Korea                                       | 37       | 22      | 20                | 11               |           | -               |

| Study                                 | Population (Number) | Region                                  | TOAST    |         |                   |                  |           | Imaging pattern |
|---------------------------------------|---------------------|-----------------------------------------|----------|---------|-------------------|------------------|-----------|-----------------|
|                                       |                     |                                         | LA A (%) | SAO (%) | Cardioembolic (%) | Undetermined (%) | Other (%) | Lacunar (%)     |
| Harris et al. <sup>33</sup>           | 235                 | Indonesia                               | 59       | 26      | 2                 | 9                | 1         | -               |
| Rukn et al. <sup>34</sup>             | 4735                | The Middle East and North Africa (MENA) | 46?      | 24      | 17                | -                | -         | -               |
|                                       | 5809                | Non-MENA (Worldwide)                    | 35?      | 21      | 24                | -                | -         | -               |
| Saber et al. <sup>35</sup>            | 512                 | Iran                                    | 14       | 22      | 15                | 43               | 4         | -               |
| Porcello Marrone et al. <sup>36</sup> | 688                 | Brazil                                  | 32       | 18      | 28                | 16               | 4         | -               |
| Tsai et al. <sup>37</sup>             | 13254               | Chinese                                 | 43       | 18      | 8                 | -                | -         | 24              |
|                                       | 12689               | White                                   | 26       | 22      | 25                | -                | -         | 28              |
| Sarfo et al. <sup>38</sup>            | 515                 | Nigeria & Ghana < 50-year-old           | 40       | 28      | 11                | -                | -         | -               |
|                                       | 1603                | Nigeria & Ghana ≥50-year-old            | 32       | 39      | 7                 | -                | -         | -               |
| Wafa et al. <sup>39</sup>             | 3088                | UK                                      | 11       | 25      | 26                | 34               | 2         | -               |
| Khorvash et al. <sup>40</sup>         | 1910                | Iran                                    | 8        | 25      | 21                | 43               | 2         | -               |
| Khealani et al. <sup>41</sup>         | 874                 | Pakistan                                | 31       | 25      | 10                | 32               |           | -               |
| Kumral et al. <sup>42</sup>           | 1529                | Turkey                                  |          | 13      | -                 | -                | -         | 13              |
| Lee et al. <sup>43</sup>              | 1567                | Korea                                   | 42       | 31      | 8                 | 16               | 1         | -               |
| Grau et al. <sup>44</sup>             | 5017                | Germany                                 | 20       | 20      | 25                | -                | -         | -               |

## References

1. von Elm E, Altman DG, Egger M, Pocock SJ, Gøtzsche PC, Vandenbroucke JP. The strengthening the reporting of observational studies in epidemiology (STROBE) statement: Guidelines for reporting observational studies. *Int J Surg*. 2014;12(12):1495-1499. [doi:10.1016/j.ijsu.2014.07.013](https://doi.org/10.1016/j.ijsu.2014.07.013)
2. Equator Network. Enhancing the QUALity and Transparency Of health Research. University of Oxford. <https://www.equator-network.org>. Published 2019.
3. Palacio-Niño J-O, Berzal F. Evaluation Metrics for Unsupervised Learning Algorithms. 2019. <http://arxiv.org/abs/1905.05667>.
4. Ornello R, Degan D, Tiseo C, et al. Distribution and temporal trends from 1993 to 2015 of ischemic stroke subtypes a systematic review and meta-analysis. *Stroke*. 2018;49(4):814-819. [doi:10.1161/STROKEAHA.117.020031](https://doi.org/10.1161/STROKEAHA.117.020031)
5. O'Donnell MJ, Denis X, Liu L, et al. Risk factors for ischaemic and intracerebral haemorrhagic stroke in 22 countries (the INTERSTROKE study): A case-control study. *Lancet*. 2010;376(9735):112-123. [doi:10.1016/S0140-6736\(10\)60834-3](https://doi.org/10.1016/S0140-6736(10)60834-3)
6. O'Donnell MJ, Chin SL, Rangarajan S, et al. Global and regional effects of potentially modifiable risk factors associated with acute stroke in 32 countries (INTERSTROKE): a case-control study. *Lancet*. 2016;388(10046):761-775. [doi:10.1016/S0140-6736\(16\)30506-2](https://doi.org/10.1016/S0140-6736(16)30506-2)
7. Li L, Yiin GS, Geraghty OC, et al. Incidence, outcome, risk factors, and long-term prognosis of cryptogenic transient ischaemic attack and ischaemic stroke: A population-based study. *Lancet Neurol*. 2015;14(9):903-913. [doi:10.1016/S1474-4422\(15\)00132-5](https://doi.org/10.1016/S1474-4422(15)00132-5)
8. Lutski M, Zucker I, Shohat T, Tanne D. Characteristics and outcomes of young patients with first-ever ischemic stroke compared to older patients: The national acute stroke Israeli registry. *Front Neurol*. 2017;8(AUG). [doi:10.3389/fneur.2017.00421](https://doi.org/10.3389/fneur.2017.00421)
9. Yesilot Barlas N, Putaala J, Waje-Andreassen U, et al. Etiology of first-ever ischaemic stroke in European young adults: The 15 cities young stroke study. *Eur J Neurol*. 2013;20(11):1431-1439. [doi:10.1111/ene.12228](https://doi.org/10.1111/ene.12228)
10. Ihle-Hansen H, Thommessen B, Wyller TB, Engedal K, Fure B. Risk factors for and incidence of subtypes of ischemic stroke. *Funct Neurol*. 2012;27(1):35-40.
11. Corso G, Bottacchi E, Tosi P, et al. Outcome Predictors in First-Ever Ischemic Stroke Patients: A Population-Based Study. *Int Sch Res Not*. 2014;2014:1-8. [doi:10.1155/2014/904647](https://doi.org/10.1155/2014/904647)
12. Lai S-L, Weng H-H, Lee M, Hsiao M-C, Lin L-J, Huang W-Y. Risk factors and subtype analysis of acute ischemic stroke. *Eur Neurol*. 2008;60(5):230-236. [doi:10.1159/000151698](https://doi.org/10.1159/000151698)
13. Park TH, Ko Y, Lee SJ, et al. Gender differences in the age-stratified prevalence of risk factors in Korean ischemic stroke patients: A nationwide stroke registry-based cross-sectional study. *Int J Stroke*. 2014;9(6):759-765. [doi:10.1111/ijss.12146](https://doi.org/10.1111/ijss.12146)
14. Lovett JK, Coull AJ, Rothwell PM. Early risk of recurrence by subtype of ischemic stroke in population-based incidence studies. *Neurology*. 2004;62(4):569 LP - 573. [doi:10.1212/01.WNL.0000110311.09970.83](https://doi.org/10.1212/01.WNL.0000110311.09970.83)
15. Ping-Keung Y, Jiann-Shing J, Ti-Kai L, et al. Subtypes of Ischemic Stroke . *Stroke*. 1997;28(12):2507-2512. [doi:10.1161/01.STR.28.12.2507](https://doi.org/10.1161/01.STR.28.12.2507)
16. Czlonkowska A, Ryglewicz D, Weissbein T, Baranska-Gieruszczak M, Hier DB. A prospective community-based study of stroke in warsaw, poland. *Stroke*. 1994;25(3):547-551. [doi:10.1161/01.STR.25.3.547](https://doi.org/10.1161/01.STR.25.3.547)
17. Tanizaki Y, Kiyohara Y, Kato I, et al. Incidence and risk factors for subtypes of cerebral infarction in a general population: The Hisayama study. *Stroke*. 2000;31(11):2616-2622. [doi:10.1161/01.STR.31.11.2616](https://doi.org/10.1161/01.STR.31.11.2616)
18. Schneider AT, Kissela B, Woo D, et al. Ischemic stroke subtypes: A population-based study of incidence rates among blacks and whites. *Stroke*. 2004;35(7):1552-1556. [doi:10.1161/01.STR.0000129335.28301.f5](https://doi.org/10.1161/01.STR.0000129335.28301.f5)
19. Schulz UGR, Rothwell PM. Differences in vascular risk factors between etiological subtypes of ischemic stroke: Importance of population-based studies. *Stroke*. 2003;34(8):2050-2059. [doi:10.1161/01.STR.0000079818.08343.8C](https://doi.org/10.1161/01.STR.0000079818.08343.8C)
20. Ghandehari K, Izadi-Mood Z. Khorasan stroke registry: Analysis of 1392 stroke patients. *Arch Iran Med*. 2007;10(3):327-334. [doi:07103/AIM.009](https://doi.org/10.7103/AIM.009)

21. V. KR, Suzanne B-C, Varsha P, et al. Stroke Incidence by Major Pathological Type and Ischemic Subtypes in the Auckland Regional Community Stroke Studies. *Stroke*. 2018;49(1):3-10. [doi:10.1161/STROKEAHA.117.019358](https://doi.org/10.1161/STROKEAHA.117.019358)
22. Hauer AJ, Ruigrok YM, Algra A, et al. Age-Specific Vascular Risk Factor Profiles According to Stroke Subtype. *J Am Heart Assoc*. 2017;6(5):e005090. [doi:10.1161/JAHA.116.005090](https://doi.org/10.1161/JAHA.116.005090)
23. Alzamora MT, Sorribes M, Heras A, et al. Ischemic stroke incidence in Santa Coloma de Gramenet (ISISCOG), Spain. A community-based study. *BMC Neurol*. 2008;8:5. [doi:10.1186/1471-2377-8-5](https://doi.org/10.1186/1471-2377-8-5)
24. Carrera E, Maeder-Ingvar M, Rossetti AO, Devuyst G, Bogousslavsky J. Trends in Risk Factors, Patterns and Causes in Hospitalized Strokes over 25 Years: The Lausanne Stroke Registry. *Cerebrovasc Dis*. 2007;24(1):97-103. [doi:10.1159/000103123](https://doi.org/10.1159/000103123)
25. Nacu A, Fromm A, Sand KM, Waje-Andreassen U, Thomassen L, Naess H. Age dependency of ischaemic stroke subtypes and vascular risk factors in western Norway: The Bergen Norwegian Stroke Cooperation Study. *Acta Neurol Scand*. 2016;133(3):202-207. [doi:10.1111/ane.12446](https://doi.org/10.1111/ane.12446)
26. Bejot Y, Caillier M, Ben Salem D, et al. Ischaemic stroke subtypes and associated risk factors: A French population based study. *J Neurol Neurosurg Psychiatry*. 2008;79(12):1344-1348. [doi:10.1136/jnnp.2008.150318](https://doi.org/10.1136/jnnp.2008.150318)
27. Kubo M, Hata J, Doi Y, Tanizaki Y, Iida M, Kiyohara Y. Secular trends in the incidence of and risk factors for ischemic stroke and its subtypes in Japanese population. *Circulation*. 2008;118(25):2672-2678. [doi:10.1161/CIRCULATIONAHA.107.743211](https://doi.org/10.1161/CIRCULATIONAHA.107.743211)
28. Di Carlo A, Lamassa M, Baldereschi M, et al. Risk factors and outcome of subtypes of ischemic stroke. Data from a multicenter multinational hospital-based registry. The European Community Stroke Project. *J Neurol Sci*. 2006;244(1-2):143-150. [doi:10.1016/j.jns.2006.01.016](https://doi.org/10.1016/j.jns.2006.01.016)
29. L. K-RP, Margarete W, Olaf G, Bernhard N, U. HP. Epidemiology of Ischemic Stroke Subtypes According to TOAST Criteria. *Stroke*. 2001;32(12):2735-2740. [doi:10.1161/hs1201.100209](https://doi.org/10.1161/hs1201.100209)
30. Hajat C, Heuschmann PU, Coshall C, et al. Incidence of aetiological subtypes of stroke in a multi-ethnic population based study: The south London Stroke Register. *J Neurol Neurosurg Psychiatry*. 2011;82(5):527-533. [doi:10.1136/jnnp.2010.222919](https://doi.org/10.1136/jnnp.2010.222919)
31. Senel GB, Elmali AD, Mehrvar K, et al. A survey from Turkey and Iran on comparison of risk factors and etiology in ischemic stroke. *Iran J Neurol*. 2020;18(4):176-178. [doi:10.18502/ijnl.v18i4.2189](https://doi.org/10.18502/ijnl.v18i4.2189)
32. Chung JW, Park SH, Kim N, et al. Trial of ORG 10172 in acute stroke treatment (TOAST) classification and vascular territory of ischemic stroke lesions diagnosed by diffusion-weighted imaging. *J Am Heart Assoc*. 2014;3(4):1-8. [doi:10.1161/JAHA.114.001119](https://doi.org/10.1161/JAHA.114.001119)
33. Harris S, Sungkar S, Rasyid A, Kurniawan M, Mesiano T, Hidayat R. TOAST Subtypes of Ischemic Stroke and Its Risk Factors: A Hospital-Based Study at Cipto Mangunkusumo Hospital, Indonesia. *Stroke Res Treat*. 2018;2018. [doi:10.1155/2018/9589831](https://doi.org/10.1155/2018/9589831)
34. Rukn S Al, Mazya M V., Hentati F, et al. Stroke in the Middle-East and North Africa: A 2-year prospective observational study of stroke characteristics in the region—Results from the Safe Implementation of Treatments in Stroke (SITS)—Middle-East and North African (MENA). *Int J Stroke*. 2019;14(7):715-722. [doi:10.1177/1747493019830331](https://doi.org/10.1177/1747493019830331)
35. Saber H, Thrift AG, Kapral MK, et al. Incidence, recurrence, and long-term survival of ischemic stroke subtypes: A population-based study in the Middle East. *Int J Stroke*. 2017;12(8):835-843. [doi:10.1177/1747493016684843](https://doi.org/10.1177/1747493016684843)
36. Porcello Marrone LC, Diogo LP, De Oliveira FM, et al. Risk factors among stroke subtypes in Brazil. *J Stroke Cerebrovasc Dis*. 2013;22(1):32-35. [doi:10.1016/j.jstrokecerebrovasdis.2011.05.022](https://doi.org/10.1016/j.jstrokecerebrovasdis.2011.05.022)
37. Tsai CF, Anderson N, Thomas B, Sudlow CLM. Risk factors for ischemic stroke and its subtypes in Chinese vs. Caucasians: Systematic review and meta-analysis. *Int J Stroke*. 2015;10(4):485-493. [doi:10.1111/ijis.12508](https://doi.org/10.1111/ijis.12508)
38. Stephen SF, Bruce O, Mulugeta G, et al. Stroke Among Young West Africans. *Stroke*. 2018;49(5):1116-1122. [doi:10.1161/STROKEAHA.118.020783](https://doi.org/10.1161/STROKEAHA.118.020783)
39. Wafa HA, Wolfe CDA, Rudd A, Wang Y. Long-term trends in incidence and risk factors for ischaemic stroke subtypes: Prospective population study of the South London Stroke Register. *PLoS Med*. 2018;15(10):1-16. [doi:10.1371/journal.pmed.1002669](https://doi.org/10.1371/journal.pmed.1002669)
40. Khorvash F, Khalili M, Rezvani Habibabadi R, et al. Comparison of acute ischemic stroke evaluation and the etiologic subtypes between university and nonuniversity hospitals in Isfahan, Iran. *Int J Stroke*. 2019;14(6):613-619.

[doi:10.1177/1747493019828648](https://doi.org/10.1177/1747493019828648)

41. Khealani BA, Khan M, Tariq M, et al. Ischemic strokes in Pakistan: Observations from the national acute ischemic stroke database. *J Stroke Cerebrovasc Dis*. 2014;23(6):1640-1647. [doi:10.1016/j.jstrokecerebrovasdis.2014.01.009](https://doi.org/10.1016/j.jstrokecerebrovasdis.2014.01.009)
42. Kumral E, Özkaya B, Sagduyu A, Şirin H, Vardarli E, Pehliva M. The Ege Stroke Registry: A hospital-based study in the Aegean Region, Izmir, Turkey. *Cerebrovasc Dis*. 1998;8(5):278-288. [doi:10.1159/000015866](https://doi.org/10.1159/000015866)
43. Lee B-C, Hwang S-H, Jung S, et al. The Hallym Stroke Registry: A web-based stroke data bank with an analysis of 1,654 consecutive patients with acute stroke. *Eur Neurol*. 2005;54(2):81-87. [doi:10.1159/000088097](https://doi.org/10.1159/000088097)
44. Grau AJ, Weimar C, Buggle F, et al. Risk factors, outcome, and treatment in subtypes of ischemic stroke: The German stroke data bank. *Stroke*. 2001;32(11):2559-2566. [doi:10.1161/hs1101.098524](https://doi.org/10.1161/hs1101.098524)
